# Supplementary material for: Photoredox-catalyzed coupling of acyl oxime acetates with thiophenols to give arylthioesters in water at room temperature
Source: Royal Society of Chemistry journal article supplement (doi:10.1039/d2gc02438a), 2022-01-01
Supplement: d2gc02438a1.pdf [file d2gc02438a1.pdf]

*Electronic Supplementary Information (ESI) for*

**Photoredox-catalyzed coupling of acyl oxime acetates with  
thiophenols to give arylthioesters in water at room temperature**

Yuanyuan Fu, Shengzhen Zhu, Xueyan Zhao, and Shenlin Huang\*

Jiangsu Co-Innovation Center of Efficient Processing and Utilization of  
Forest Resources, International Innovation Center for Forest Chemicals and  
Materials, Nanjing Forestry University, Nanjing-210037, People's Republic of China.  
E-mail: shuang@njfu.edu.cn

## Table of Contents

|       |                                                              |    |
|-------|--------------------------------------------------------------|----|
| I.    | General Information and Materials .....                      | 3  |
| II.   | Optimization Tables.....                                     | 6  |
| III.  | Synthesis and Characterization of Products <b>3-31</b> ..... | 8  |
| IV.   | One-pot Protocol .....                                       | 20 |
| V.    | Derivatization of compound <b>3</b> .....                    | 21 |
| VI.   | Recycle Study and E Factor Calculation.....                  | 23 |
| VII.  | Mechanistic Studies.....                                     | 25 |
| VIII. | Crystal Data for <b>18</b> and <b>33</b> .....               | 27 |
| IX.   | References .....                                             | 31 |
| X.    | NMR Spectra.....                                             | 31 |

## I. General Information and Materials

### General Information

Unless otherwise stated, all glassware was oven dried. All reagents were used as received from commercial suppliers unless otherwise indicated. Reactions were monitored using Thin Layer Chromatography (TLC) carried out on Merck silica gel plates (60F-254) using UV light as the visualizing agent and High Performance Liquid Chromatography (HPLC) with UV detection at 254 nm. For HPLC yields, UV response factors relative to an internal standard (diphenyl sulfide). Flash column chromatography was performed using silica gel 60 (200-300 mesh). HRMS data were recorded on Thermo Fisher LTQ OrbitrapXL and micrOTOF-Q III. All  $^1\text{H}$  NMR,  $^{13}\text{C}$  NMR spectra were recorded on Bruker DRX-600 and AMX-400 instruments. Chemical shifts were given in parts per million (ppm,  $\delta$ ), referenced to the solvent peak of  $\text{CDCl}_3$ , defined at  $\delta = 7.26$  ( $^1\text{H}$  NMR), defined at  $\delta = 77.16$  ( $^{13}\text{C}$  NMR); or  $\text{DMSO-d}_6$ , defined at  $\delta = 2.5$  ( $^1\text{H}$  NMR), defined at  $\delta = 39.52$  ( $^{13}\text{C}$  NMR). Coupling constants were quoted in Hz (J).  $^1\text{H}$  NMR Spectroscopy splitting patterns were designated as singlet (s), doublet (d), triplet (t), quartet (q). Splitting patterns that could not be interpreted or easily visualized were designated as multiplet (m) or broad (br).

### Materials

**Table S1.** Oxime acetates used in this study

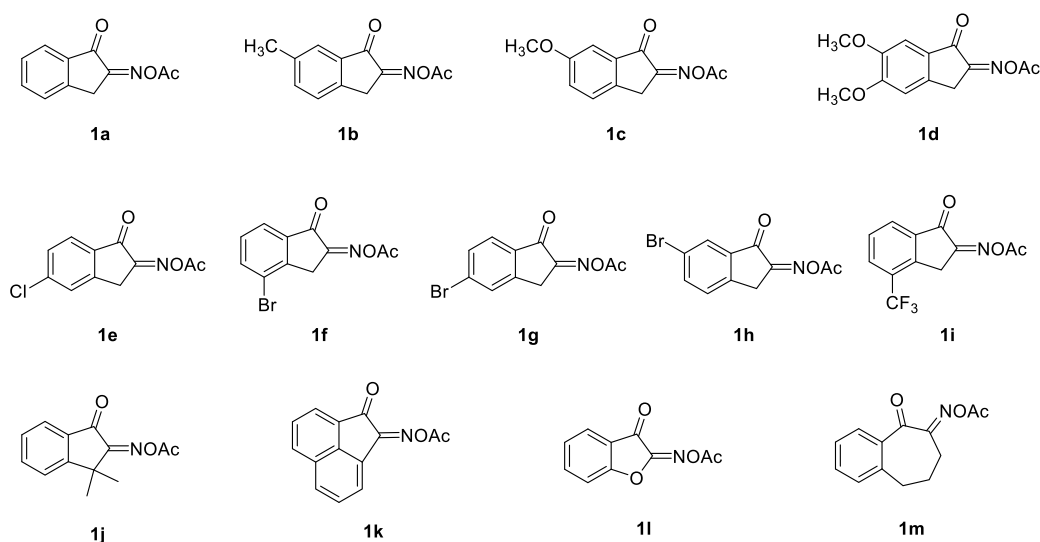

**1a-1j**, **1m** were synthesized according to Procedure A<sup>1,2</sup>, **1k** was synthesized according to Procedure B<sup>3</sup> and **1l** was synthesized according to Procedure C<sup>4</sup>.

### Procedure A<sup>1,2</sup>:

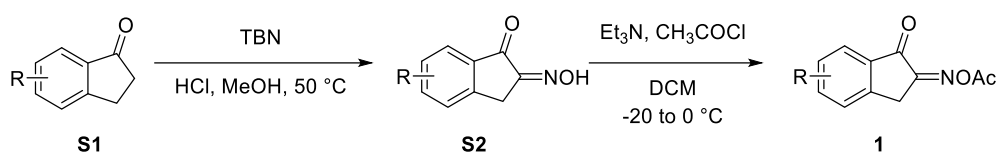

*Step1* To a solution of 1-indanone **S1** (10 mmol) in methanol (20 mL) was added conc. HCl (480  $\mu$ L, 5.7 mmol) followed by tert-Butyl nitrite (1.5 mL, 12 mmol) dropwise. The reaction was kept stirring at 50 °C for 2 h. The reaction mixture was cooled to room temperature and a white precipitate formed. Half of MeOH was removed by rotary evaporation before filtration. The crude solid was washed with DCM and filtered to afford the 2-oximino-1-indanone **S2**.

*Step2* To a mixture of 2-oximino-1-indanone **S2** (5 mmol), DCM (15 mL), Et<sub>3</sub>N (1.1 mL, 7.5 mmol) in a 100 mL flask was added acetyl chloride (544  $\mu$ L, 7.5 mmol) dropwise at -20 °C and the mixture was stirred at 0 °C for 2 h. After then, a saturated solution of aqueous NaHCO<sub>3</sub> (30 mL) was added to the above solution, and the mixture was extracted with DCM. The combined organic layers were concentrated in vacuo and the residue was purified by recrystallization with PE and EtOAc to give 1-indanone oxime acetate **1**.

### Procedure B<sup>3</sup>:

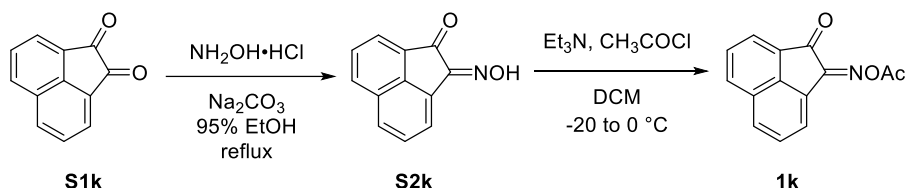

*Step1* A suspension of acenaphthoquinone **S1k** (1.1 g, 5 mmol), hydroxylamine hydrochloride (355 mg, 5 mmol) and Na<sub>2</sub>CO<sub>3</sub> (535 mg, 5 mmol) in 95% EtOH (25 mL) was heated under reflux condition for 45 min then cooled to rt. The precipitate was filtered, washed with water, and dried under vacuo to afford **S2k**.

*Step2* The preparation of **1k** from **S2k** was the same as Procedure A, Step 2.

<sup>1</sup>H NMR (600 MHz, CDCl<sub>3</sub>)  $\delta$  8.35 (d, J = 7.1 Hz, 1H), 8.15 (d, J = 8.2 Hz, 1H), 8.06 (dd, J = 16.0, 7.7 Hz, 2H), 7.79 - 7.71 (m, 2H), 2.48 (s, 3H).

<sup>13</sup>C NMR (150 MHz, CDCl<sub>3</sub>)  $\delta$  187.8, 169.5, 153.4, 142.3, 132.6, 131.6, 131.0, 130.3, 129.1, 128.9, 127.4, 125.9, 123.2, 19.4.

HRMS-ESI (m/z) [M+H]<sup>+</sup> calculated for C<sub>14</sub>H<sub>11</sub>NO<sub>3</sub> 240.0655, found 240.0653.

**Procedure C<sup>4</sup>:**

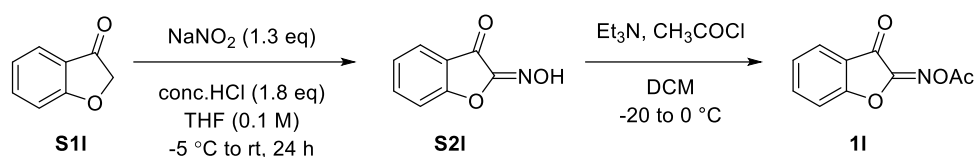

*Step1* To a pre-cooled ( $-5\text{ }^\circ\text{C}$ ) solution of 3-coumaranone **S11** (2 mmol) and  $\text{NaNO}_2$  (182 mg, 2.6 mmol) in THF (20 mL) was slowly added conc. HCl (300  $\mu\text{L}$ , 3.6 mmol). The resulting mixture was kept at  $-5\text{ }^\circ\text{C}$  for 15 min and then warmed up to room temperature with stirring for another 24 h. Subsequently, the mixture was quenched by water and extracted with EtOAc. The combined organic layers were concentrated in vacuo and the residue was purified by recrystallization with PE and EtOAc to give **S21**.

*Step2* The preparation of **11** from **S21** was the same as Procedure A, Step 2.

$^1\text{H NMR}$  (600 MHz,  $\text{CDCl}_3$ )  $\delta$  7.81 - 7.74 (m, 2H), 7.37 - 7.30 (m, 2H), 2.33 (s, 3H).

$^{13}\text{C NMR}$  (150 MHz,  $\text{CDCl}_3$ )  $\delta$  179.7, 167.7, 165.3, 149.2, 139.9, 126.0, 125.9, 121.0, 113.6, 19.0.

**HRMS-ESI** (m/z)  $[\text{M}+\text{H}]^+$  calculated for  $\text{C}_{10}\text{H}_9\text{NO}_4$  206.0448, found 206.0447.

Spectroscopic data matches that reported in the literature.<sup>5</sup>

## II. Optimization Tables

All optimization reactions were carried out on 0.1 mmol scale and yields were determined by HPLC analysis with diphenyl sulfide as the internal standard.

**Table S2.** Screening of different solvents

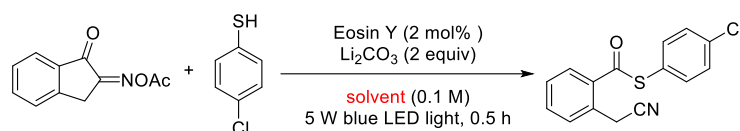

| Entry     | Solvent                                          | Yield      | Entry | Solvent                                                  | Yield |
|-----------|--------------------------------------------------|------------|-------|----------------------------------------------------------|-------|
| 1         | THF                                              | 0          | 11    | 2 wt% MPEG-750/H <sub>2</sub> O                          | 76%   |
| 2         | CH <sub>3</sub> CN                               | 0          | 12    | 2 wt% PEG-600/H <sub>2</sub> O                           | 81%   |
| 3         | DCM                                              | 0          | 13    | MPEG-550                                                 | 0     |
| 4         | Dioxane                                          | 0          | 14    | 2 wt% THF/H <sub>2</sub> O                               | 70%   |
| 5         | EtOH                                             | 0          | 15    | 2 wt% 1,4-dioxane/H <sub>2</sub> O                       | 70%   |
| 6         | H <sub>2</sub> O                                 | 64%        | 16    | 2 wt% triethylene glycol dimethyl ether/H <sub>2</sub> O | 68%   |
| 7         | 2 wt% TWEEN 80 <sup>a</sup>                      | 30%        | 17    | 0.5 wt% MPEG-550                                         | 87%   |
| 8         | 2 wt% DTAB <sup>b</sup>                          | 17%        | 18    | 1 wt% MPEG-550                                           | 80%   |
| 9         | 2 wt% BrijL23 <sup>c</sup>                       | 31%        | 19    | 3 wt% MPEG-550                                           | 86%   |
| <b>10</b> | <b>2 wt% MPEG-550<sup>d</sup>/H<sub>2</sub>O</b> | <b>89%</b> | 20    | 4 wt% MPEG-550                                           | 86%   |

<sup>a</sup>TWEEN = Polysorbate 80. <sup>b</sup>DTAB = Dodecyltrimethylammonium bromide. <sup>c</sup>BrijL23 = Polyoxethyleneglycol-23 lauryl ether. <sup>d</sup>MPEG = Poly(ethylene glycol) methyl ether.

**Table S3.** Screening of different Photocatalysts

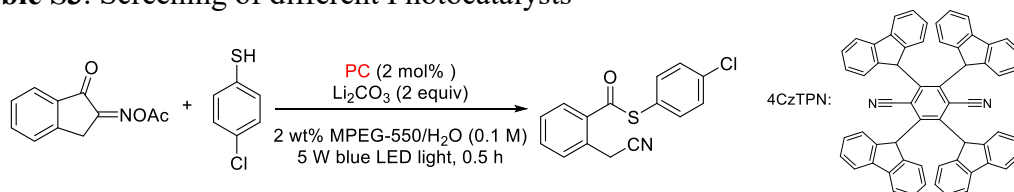

| Entry    | PC                                                     | Yield      | Entry | PC             | Yield |
|----------|--------------------------------------------------------|------------|-------|----------------|-------|
| <b>1</b> | <b>Eosin Y</b>                                         | <b>89%</b> | 6     | ErythrosinB    | 74%   |
| 2        | Eosin B                                                | 83%        | 7     | Rhodamine 6G   | 15%   |
| 3        | Eosin Y (2Na <sup>+</sup> )                            | 76%        | 8     | 1 mol% Eosin Y | 64%   |
| 4        | Ru(bpy) <sub>3</sub> Cl <sub>2</sub> ·H <sub>2</sub> O | 70%        | 9     | 3 mol% Eosin Y | 67%   |
| 5        | 4CzTPN                                                 | 18%        | 10    | 5 mol% Eosin Y | 79%   |

**Table S4.** Screening of different bases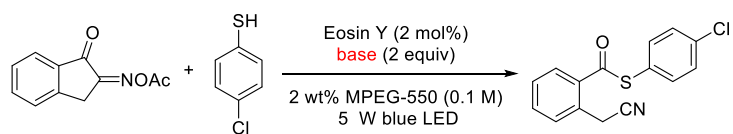

| Entry | Base                            | Yield | Entry | Base                                    | Yield |
|-------|---------------------------------|-------|-------|-----------------------------------------|-------|
| 1     | Li <sub>2</sub> CO <sub>3</sub> | 89%   | 7     | LiOH                                    | 28%   |
| 2     | Na <sub>2</sub> CO <sub>3</sub> | 84%   | 8     | Et <sub>3</sub> N                       | 43%   |
| 3     | K <sub>2</sub> CO <sub>3</sub>  | 85%   | 9     | 1 equiv Li <sub>2</sub> CO <sub>3</sub> | 32%   |
| 4     | Cs <sub>2</sub> CO <sub>3</sub> | 0     | 10    | 1 equiv Li <sub>2</sub> CO <sub>3</sub> | 79%   |
| 5     | LiOAc                           | 8%    | 11    | 1 equiv Li <sub>2</sub> CO <sub>3</sub> | 71%   |
| 6     | <sup>t</sup> BuOLi              | 0     |       |                                         |       |

### III. Synthesis and Characterization of Product 3-31.

#### General Procedure D:

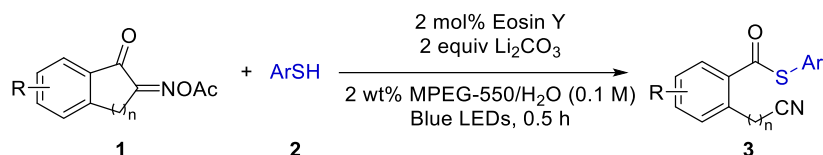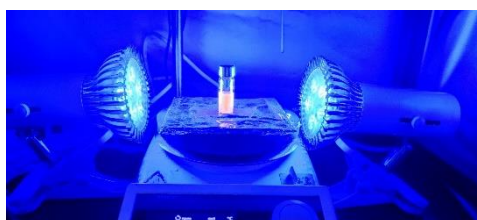

Figure S1 Reaction device

A mixture of 1-indanone oxime acetate **1** (0.1 mmol), thiophenol **2** (0.15 mmol), Eosin Y (1.3 mg, 2 mol%) and  $\text{Li}_2\text{CO}_3$  (0.2 mmol, 14.9 mg,) in a 4 mL vial was added 2 wt% MPEG-550/ $\text{H}_2\text{O}$  (1 mL). The reaction mixture was stirred under the irradiation of 2×5 W Blue LEDs ( $\lambda = 440 - 480\text{nm}$ ) at room temperature for 0.5 h. The reaction mixture was quenched by EtOAc and concentrated in vacuo. The crude was purified by flash chromatography (petroleum ether/ethyl acetate = 100/1 - 10/1) on silica gel to provide the corresponding products.

#### Procedure E (preparation of substrates **8**, **14**, **18**, **28** and **31**):

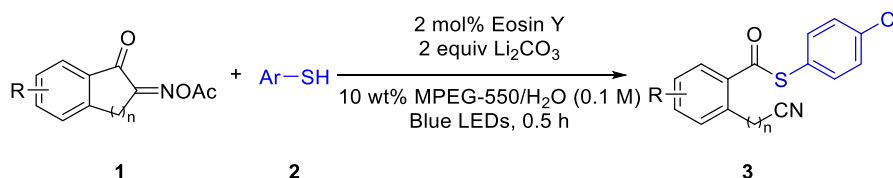

A mixture of 1-indanone oxime acetate **1** (0.1 mmol), thiophenol **2** (0.15 mmol), Eosin Y (1.3 mg, 2 mol%) and  $\text{Li}_2\text{CO}_3$  (0.2 mmol, 14.9 mg,) in a 4 mL vial was added 10 wt% MPEG-550/ $\text{H}_2\text{O}$  (1 mL). The reaction mixture was stirred under the irradiation of 2×5 W Blue LEDs ( $\lambda = 440 - 480\text{nm}$ ) at room temperature for 0.5 h. The reaction mixture was quenched by EtOAc and concentrated in vacuo. The crude was purified by flash chromatography (petroleum ether/ethyl acetate = 100/1 - 10/1) on silica gel to provide the corresponding products.

#### Unsuccessful substrates:

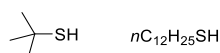



S-(4-chlorophenyl) 2-(cyanomethyl)benzothioate (**3**)

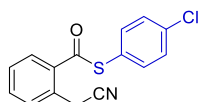

Following Procedure D, 2-(acetoxylimino)-2,3-dihydro-1*H*-inden-1-one (20.9 mg, 0.1 mmol) and 4-chlorobenzenethiol (22.1 mg, 0.15 mmol) was used to afford the desired product.

25.6 mg, 89%. White solid.

$R_f = 0.39$  (10% EA in PE)

$^1\text{H NMR}$  (600 MHz,  $\text{CDCl}_3$ )  $\delta$  8.12 (d,  $J = 7.7$  Hz, 1H), 7.64 - 7.60 (m, 2H), 7.53 - 7.49 (m, 1H), 7.45 (s, 4H), 4.04 (s, 2H).

$^{13}\text{C NMR}$  (150 MHz,  $\text{CDCl}_3$ )  $\delta$  192.2, 136.8, 136.7, 135.3, 133.9, 130.8, 130.12, 130.09, 129.8, 129.0, 126.0, 117.7, 22.3.

**HRMS-ESI** ( $m/z$ )  $[\text{M}+\text{Na}]^+$  calculated for  $\text{C}_{15}\text{H}_{10}\text{ClNOSNa}$  310.0064, found 310.0050.

S-(*p*-tolyl) 2-(cyanomethyl)benzothioate (**4**)

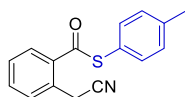

Following Procedure D, 2-(acetoxylimino)-2,3-dihydro-1*H*-inden-1-one (20.9 mg, 0.1 mmol) and 4-methylbenzenethiol (19.0 mg, 0.15 mmol) was used to afford the desired product.

17.8 mg, 67%. White solid.

$R_f = 0.32$  (10% EA in PE)

$^1\text{H NMR}$  (600 MHz,  $\text{CDCl}_3$ )  $\delta$  8.14 (d,  $J = 7.7$  Hz, 1H), 7.64 - 7.58 (m, 2H), 7.53 - 7.47 (m, 1H), 7.40 (d,  $J = 8.0$  Hz, 2H), 7.30 (d,  $J = 7.9$  Hz, 2H), 4.06 (s, 2H), 2.42 (s, 3H).

$^{13}\text{C NMR}$  (150 MHz,  $\text{CDCl}_3$ )  $\delta$  193.3, 140.8, 135.7, 135.4, 133.6, 130.7, 130.7, 130.1, 129.7, 128.9, 124.0, 117.9, 22.3, 21.2.

**HRMS-ESI** ( $m/z$ )  $[\text{M}+\text{H}]^+$  calculated for  $\text{C}_{16}\text{H}_{14}\text{NOS}$  268.0791, found 268.0782.

S-(4-isopropylphenyl) 2-(cyanomethyl)benzothioate (**5**)

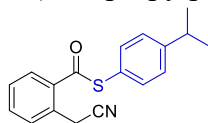

Following Procedure D, 2-(acetoxylimino)-2,3-dihydro-1*H*-inden-1-one (20.9 mg, 0.1 mmol) and 4-isopropylbenzenethiol (24.0 mg, 0.15 mmol) was used to afford the desired product.

24.6 mg, 84%. Yellow solid.

$R_f = 0.40$  (10% EA in PE)

$^1\text{H NMR}$  (600 MHz,  $\text{CDCl}_3$ )  $\delta$  8.15 (d,  $J = 7.5$  Hz, 1H), 7.65 - 7.59 (m, 2H), 7.54 - 7.48 (m, 1H), 7.46 - 7.41 (m, 2H), 7.35 (d,  $J = 8.1$  Hz, 2H), 4.07 (s, 2H), 3.01 - 2.93 (m, 1H), 1.29 (d,  $J = 6.9$  Hz, 6H).

$^{13}\text{C NMR}$  (150 MHz,  $\text{CDCl}_3$ )  $\delta$  193.3, 151.5, 135.7, 135.4, 133.6, 130.7, 130.2, 129.7, 128.9, 128.1, 124.2, 117.9, 33.9, 23.6, 22.3.

**HRMS-ESI** (m/z) [M+H]<sup>+</sup> calculated for C<sub>18</sub>H<sub>18</sub>NOS 296.1104, found 296.1106.

*S*-(4-(tert-butyl)phenyl) 2-(cyanomethyl)benzothioate (**6**)

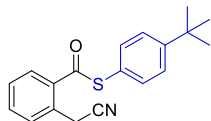

Following Procedure D, 2-(acetoxylimino)-2,3-dihydro-1*H*-inden-1-one (20.9 mg, 0.1 mmol) and 4-tert-butylbenzenethiol (25.5 mg, 0.15 mmol) was used to afford the desired product.

19.5 mg, 63%. Yellow solid.

R<sub>f</sub> = 0.27 (10% EA in PE)

**<sup>1</sup>H NMR** (600 MHz, CDCl<sub>3</sub>) δ 8.16 (d, J = 7.7 Hz, 1H), 7.65 - 7.59 (m, 2H), 7.50 (dd, J = 12.0, 5.0 Hz, 3H), 7.45 (d, J = 8.4 Hz, 2H), 4.07 (s, 2H), 1.36 (s, 9H).

**<sup>13</sup>C NMR** (150 MHz, CDCl<sub>3</sub>) δ 193.3, 153.8, 135.7, 135.1, 133.7, 130.7, 130.2, 129.7, 128.9, 127.0, 124.0, 117.9, 34.7, 31.1, 22.3.

**HRMS-ESI** (m/z) [M+H]<sup>+</sup> calculated for C<sub>19</sub>H<sub>20</sub>NOS 310.1260, found 310.1250.

*S*-(4-methoxyphenyl) 2-(cyanomethyl)benzothioate (**7**)

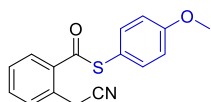

Following Procedure D, 2-(acetoxylimino)-2,3-dihydro-1*H*-inden-1-one (20.9 mg, 0.1 mmol) and 4-methoxybenzenethiol (21.5 mg, 0.15 mmol) was used to afford the desired product.

22.0 mg, 63%. Light yellow solid.

R<sub>f</sub> = 0.43 (20% EA in PE)

**<sup>1</sup>H NMR** (600 MHz, CDCl<sub>3</sub>) δ 8.13 (d, J = 7.7 Hz, 1H), 7.64 - 7.57 (m, 2H), 7.53 - 7.47 (m, 1H), 7.45 - 7.39 (m, 2H), 7.04 - 6.97 (m, 2H), 4.05 (s, 2H), 3.85 (s, 3H).

**<sup>13</sup>C NMR** (150 MHz, CDCl<sub>3</sub>) δ 193.8, 161.6, 137.0, 135.6, 133.6, 130.7, 130.1, 129.6, 128.9, 118.0, 117.9, 115.4, 55.4, 22.3.

**HRMS-ESI** (m/z) [M+H]<sup>+</sup> calculated for C<sub>16</sub>H<sub>14</sub>NO<sub>2</sub>S 284.0740, found 284.0730.

*S*-(4-acetamidophenyl) 2-(cyanomethyl)benzothioate (**8**)

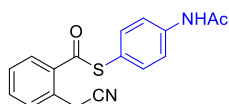

Following Procedure E, 2-(acetoxylimino)-2,3-dihydro-1*H*-inden-1-one (20.9 mg, 0.1 mmol) and *N*-(4-mercaptophenyl)acetamide (26.4 mg, 0.15 mmol) was used to afford the desired product.

6.6 mg, 22%. Light yellow solid.

R<sub>f</sub> = 0.41 (50% EA in PE)

**<sup>1</sup>H NMR** (600 MHz, DMSO-*d*<sub>6</sub>) δ 10.21 (s, 1H), 8.08 (d, J = 7.7 Hz, 1H), 7.74 - 7.70 (m, 3H), 7.63 - 7.58 (m, 2H), 7.46 (d, J = 8.5 Hz, 2H), 4.13 (s, 2H), 2.09 (s, 3H).

**<sup>13</sup>C NMR** (150 MHz, DMSO-*d*<sub>6</sub>) δ 192.4, 169.6, 141.5, 136.2, 135.8, 134.1, 131.7,

130.2, 129.7, 129.4, 120.4, 120.1, 118.9, 24.1, 21.6.

**HRMS-ESI** (m/z) [M+H]<sup>+</sup> calculated for C<sub>17</sub>H<sub>15</sub>N<sub>2</sub>O<sub>2</sub>S 311.0849, found 311.0849.

*S*-(4-fluorophenyl) 2-(cyanomethyl)benzothioate (**9**)

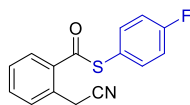

Following Procedure D, 2-(acetoxylimino)-2,3-dihydro-1*H*-inden-1-one (20.9 mg, 0.1 mmol) and 4-fluorobenzenethiol (19.6 mg, 0.15 mmol) was used to afford the desired product.

26.9 mg, 99%. White solid.

R<sub>f</sub> = 0.50 (20% EA in PE)

**<sup>1</sup>H NMR** (600 MHz, CDCl<sub>3</sub>) δ 8.13 (d, J = 7.8 Hz, 1H), 7.65 - 7.59 (m, 2H), 7.54 - 7.47 (m, 3H), 7.18 (t, J = 8.6 Hz, 2H), 4.05 (s, 2H).

**<sup>13</sup>C NMR** (150 MHz, CDCl<sub>3</sub>) δ 192.8, 164.4 (d, J = 250.9 Hz), 137.6 (d, J = 8.6 Hz), 135.4, 133.9, 130.8, 130.1, 129.8, 129.0, 122.8 (d, J = 3.4 Hz), 117.7, 117.08 (d, J = 22.2 Hz), 22.3.

**HRMS-ESI** (m/z) [M+Na]<sup>+</sup> calculated for C<sub>15</sub>H<sub>10</sub>FNOSNa 294.0359, found 294.0345.

*S*-(4-bromophenyl) 2-(cyanomethyl)benzothioate (**10**)

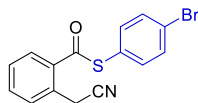

Following Procedure D, 2-(acetoxylimino)-2,3-dihydro-1*H*-inden-1-one (20.9 mg, 0.1 mmol) and 4-bromobenzenethiol (28.9 mg, 0.15 mmol) was used to afford the desired product.

29.4 mg, 88%. White solid.

R<sub>f</sub> = 0.36 (10% EA in PE)

**<sup>1</sup>H NMR** (600 MHz, CDCl<sub>3</sub>) δ 8.12 (d, J = 7.5 Hz, 1H), 7.63 - 7.57 (m, 4H), 7.53 - 7.49 (m, 1H), 7.40 - 7.35 (m, 2H), 4.04 (s, 2H).

**<sup>13</sup>C NMR** (150 MHz, CDCl<sub>3</sub>) δ 192.1, 136.9, 135.3, 133.9, 133.1, 130.9, 130.1, 129.8, 129.1, 126.6, 125.1, 117.7, 22.3.

**HRMS-ESI** (m/z) [M+Na]<sup>+</sup> calculated for C<sub>15</sub>H<sub>10</sub>BrNOSNa 353.9559, found 353.9544.

*S*-(3-bromophenyl) 2-(cyanomethyl)benzothioate (**11**)

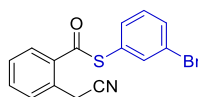

Following Procedure D, 2-(acetoxylimino)-2,3-dihydro-1*H*-inden-1-one (20.9 mg, 0.1 mmol) and 3-bromobenzenethiol (28.9 mg, 0.15 mmol) was used to afford the desired product.

31.9 mg, 96%. White solid.

R<sub>f</sub> = 0.35 (10% EA in PE)

**<sup>1</sup>H NMR** (600 MHz, CDCl<sub>3</sub>) δ 8.11 (d, J = 7.7 Hz, 1H), 7.68 (t, J = 1.7 Hz, 1H), 7.65 -

7.59 (m, 3H), 7.54 - 7.49 (m, 1H), 7.48 - 7.45 (m, 1H), 7.36 (t, J = 7.9 Hz, 1H), 4.05 (s, 2H).

$^{13}\text{C}$  NMR (150 MHz,  $\text{CDCl}_3$ )  $\delta$  191.9, 137.9, 135.3, 134.1, 134.0, 133.4, 131.1, 130.8, 130.2, 129.9, 129.5, 129.1, 123.2, 117.7, 22.3.

**HRMS-ESI** (m/z)  $[\text{M}+\text{Na}]^+$  calculated for  $\text{C}_{15}\text{H}_{10}\text{BrNOSNa}$  353.9559, found 353.9545.

*S*-(2-bromophenyl) 2-(cyanomethyl)benzothioate (**12**)

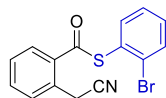

Following Procedure D, 2-(acetoxylimino)-2,3-dihydro-1*H*-inden-1-one (20.9 mg, 0.1 mmol) and 2-bromobenzenethiol (28.9 mg, 0.15 mmol) was used to afford the desired product.

29.9 mg, 90%. White solid.

$R_f$  = 0.35 (10% EA in PE)

$^1\text{H}$  NMR (600 MHz,  $\text{CDCl}_3$ )  $\delta$  8.16 (d, J = 7.5 Hz, 1H), 7.77 (dd, J = 8.0, 1.2 Hz, 1H), 7.67 - 7.60 (m, 3H), 7.55 - 7.49 (m, 1H), 7.42 (td, J = 7.6, 1.3 Hz, 1H), 7.35 (td, J = 7.8, 1.6 Hz, 1H), 4.06 (s, 2H).

$^{13}\text{C}$  NMR (150 MHz,  $\text{CDCl}_3$ )  $\delta$  191.1, 138.0, 135.4, 134.2, 133.9, 132.1, 130.6, 130.4, 130.1, 129.8, 129.4, 129.0, 128.6, 117.8, 22.2.

**HRMS-ESI** (m/z)  $[\text{M}+\text{Na}]^+$  calculated for  $\text{C}_{15}\text{H}_{10}\text{BrNOSNa}$  353.9559, found 353.9545.

*S*-(4-(trifluoromethyl)phenyl) 2-(cyanomethyl)benzothioate (**13**)

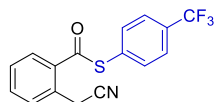

Following Procedure D, 2-(acetoxylimino)-2,3-dihydro-1*H*-inden-1-one (20.9 mg, 0.1 mmol) and 4-(trifluoromethyl)benzenethiol (27.3 mg, 0.15 mmol) was used to afford the desired product.

26.0 mg, 81%. White solid.

$R_f$  = 0.20 (10% EA in PE)

$^1\text{H}$  NMR (600 MHz,  $\text{CDCl}_3$ )  $\delta$  8.14 (d, J = 7.9 Hz, 1H), 7.73 (d, J = 8.2 Hz, 2H), 7.66 (d, J = 8.2 Hz, 2H), 7.63 (t, J = 8.2 Hz, 2H), 7.55 - 7.51 (m, 1H), 4.04 (s, 2H).

$^{13}\text{C}$  NMR (150 MHz,  $\text{CDCl}_3$ )  $\delta$  191.5, 135.7, 135.2, 134.1, 132.3, 132.2 (q, J = 32.9 Hz), 131.0, 130.2, 130.1, 129.1, 126.6 (q, J = 3.6 Hz), 124.1 (q, J = 272.4 Hz), 117.7, 22.4.

**HRMS-ESI** (m/z)  $[\text{M}+\text{Na}]^+$  calculated for  $\text{C}_{16}\text{H}_{10}\text{F}_3\text{NOSNa}$  344.0327, found 344.0314.

*S*-(4-cyanophenyl) 2-(cyanomethyl)benzothioate (**14**)

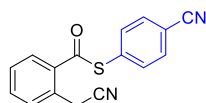

Following Procedure E, 2-(acetoxylimino)-2,3-dihydro-1*H*-inden-1-one (20.9 mg, 0.1 mmol) and 4-mercaptobenzonitrile (21.3 mg, 0.15 mmol) was used to afford the desired

product.

19.2 mg, 69%. White solid.

$R_f = 0.41$  (20% EA in PE)

$^1\text{H NMR}$  (600 MHz,  $\text{CDCl}_3$ )  $\delta$  8.12 (d,  $J = 7.8$  Hz, 1H), 7.75 (d,  $J = 8.1$  Hz, 2H), 7.67 - 7.64 (m, 3H), 7.62 (d,  $J = 7.5$  Hz, 1H), 7.54 (t,  $J = 7.5$  Hz, 1H), 4.04 (s, 2H).

$^{13}\text{C NMR}$  (150 MHz,  $\text{CDCl}_3$ )  $\delta$  190.8, 135.8, 135.0, 134.3, 134.0, 133.1, 131.1, 130.2, 130.0, 129.2, 118.5, 117.6, 113.8, 22.4.

**HRMS-ESI** (m/z)  $[\text{M}+\text{H}]^+$  calculated for  $\text{C}_{16}\text{H}_{11}\text{N}_2\text{OS}$  279.0587, found 279.0586.

#### Methyl 4-((2-(cyanomethyl)benzoyl)thio)benzoate (**15**)

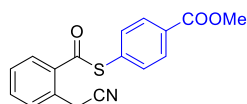

Following Procedure D, 2-(acetoxylimino)-2,3-dihydro-1*H*-inden-1-one (20.9 mg, 0.1 mmol) and methyl 4-mercaptobenzoate (29.7 mg, 0.15 mmol) was used to afford the desired product.

24.1 mg, 77%. White solid.

$R_f = 0.20$  (10% EA in PE)

$^1\text{H NMR}$  (600 MHz,  $\text{CDCl}_3$ )  $\delta$  8.13 (d,  $J = 8.3$  Hz, 3H), 7.66 - 7.62 (m, 2H), 7.61 (d,  $J = 8.1$  Hz, 2H), 7.55 - 7.51 (m, 1H), 4.05 (s, 2H), 3.95 (s, 3H).

$^{13}\text{C NMR}$  (150 MHz,  $\text{CDCl}_3$ )  $\delta$  191.7, 167.0, 135.4, 135.2, 134.1, 133.3, 131.7, 130.9, 130.8, 130.2, 129.9, 129.1, 117.8, 52.4, 22.4.

**HRMS-ESI** (m/z)  $[\text{M}+\text{H}]^+$  calculated for  $\text{C}_{17}\text{H}_{14}\text{NO}_3\text{S}$  312.0689, found 312.0690.

#### *S*-(3,5-dimethylphenyl) 2-(cyanomethyl)benzothioate (**16**)

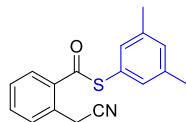

Following Procedure D, 2-(acetoxylimino)-2,3-dihydro-1*H*-inden-1-one (20.9 mg, 0.1 mmol) and 3,5-dimethylbenzenethiol (21.2 mg, 0.15 mmol) was used to afford the desired product.

23.8 mg, 85%. Yellow solid.

$R_f = 0.36$  (10% EA in PE)

$^1\text{H NMR}$  (600 MHz,  $\text{CDCl}_3$ )  $\delta$  8.14 (d,  $J = 7.7$  Hz, 1H), 7.65 - 7.58 (m, 2H), 7.50 (t,  $J = 7.4$  Hz, 1H), 7.15 (s, 2H), 7.11 (s, 1H), 4.07 (s, 2H), 2.38 (s, 6H).

$^{13}\text{C NMR}$  (150 MHz,  $\text{CDCl}_3$ )  $\delta$  193.7, 140.0, 136.2, 134.0, 133.4, 132.7, 131.0, 130.5, 130.0, 129.3, 127.2, 118.3, 22.6, 21.4.

**HRMS-ESI** (m/z)  $[\text{M}+\text{H}]^+$  calculated for  $\text{C}_{17}\text{H}_{16}\text{NOS}$  282.0947, found 282.0941.

#### *S*-(2,6-dimethylphenyl) 2-(cyanomethyl)benzothioate (**17**)

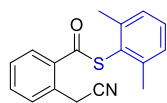

Following Procedure D, 2-(acetoxylimino)-2,3-dihydro-1*H*-inden-1-one (20.9 mg, 0.1

mmol) and 2,6-dimethylbenzenethiol (21.4 mg, 0.15 mmol) was used to afford the desired product.

24.3 mg, 87%. White solid.

$R_f = 0.37$  (10% EA in PE)

$^1\text{H NMR}$  (600 MHz,  $\text{CDCl}_3$ )  $\delta$  8.26 (d,  $J = 7.7$  Hz, 1H), 7.63 - 7.60 (m, 2H), 7.55 - 7.51 (m, 1H), 7.33 - 7.28 (m, 1H), 7.23 (d,  $J = 7.6$  Hz, 2H), 4.05 (s, 2H), 2.44 (s, 6H).

$^{13}\text{C NMR}$  (150 MHz,  $\text{CDCl}_3$ )  $\delta$  192.0, 143.6, 136.1, 133.6, 130.7, 130.4, 129.7, 129.0, 128.9, 126.9, 117.9, 22.2, 21.6.

**HRMS-ESI** (m/z)  $[\text{M}+\text{H}]^+$  calculated for  $\text{C}_{17}\text{H}_{16}\text{NOS}$  282.0947, found 282.0934.

#### S-(2,6-dichlorophenyl) 2-(cyanomethyl)benzothioate (**18**)

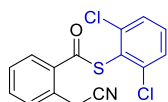

Following Procedure E, 2-(acetoxylimino)-2,3-dihydro-1*H*-inden-1-one (20.9 mg, 0.1 mmol) and 2,6-dichlorobenzenethiol (27.4 mg, 0.15 mmol) was used to afford the desired product.

20.0 mg, 62%. White solid.

$R_f = 0.23$  (10% EA in PE)

$^1\text{H NMR}$  (600 MHz,  $\text{CDCl}_3$ )  $\delta$  8.19 (d,  $J = 7.6$  Hz, 1H), 7.67 - 7.62 (m, 2H), 7.54 - 7.48 (m, 3H), 7.38 - 7.34 (m, 1H), 4.05 (s, 2H).

$^{13}\text{C NMR}$  (150 MHz,  $\text{CDCl}_3$ )  $\delta$  189.2, 141.6, 135.1, 134.0, 132.3, 130.6, 130.2, 129.9, 129.2, 129.0, 127.3, 117.6, 22.0.

**HRMS-ESI** (m/z)  $[\text{M}+\text{H}]^+$  calculated for  $\text{C}_{15}\text{H}_{10}\text{Cl}_2\text{NOS}$  321.9855, found 321.9852.

#### S-(naphthalen-2-yl) 2-(cyanomethyl)benzothioate (**19**)

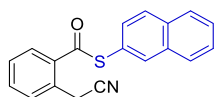

Following Procedure D, 2-(acetoxylimino)-2,3-dihydro-1*H*-inden-1-one (20.9 mg, 0.1 mmol) and 2,6-dimethylbenzenethiol (24.5 mg, 0.15 mmol) was used to afford the desired product.

14.4 mg, 47%. White solid.

$R_f = 0.19$  (10% EA in PE)

$^1\text{H NMR}$  (600 MHz,  $\text{CDCl}_3$ )  $\delta$  8.20 (d,  $J = 8.1$  Hz, 1H), 8.06 (s, 1H), 7.95 (d,  $J = 8.5$  Hz, 1H), 7.92 - 7.86 (m, 2H), 7.66 - 7.62 (m, 2H), 7.59 - 7.56 (m, 2H), 7.55 - 7.52 (m, 2H), 4.07 (s, 2H).

$^{13}\text{C NMR}$  (150 MHz,  $\text{CDCl}_3$ )  $\delta$  193.4, 136.1, 135.9, 134.5, 134.4, 134.2, 132.0, 131.1, 130.6, 130.1, 129.9, 129.4, 128.9, 128.7, 128.2, 127.5, 125.2, 118.2, 22.7.

**HRMS-ESI** (m/z)  $[\text{M}+\text{K}]^+$  calculated for  $\text{C}_{19}\text{H}_{13}\text{NOSK}$  342.0349, found 342.0337.

*S*-(4-chlorophenyl) 2-(cyanomethyl)-5-methylbenzothioate (**20**)

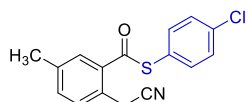

Following Procedure D, 2-(acetoxylimino)-6-methyl-2,3-dihydro-1*H*-inden-1-one (22.4 mg, 0.1 mmol) and 4-chlorobenzenethiol (22.1 mg, 0.15 mmol) was used to afford the desired product.

25.1 mg, 83%. White solid.

$R_f = 0.33$  (10% EA in PE)

$^1\text{H NMR}$  (600 MHz,  $\text{CDCl}_3$ )  $\delta$  7.92 (s, 1H), 7.48 (d,  $J = 7.8$  Hz, 1H), 7.46 - 7.40 (m, 5H), 3.98 (s, 2H), 2.47 (s, 3H).

$^{13}\text{C NMR}$  (150 MHz,  $\text{CDCl}_3$ )  $\delta$  192.3, 139.3, 136.8, 136.7, 135.2, 134.6, 130.8, 130.7, 130.1, 126.8, 126.1, 117.9, 22.0, 20.8.

**HRMS-ESI** ( $m/z$ )  $[\text{M}+\text{Na}]^+$  calculated for  $\text{C}_{16}\text{H}_{12}\text{ClNOSNa}$  324.0220, found 324.0206.

*S*-(4-chlorophenyl) 2-(cyanomethyl)-5-methoxybenzothioate (**21**)

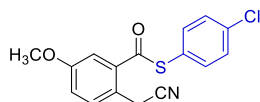

Following Procedure D, 2-(acetoxylimino)-6-methoxy-2,3-dihydro-1*H*-inden-1-one (24.0 mg, 0.1 mmol) and 4-chlorobenzenethiol (22.1 mg, 0.15 mmol) was used to afford the desired product.

25.7 mg, 81%. White solid.

$R_f = 0.40$  (20% EA in PE)

$^1\text{H NMR}$  (600 MHz,  $\text{CDCl}_3$ )  $\delta$  7.60 (d,  $J = 2.5$  Hz, 1H), 7.49 (d,  $J = 8.5$  Hz, 1H), 7.45 (s, 4H), 7.11 (dd,  $J = 8.5, 2.5$  Hz, 1H), 3.94 (s, 2H), 3.90 (s, 3H).

$^{13}\text{C NMR}$  (150 MHz,  $\text{CDCl}_3$ )  $\delta$  192.1, 160.0, 136.9, 136.7, 136.4, 132.1, 130.1, 126.0, 121.3, 118.6, 118.1, 115.9, 55.7, 21.5.

**HRMS-ESI** ( $m/z$ )  $[\text{M}+\text{Na}]^+$  calculated for  $\text{C}_{16}\text{H}_{12}\text{ClNO}_2\text{SNa}$  340.0169, found 340.0158.

*S*-(4-chlorophenyl) 2-(cyanomethyl)-4,5-dimethoxybenzothioate (**22**)

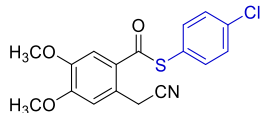

Following Procedure D, 2-(acetoxylimino)-5,6-dimethoxy-2,3-dihydro-1*H*-inden-1-one (27.1 mg, 0.1 mmol) and 4-chlorobenzenethiol (22.1 mg, 0.15 mmol) was used to afford the desired product.

29.7 mg, 86%. Yellow solid.

$R_f = 0.29$  (20% EA in PE)

$^1\text{H NMR}$  (600 MHz,  $\text{CDCl}_3$ )  $\delta$  7.61 (s, 1H), 7.46 - 7.41 (m, 4H), 7.05 (s, 1H), 4.03 (s, 2H), 3.99 (d,  $J = 4.5$  Hz, 6H).

$^{13}\text{C NMR}$  (150 MHz,  $\text{CDCl}_3$ )  $\delta$  190.6, 153.6, 148.9, 136.9, 136.8, 130.1, 127.1, 126.2, 124.3, 118.1, 113.1, 112.9, 56.4, 22.2.

**HRMS-ESI** (m/z) [M+Na]<sup>+</sup> calculated for C<sub>17</sub>H<sub>14</sub>ClNO<sub>3</sub>SNa 370.0275, found 370.0264.

**S-(4-chlorophenyl) 4-chloro-2-(cyanomethyl)benzothioate (23)**

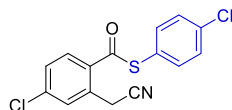

Following Procedure D, 2-(acetoxylimino)-5-chloro-2,3-dihydro-1*H*-inden-1-one (24.5 mg, 0.1 mmol) and 4-chlorobenzenethiol (22.1 mg, 0.15 mmol) was used to afford the desired product.

23.5 mg, 73%. Yellow solid.

R<sub>f</sub> = 0.50 (10% EA in PE)

<sup>1</sup>H NMR (600 MHz, CDCl<sub>3</sub>) δ 8.06 (d, J = 8.4 Hz, 1H), 7.62 (d, J = 1.8 Hz, 1H), 7.49 (dd, J = 8.4, 2.0 Hz, 1H), 7.47 – 7.42 (m, 4H), 4.03 (s, 2H).

<sup>13</sup>C NMR (150 MHz, CDCl<sub>3</sub>) δ 191.4, 140.4, 137.1, 136.7, 133.6, 131.8, 131.4, 131.0, 130.2, 129.2, 125.5, 117.1, 22.2.

**HRMS-ESI** (m/z) [M+Na]<sup>+</sup> calculated for C<sub>15</sub>H<sub>9</sub>Cl<sub>2</sub>NOSNa 343.9674, found 343.9661.

**S-(4-chlorophenyl) 3-bromo-2-(cyanomethyl)benzothioate (24)**

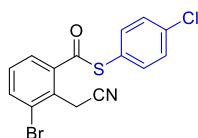

Following Procedure D, 2-(acetoxylimino)-4-bromo-2,3-dihydro-1*H*-inden-1-one (29.1 mg, 0.1 mmol) and 4-chlorobenzenethiol (22.1 mg, 0.15 mmol) was used to afford the desired product.

28.3 mg, 77%. White solid.

R<sub>f</sub> = 0.30 (10% EA in PE)

<sup>1</sup>H NMR (600 MHz, CDCl<sub>3</sub>) δ 7.98 (dd, J = 7.8, 1.1 Hz, 1H), 7.84 (dd, J = 8.1, 1.1 Hz, 1H), 7.49 - 7.44 (m, 4H), 7.38 (t, J = 7.9 Hz, 1H), 4.15 (s, 2H).

<sup>13</sup>C NMR (150 MHz, CDCl<sub>3</sub>) δ 192.3, 138.9, 137.7, 137.1, 136.6, 130.4, 130.2, 129.1, 128.8, 127.8, 125.6, 116.4, 21.6.

**HRMS-ESI** (m/z) [M+Na]<sup>+</sup> calculated for C<sub>15</sub>H<sub>9</sub>BrClNOSNa 387.9169, found 387.9155.

**S-(4-chlorophenyl) 4-bromo-2-(cyanomethyl)benzothioate (25)**

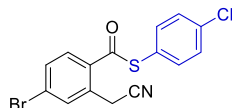

Following Procedure D, 2-(acetoxylimino)-5-bromo-2,3-dihydro-1*H*-inden-1-one (29.1 mg, 0.1 mmol) and 4-chlorobenzenethiol (22.1 mg, 0.15 mmol) was used to afford the desired product.

29.7 mg, 81%. White solid.

R<sub>f</sub> = 0.37 (10% EA in PE)



**<sup>1</sup>H NMR** (600 MHz, CDCl<sub>3</sub>) δ 7.98 (d, J = 8.4 Hz, 1H), 7.78 (d, J = 1.5 Hz, 1H), 7.66 (dd, J = 8.3, 1.7 Hz, 1H), 7.48 - 7.41 (m, 4H), 4.02 (s, 2H).

**<sup>13</sup>C NMR** (150 MHz, CDCl<sub>3</sub>) δ 191.6, 137.1, 136.7, 134.1, 134.0, 132.3, 131.8, 131.4, 130.2, 128.8, 125.5, 117.1, 22.1.

**HRMS-ESI** (m/z) [M+Na]<sup>+</sup> calculated for C<sub>15</sub>H<sub>9</sub>BrClNOSNa 387.9169, found 387.9152.

*S*-(4-chlorophenyl) 5-bromo-2-(cyanomethyl)benzothioate (**26**)

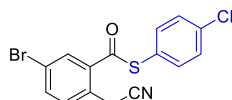

Following Procedure D, 2-(acetoxylimino)-6-bromo-2,3-dihydro-1*H*-inden-1-one (29.1 mg, 0.1 mmol) and 4-chlorobenzenethiol (22.1 mg, 0.15 mmol) was used to afford the desired product.

23.0 mg, 77%. White solid.

R<sub>f</sub> = 0.27 (10% EA in PE)

**<sup>1</sup>H NMR** (600 MHz, CDCl<sub>3</sub>) δ 8.20 (d, J = 2.0 Hz, 1H), 7.74 (dd, J = 8.2, 2.0 Hz, 1H), 7.49 (d, J = 8.3 Hz, 1H), 7.47 - 7.42 (m, 4H), 3.97 (s, 2H).

**<sup>13</sup>C NMR** (150 MHz, CDCl<sub>3</sub>) δ 191.2, 137.2, 137.1, 136.7, 136.6, 132.8, 132.4, 130.3, 128.6, 125.4, 122.8, 117.2, 21.9.

**HRMS-ESI** (m/z) [M+Na]<sup>+</sup> calculated for C<sub>15</sub>H<sub>9</sub>BrClNOSNa 387.9169, found 387.9154.

*S*-(4-chlorophenyl) 2-(cyanomethyl)-3-(trifluoromethyl)benzothioate (**27**)

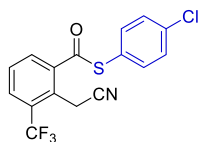

Following Procedure D, 2-(acetoxylimino)-4-(trifluoromethyl)-2,3-dihydro-1*H*-inden-1-one (22.9 mg, 0.1 mmol) and 4-chlorobenzenethiol (22.1 mg, 0.15 mmol) was used to afford the desired product.

20.5 mg, 58%. White solid.

R<sub>f</sub> = 0.26 (10% EA in PE)

**<sup>1</sup>H NMR** (600 MHz, CDCl<sub>3</sub>) δ 8.19 (d, J = 7.7 Hz, 1H), 7.94 (d, J = 7.9 Hz, 1H), 7.66 (t, J = 7.9 Hz, 1H), 7.52 - 7.45 (m, 4H), 4.10 (s, 2H).

**<sup>13</sup>C NMR** (150 MHz, CDCl<sub>3</sub>) δ 192.6, 139.4, 137.3, 136.7, 132.9, 131.4 (q, J = 30.8 Hz), 130.5 (q, J = 5.6 Hz), 130.3, 129.6, 128.1, 125.3, 123.8 (q, J = 274.7 Hz), 116.4, 17.6, 17.6.

**HRMS-ESI** (m/z) [M+Na]<sup>+</sup> calculated for C<sub>16</sub>H<sub>9</sub>ClF<sub>3</sub>NOSNa 377.9938, found 377.9924.

*S*-(4-chlorophenyl) 2-(2-cyanopropan-2-yl)benzothioate (**28**)

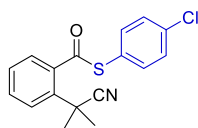

Following Procedure E, 2-(acetoxylimino)-3,3-dimethyl-2,3-dihydro-1*H*-inden-1-one (24.4 mg, 0.1 mmol) and 4-chlorobenzenethiol (22.1 mg, 0.15 mmol) was used to afford the desired product.

10.9 mg, 35%. White solid.

$R_f$  = 0.62 (20% EA in PE)

$^1\text{H NMR}$  (600 MHz,  $\text{CDCl}_3$ )  $\delta$  7.80 (d,  $J$  = 7.6 Hz, 1H), 7.58 – 7.53 (m, 4H), 7.47 – 7.42 (m, 3H), 1.87 (s, 6H).

$^{13}\text{C NMR}$  (150 MHz,  $\text{CDCl}_3$ )  $\delta$  195.1, 139.2, 138.0, 136.8, 136.7, 132.6, 130.1, 129.8, 128.3, 126.9, 126.5, 124.4, 36.6, 29.5.

**HRMS-ESI** ( $m/z$ ) [ $M+H$ ] $^+$  calculated for  $\text{C}_{17}\text{H}_{15}\text{ClNOS}$  316.0557, found 316.0559

*S*-(4-chlorophenyl) 8-cyanonaphthalene-1-carbothioate (**29**)

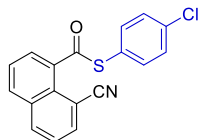

Following Procedure D, (*E*)-2-(acetoxylimino)acenaphthylen-1(2*H*)-one (24.7 mg, 0.1 mmol) and 4-chlorobenzenethiol (22.1 mg, 0.15 mmol) was used to afford the desired product.

20.5 mg, 63%. Yellow solid.

$R_f$  = 0.41 (20% EA in PE)

$^1\text{H NMR}$  (400 MHz,  $\text{CDCl}_3$ )  $\delta$  8.12 (d,  $J$  = 8.3 Hz, 1H), 8.06 - 8.00 (m, 2H), 7.94 (d,  $J$  = 7.1 Hz, 1H), 7.70 (d,  $J$  = 7.8 Hz, 2H), 7.61 (dt,  $J$  = 15.5, 7.7 Hz, 2H), 7.47 (d,  $J$  = 7.9 Hz, 2H).

$^{13}\text{C NMR}$  (100 MHz,  $\text{CDCl}_3$ )  $\delta$  193.2, 137.5, 137.2, 137.2, 136.9, 134.9, 134.7, 133.4, 130.5, 129.7, 128.1, 127.0, 126.7, 126.6, 118.9, 109.2.

**HRMS-ESI** ( $m/z$ ) [ $M+H$ ] $^+$  calculated for  $\text{C}_{18}\text{H}_{11}\text{ClNOS}$  324.0244, found 324.0246.

*S*-(4-chlorophenyl) 2-cyanatobenzothioate (**30**)

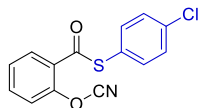

Following Procedure D, *S*-(4-chlorophenyl) 2-cyanatobenzothioate (21.6 mg, 0.1 mmol) and 4-chlorobenzenethiol (22.1 mg, 0.15 mmol) was used to afford the desired product.

2.9 mg, 14%. White solid.

$R_f$  = 0.50 (10% EA in PE)

$^1\text{H NMR}$  (600 MHz,  $\text{CDCl}_3$ )  $\delta$  7.76 (d,  $J$  = 7.8 Hz, 1H), 7.73 - 7.69 (m, 1H), 7.56 (d,  $J$  = 8.5 Hz, 2H), 7.40 - 7.36 (m, 2H), 7.30 - 7.26 (m, 2H).

$^{13}\text{C NMR}$  (150 MHz,  $\text{CDCl}_3$ )  $\delta$  176.8, 163.9, 146.7, 139.0, 135.6, 134.0, 129.7, 127.5,

125.7, 125.2, 121.6, 113.4.

**HRMS-ESI** (m/z) [M+H]<sup>+</sup> calculated for C<sub>14</sub>H<sub>9</sub>ClNO<sub>2</sub>S 290.0037, found 290.0036.

*S*-(4-chlorophenyl) 2-(3-cyanopropyl)benzothioate (**31**)

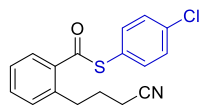

Following Procedure E, (*E*)-6-(acetoxymino)-6,7,8,9-tetrahydro-5*H*-benzo[7]annulen-5-one (24.4 mg, 0.1 mmol) and 4-chlorobenzenethiol (22.1 mg, 0.15 mmol) was used to afford the desired product.

20.9 mg, 66%. Yellow solid.

R<sub>f</sub> = 0.58 (10% EA in PE)

<sup>1</sup>H NMR (600 MHz, CDCl<sub>3</sub>) δ 7.97 (dd, J = 7.8, 1.1 Hz, 1H), 7.51 (td, J = 7.6, 1.3 Hz, 1H), 7.47 – 7.42 (m, 4H), 7.38 (td, J = 7.7, 1.1 Hz, 1H), 7.32 (d, J = 7.6 Hz, 1H), 2.93 (t, 2H), 2.33 (t, J = 7.2 Hz, 2H), 2.00 - 1.94 (m, 2H).

<sup>13</sup>C NMR (150 MHz, CDCl<sub>3</sub>) δ 192.7, 139.8, 136.9, 136.6, 136.6, 133.1, 131.7, 130.1, 129.6, 127.3, 126.8, 119.9, 32.5, 27.0, 16.5.

**HRMS-ESI** (m/z) [M+H]<sup>+</sup> calculated for C<sub>17</sub>H<sub>15</sub>ClNOS 316.0557, found 316.0558.

## IV . One-pot Protocol

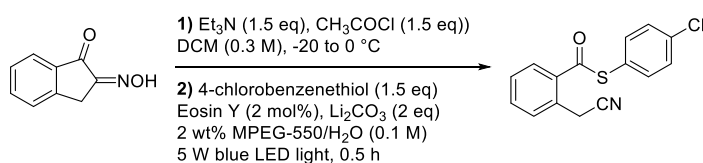

To a mixture of 2-(hydroxyimino)-2,3-dihydro-1*H*-inden-1-one (0.2 mmol, 33.2 mg), DCM (0.6 mL), Et<sub>3</sub>N (42.2 μL, 0.3 mmol) in a 5 mL tube was added acetyl chloride (21.8 μL, 0.3 mmol) dropwise at -20 °C and the mixture was stirred at 0 °C for 2 h. The solvent was then removed in vacuo to give the crude oxime, which was directly used in the next step without further purification.

A mixture of the crude oxime acetate 1 (0.2 mmol), 4-chlorobenzenethiol (0.3 mmol, 44.2 mg), Eosin Y (2.6 mg, 2 mol%) and Li<sub>2</sub>CO<sub>3</sub> (0.3 mmol, 29.9 mg,) in a 5 mL tube was added 2 wt% MPEG-550/H<sub>2</sub>O (2 mL). The reaction mixture was stirred under the irradiation of 2×5 W Blue LEDs (λ = 440 - 480nm) at room temperature for 0.5 h. The reaction mixture was quenched by EtOAc and concentrated in vacuo. The crude was purified by flash chromatography (petroleum ether/ethyl acetate = 100/1 - 10/1) on silica gel to provide the corresponding products (48.0 mg, 84%).

## V . Derivatization of compound 3

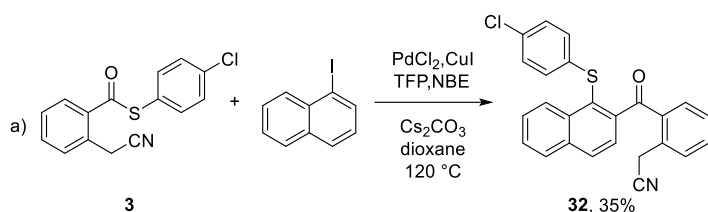

According to literature 6, to a 10 mL Schlenk tube was sequentially added 1-iodonaphthalene (30  $\mu$ L, 0.20 mmol), thioester **3** (87.2 mg, 0.30 mmol), PdCl<sub>2</sub> (3.6 mg, 0.02 mmol), TFP (11.9 mg, 0.05 mmol), CuI (7.8 mg, 0.04 mmol), norbornene (57.1 mg, 0.60 mmol), Cs<sub>2</sub>CO<sub>3</sub> (197.5 mg, 0.60 mmol) and 1,4-dioxane (3.0 mL). The mixture was stirred at 120 °C for 12 h afforded **32** (29.3 mg, 35%).

<sup>1</sup>H NMR (400 MHz, CDCl<sub>3</sub>)  $\delta$  8.37 (d, J = 7.9 Hz, 1H), 8.10 (d, J = 8.3 Hz, 1H), 7.98 (d, J = 7.6 Hz, 1H), 7.68 - 7.55 (m, 4H), 7.46 (t, J = 7.5 Hz, 1H), 7.22 (d, J = 7.7 Hz, 1H), 7.11 (t, J = 7.5 Hz, 1H), 7.02 (d, J = 8.0 Hz, 2H), 6.76 (d, J = 8.0 Hz, 2H), 4.27 (s, 2H).

<sup>13</sup>C NMR (100 MHz, CDCl<sub>3</sub>)  $\delta$  199.9, 146.0, 136.9, 136.4, 135.6, 135.4, 133.8, 133.3, 132.5, 132.3, 131.9, 130.9, 129.9, 129.8, 129.5, 128.80, 128.75, 128.6, 127.0, 126.7, 125.4, 118.8, 23.0.

HRMS-ESI (m/z) [M+Na]<sup>+</sup> calculated for C<sub>25</sub>H<sub>16</sub>ClNOSNa 436.0533, found 436.0516.

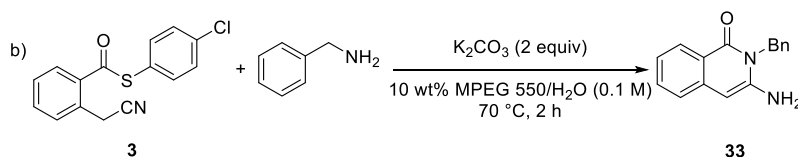

To a 4 mL vial, thioester **3** (29.1 mg, 0.1 mmol), benzylamine (22.3  $\mu$ L, 0.2 mmol), K<sub>2</sub>CO<sub>3</sub> (27.9 mg, 0.2 mmol) and 10 wt%MPEG-550/H<sub>2</sub>O (1 mL) were added with a stir bar. The resulting mixture was allowed to stir at 70 °C for 2 h. Then, the reaction was cooled to rt, the reaction mixture was extracted with EtOAc. The organic phase was dried over Na<sub>2</sub>SO<sub>4</sub>, evaporated in vacuo and subjected to flash column chromatography on silica gel to obtain compound **33** (23.5 mg, 94%).

<sup>1</sup>H NMR (600 MHz, DMSO-d<sub>6</sub>)  $\delta$  7.97 (d, J = 7.8 Hz, 1H), 7.45 - 7.41 (m, 1H), 7.30 (t, J = 7.5 Hz, 2H), 7.25 - 7.22 (m, 2H), 7.19 (d, J = 7.4 Hz, 2H), 7.02 (t, J = 7.5 Hz, 1H), 5.98 (s, 2H), 5.69 (s, 1H), 5.34 (s, 2H).

<sup>13</sup>C NMR (150 MHz, DMSO-d<sub>6</sub>)  $\delta$  162.7, 147.8, 140.2, 137.8, 132.8, 128.9, 128.0, 127.4, 127.2, 123.7, 121.4, 118.5, 82.8, 43.8.

HRMS-ESI (m/z) [M+H]<sup>+</sup> calculated for C<sub>16</sub>H<sub>15</sub>N<sub>2</sub>O 251.1179, found 251.1178.

Spectroscopic data matches that reported in the literature.<sup>7</sup>

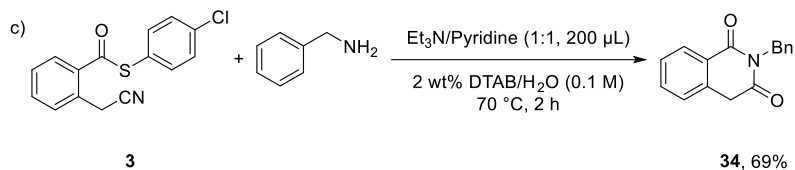

To a 4 mL vial, thioester **3** (29.1 mg, 0.1 mmol), benzylamine (22.3  $\mu$ L, 0.2 mmol),  $\text{Et}_3\text{N}$ /pyridine (1:1, 200  $\mu$ L) and 2 wt% DTAB/ $\text{H}_2\text{O}$  (1 mL) (DTAB = dodecyltrimethylammonium bromide) were added with a stir bar. The resulting mixture was allowed to stir at 70  $^\circ\text{C}$  for 2 h. Then, the reaction was cooled to rt, 1 M HCl was added to the reaction mixture and extracted with EtOAc. The organic phase was dried over  $\text{Na}_2\text{SO}_4$ , evaporated in vacuo and subjected to flash column chromatography on silica gel to obtain compound **34** (17.3 mg, 69%).

$^1\text{H NMR}$  (600 MHz,  $\text{CDCl}_3$ )  $\delta$  8.21 (d,  $J = 7.9$  Hz, 1H), 7.57 (t,  $J = 7.5$  Hz, 1H), 7.46 (d,  $J = 7.5$  Hz, 2H), 7.43 (t,  $J = 7.6$  Hz, 1H), 7.29 (t,  $J = 7.5$  Hz, 2H), 7.24 (dd,  $J = 12.8, 7.1$  Hz, 2H), 5.19 (s, 2H), 4.06 (s, 2H).

$^{13}\text{C NMR}$  (150 MHz,  $\text{CDCl}_3$ )  $\delta$  170.6, 165.5, 137.5, 134.5, 134.2, 129.7, 129.4, 128.9, 128.2, 128.0, 127.5, 125.8, 43.2, 36.4.

**HRMS-ESI** ( $m/z$ )  $[\text{M}+\text{H}]^+$  calculated for  $\text{C}_{16}\text{H}_{14}\text{NO}_2$  252.1019, found 252.1017.

Spectroscopic data matches that reported in the literature.<sup>8</sup>

## VI . Recycle Study and E Factor Calculation

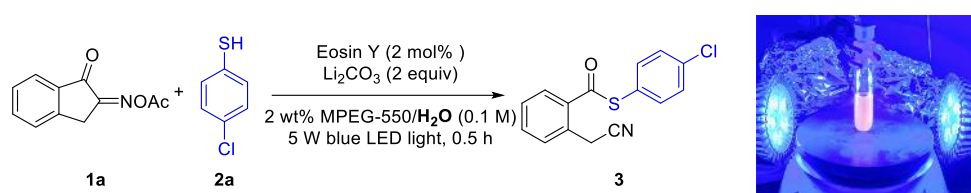

A mixture of 1-indanone oxime acetate **1a** (0.5 mmol, 104.8 mg), 4-chlorobenzenethiol **2a** (0.75 mmol, 110.8 mg), Eosin Y (6.6 mg, 2 mol%) and Li<sub>2</sub>CO<sub>3</sub> (0.2 mmol, 74.6 mg) in a 10 mL tube was added 2 wt% MPEG-550/H<sub>2</sub>O (5 mL). The reaction mixture was stirred under the irradiation of 2×5 W Blue LEDs ( $\lambda = 440 - 480\text{nm}$ ) at room temperature for 0.5 h. Then the reaction mixture was extracted by EtOAc (1 mL) for two times. The combined organic layer was concentrated under reduced pressure and purified by flash chromatography on silica gel to provide the corresponding products **3**. Reuse of the solvent: 1-indanone oxime acetate **1a** (0.5 mmol, 104.8 mg), 4-chlorobenzenethiol **2a** (0.5 mmol, 1.0 equiv) and Li<sub>2</sub>CO<sub>3</sub> (0.5 mmol, 37.4 mg,) were added to the solvent, while no additional Eosin Y was required.

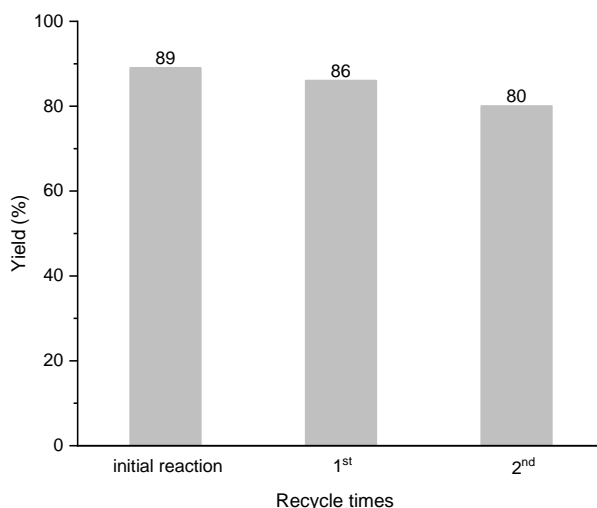

**Figure S2** The yield of each run for recycle experiment

**Note:** Density of each liquid at 25 °C; ethyl acetate = 0.897 g/mL;  
Mol. Wt.; 4-chlorobenzenethiol **2a** = 144.62 mg/mmol; *S*-(4-chlorophenyl) 2-(cyanomethyl)benzothioate (**3**) = 287.76 mg/mmol

Total organic wastes:

4 mL EtOAc (3588.0 mg)

0.54 mmol 4-chlorobenzenethiol **2a** (78.1 mg)

Product (**3**): 128.3 + 123.4 + 115.7 = 367.4 mg

$$\begin{aligned} \mathbf{E\ Factor} &= \frac{\text{total organic wastes (Kg)}}{\text{Product (Kg)}} \\ &= \frac{3588 + 78.1 \text{ (mg)}}{367.4 \text{ (mg)}} \\ &= 10.0 \end{aligned}$$



## VII . Mechanistic Studies

### a) Control experiments

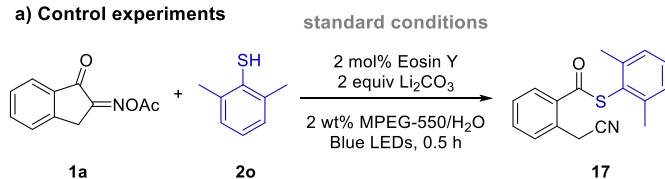

| Entry | Variation from the above           | Yield |
|-------|------------------------------------|-------|
| 1     | none                               | 87%   |
| 2     | no light                           | 0%    |
| 3     | no Eosin Y                         | 0%    |
| 4     | no Li <sub>2</sub> CO <sub>3</sub> | 0%    |

### b) Radical trapping reaction

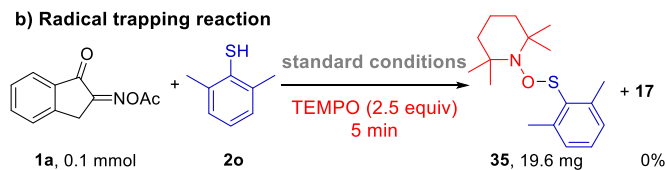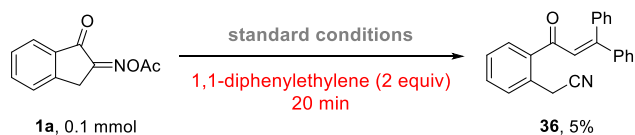

### c) Proposed reaction mechanism.

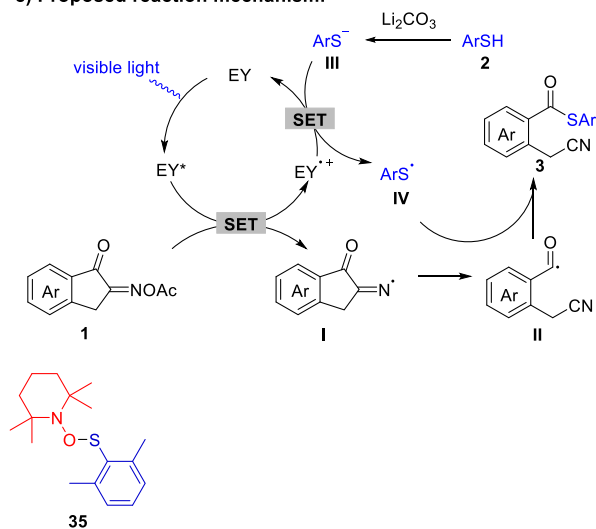

<sup>1</sup>H NMR (600 MHz, CDCl<sub>3</sub>) δ 7.12 (t, J = 7.5 Hz, 1H), 6.94 (d, J = 7.5 Hz, 2H), 2.62 (s, 6H), 1.70 (s, 6H), 1.13 (s, 6H), 1.05 (s, 6H).

<sup>13</sup>C NMR (150 MHz, CDCl<sub>3</sub>) δ 142.6, 138.5, 131.4, 130.0, 62.4, 42.7, 38.8, 31.8, 31.3, 30.3, 21.9, 20.2, 16.8, 16.7.

HRMS-ESI (m/z) [M+H]<sup>+</sup> calculated for C<sub>17</sub>H<sub>28</sub>NOS 316.0557, found 316.0558.

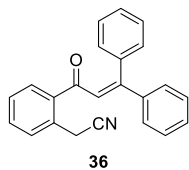

**<sup>1</sup>H NMR** (600 MHz, CDCl<sub>3</sub>) δ 7.76 (dd, J = 7.7, 0.7 Hz, 1H), 7.47 (d, J = 7.7 Hz, 1H), 7.42 - 7.36 (m, 6H), 7.28 - 7.22 (m, 4H), 7.14 - 7.10 (m, 2H), 6.95 (s, 1H), 4.05 (s, 2H).

**<sup>13</sup>C NMR** (150 MHz, CDCl<sub>3</sub>) δ 196.3, 156.4, 141.1, 139.2, 137.5, 132.5, 131.0, 130.6, 130.2, 130.2, 130.1, 129.2, 129.04, 128.97, 128.6, 128.1, 126.2, 118.4, 21.9.

Spectroscopic data matches that reported in the literature.<sup>9</sup>

## VIII . Crystal Data for 18 and 33

### Crystal Data for 18

A suitable crystal was selected and then tested on a SuperNova, Dual, Mo at zero, AtlasS2 diffractometer. The crystal was kept at 100.0(2) K during data collection.

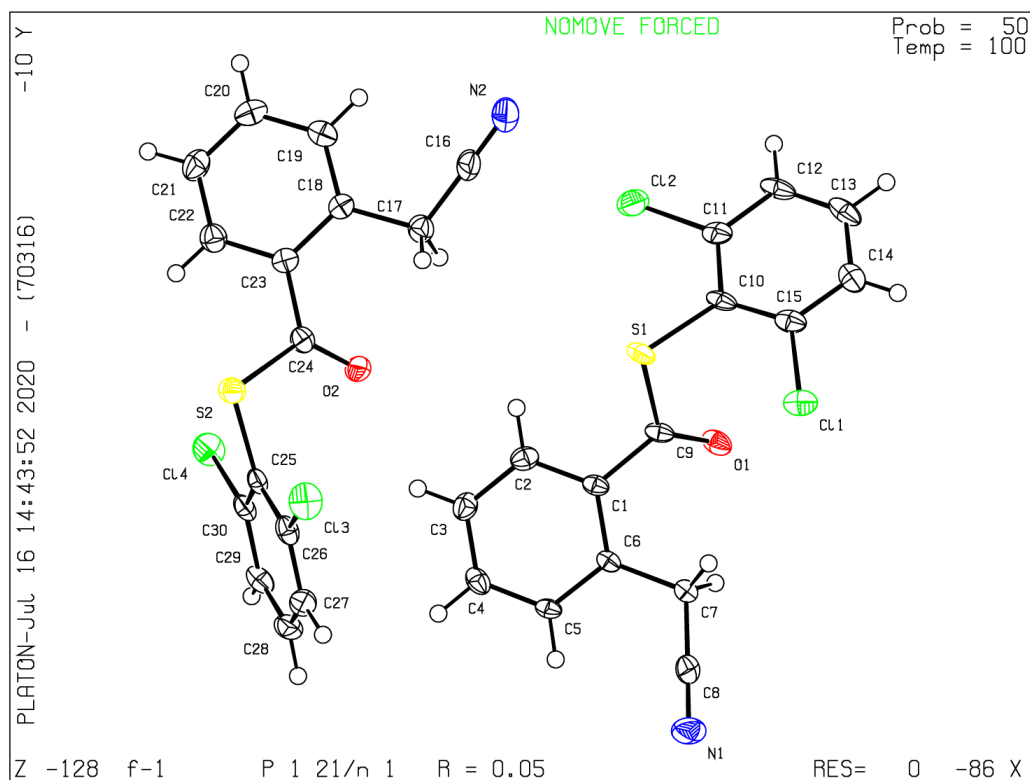

CCDC 2175261

X-ray structure and CCDC number of **18**

Crystal data and structure refinement for **18**

|                     |                                                    |
|---------------------|----------------------------------------------------|
| Identification code | F-1                                                |
| Empirical formula   | C <sub>15</sub> H <sub>9</sub> Cl <sub>2</sub> NOS |
| Formula weight      | 322.19                                             |
| Temperature/K       | 100.0(2)                                           |
| Crystal system      | monoclinic                                         |
| Space group         | P2 <sub>1</sub> /n                                 |
| a/Å                 | 16.3755(11)                                        |
| b/Å                 | 7.2951(4)                                          |
| c/Å                 | 23.9248(14)                                        |
| α/°                 | 90                                                 |
| β/°                 | 103.152(7)                                         |
| γ/°                 | 90                                                 |

|                                             |                                                               |
|---------------------------------------------|---------------------------------------------------------------|
| Volume/Å <sup>3</sup>                       | 2783.1(3)                                                     |
| Z                                           | 8                                                             |
| ρ <sub>calc</sub> /cm <sup>3</sup>          | 1.538                                                         |
| μ/mm <sup>-1</sup>                          | 0.609                                                         |
| F(000)                                      | 1312.0                                                        |
| Crystal size/mm <sup>3</sup>                | 0.14 × 0.13 × 0.12                                            |
| Radiation                                   | Mo Kα (λ = 0.71073)                                           |
| 2θ range for data collection/°              | 5.11 to 50                                                    |
| Index ranges                                | -17 ≤ h ≤ 19, -8 ≤ k ≤ 8, -23 ≤ l ≤ 28                        |
| Reflections collected                       | 11896                                                         |
| Independent reflections                     | 4906 [R <sub>int</sub> = 0.0597, R <sub>sigma</sub> = 0.0718] |
| Data/restraints/parameters                  | 4906/0/361                                                    |
| Goodness-of-fit on F <sup>2</sup>           | 1.035                                                         |
| Final R indexes [I ≥ 2σ (I)]                | R <sub>1</sub> = 0.0470, wR <sub>2</sub> = 0.1070             |
| Final R indexes [all data]                  | R <sub>1</sub> = 0.0609, wR <sub>2</sub> = 0.1170             |
| Largest diff. peak/hole / e Å <sup>-3</sup> | 0.34/-0.35                                                    |

## Crystal Data for 33

A suitable crystal was selected and then tested on a SuperNova, Dual, Cu at zero, AtlasS2 diffractometer. The crystal was kept at 150.01(10) K during data collection.

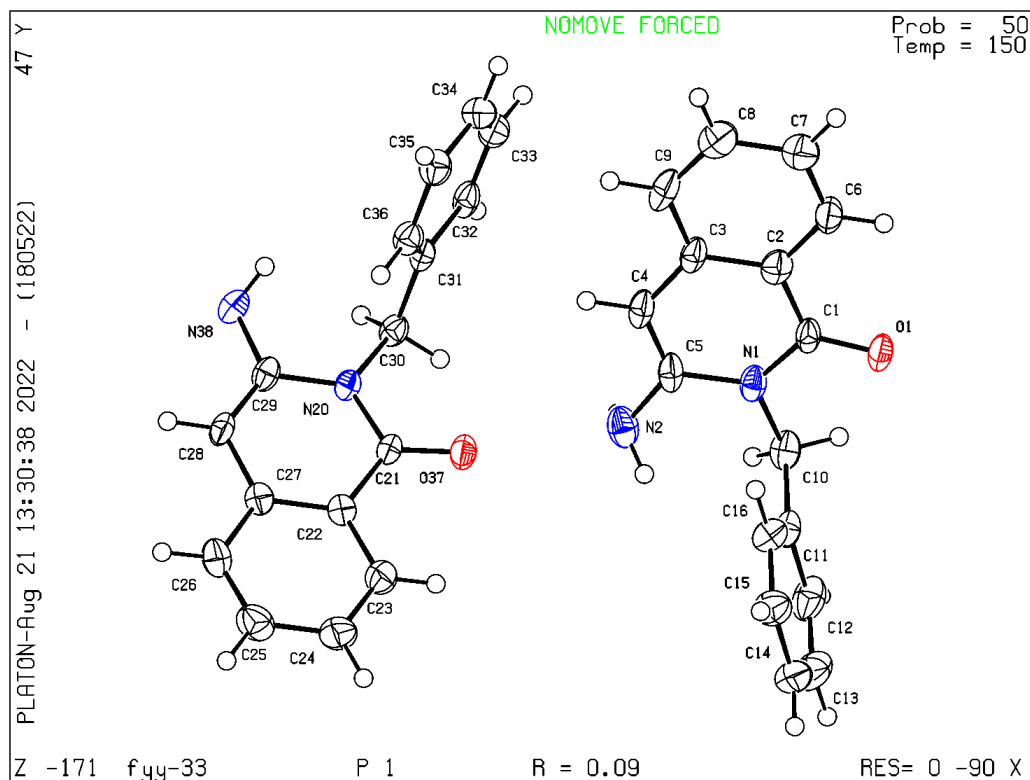

CCDC 2202642

X-ray structure and CCDC number of **33**

Crystal data and structure refinement for **33**.

Identification code fyy-33

Empirical formula  $C_{16}H_{14}N_2O$

Formula weight 250.29

Temperature/K 150.01(10)

Crystal system triclinic

Space group P1

$a/\text{\AA}$  5.7192(2)

$b/\text{\AA}$  10.2210(7)

$c/\text{\AA}$  11.4399(8)

$\alpha/^\circ$  79.456(6)

$\beta/^\circ$  89.714(5)

$\gamma/^\circ$  76.365(5)

Volume/ $\text{\AA}^3$  638.40(7)

Z 2

$\rho_{\text{calc}}/\text{cm}^3$  1.302  
 $\mu/\text{mm}^{-1}$  0.657  
F(000) 264.0  
Crystal size/ $\text{mm}^3$   $0.14 \times 0.12 \times 0.11$   
Radiation Cu K $\alpha$  ( $\lambda = 1.54184$ )  
2 $\Theta$  range for data collection/ $^\circ$  7.868 to 143.1  
Index ranges  $-6 \leq h \leq 6, -8 \leq k \leq 12, -13 \leq l \leq 14$   
Reflections collected 5417  
Independent reflections 3054 [Rint = 0.0367, Rsigma = 0.0538]  
Data/restraints/parameters 3054/3/345  
Goodness-of-fit on  $F^2$  1.308  
Final R indexes [ $I \geq 2\sigma(I)$ ]  $R_1 = 0.0868, wR_2 = 0.2769$   
Final R indexes [all data]  $R_1 = 0.0883, wR_2 = 0.2790$   
Largest diff. peak/hole /  $e \text{ \AA}^{-3}$  0.73/-0.39  
Flack parameter -0.2(4)

## IX . References

1. X. Meng, D. Chen, R. Liu, P. Jiang and S. Huang. *J. Org. Chem.*, 2021, **86**, 10852.
2. Y. Fu, X. Zhao, D. Chen, J. Luo and S. Huang. *Chem. Commun.*, 2021, **57**, 10719.
3. A. E. Cotman, M. Lozinšek, B. Wang, M. Stephan and B. Mohar. *Org. Lett.* 2019, **21**, 3644.
4. D. Chen, Y. Wang, X.-M. Cai, X. Cao, P. Jiang, F. Wang and S. Huang. *Org. Lett.* 2020, **22**, 6847.
5. Y.-E. Qian, L. Zheng, Q.-L. Zhao, J.-A. Xiao, K. Chen, H.-Y. Xiang and H. Yang. *Chem. Commun.*, 2021, **57**, 12285.
6. F. Sun, M. Li, C. He, B. Wang, B. Li, X. Sui and Z. Gu. *J. Am. Chem. Soc.* 2016, **138**, 7456.
7. L. M. Potikha, R. M. Gutsul, V. A. Kovtunencko and A. A. Tolmachev, *Chem. Heterocycl. Compd.* 2010, **46**, 457.
8. S. H. Kennedy, M. N. Schaeff and D. A. Klumpp. *J. Org. Chem.* 2019, **84**, 14133.
9. B.-Q. He, Y. Gao, P.-Z. Wang, H. Wu, H.-B. Zhou, X.-P. Liu and J.-R. Chen. *Synlett.* 2021; **32**, 373.

# X . NMR Spectra

8.35  
8.34  
8.16  
8.14  
8.09  
8.07  
8.06  
8.05  
7.77  
7.75  
7.74

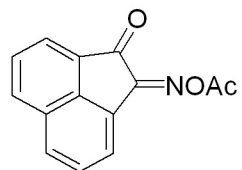

1k

—2.48

| Parameter              | Value |
|------------------------|-------|
| Solvent                | CDCl3 |
| Spectrometer Frequency | 600   |

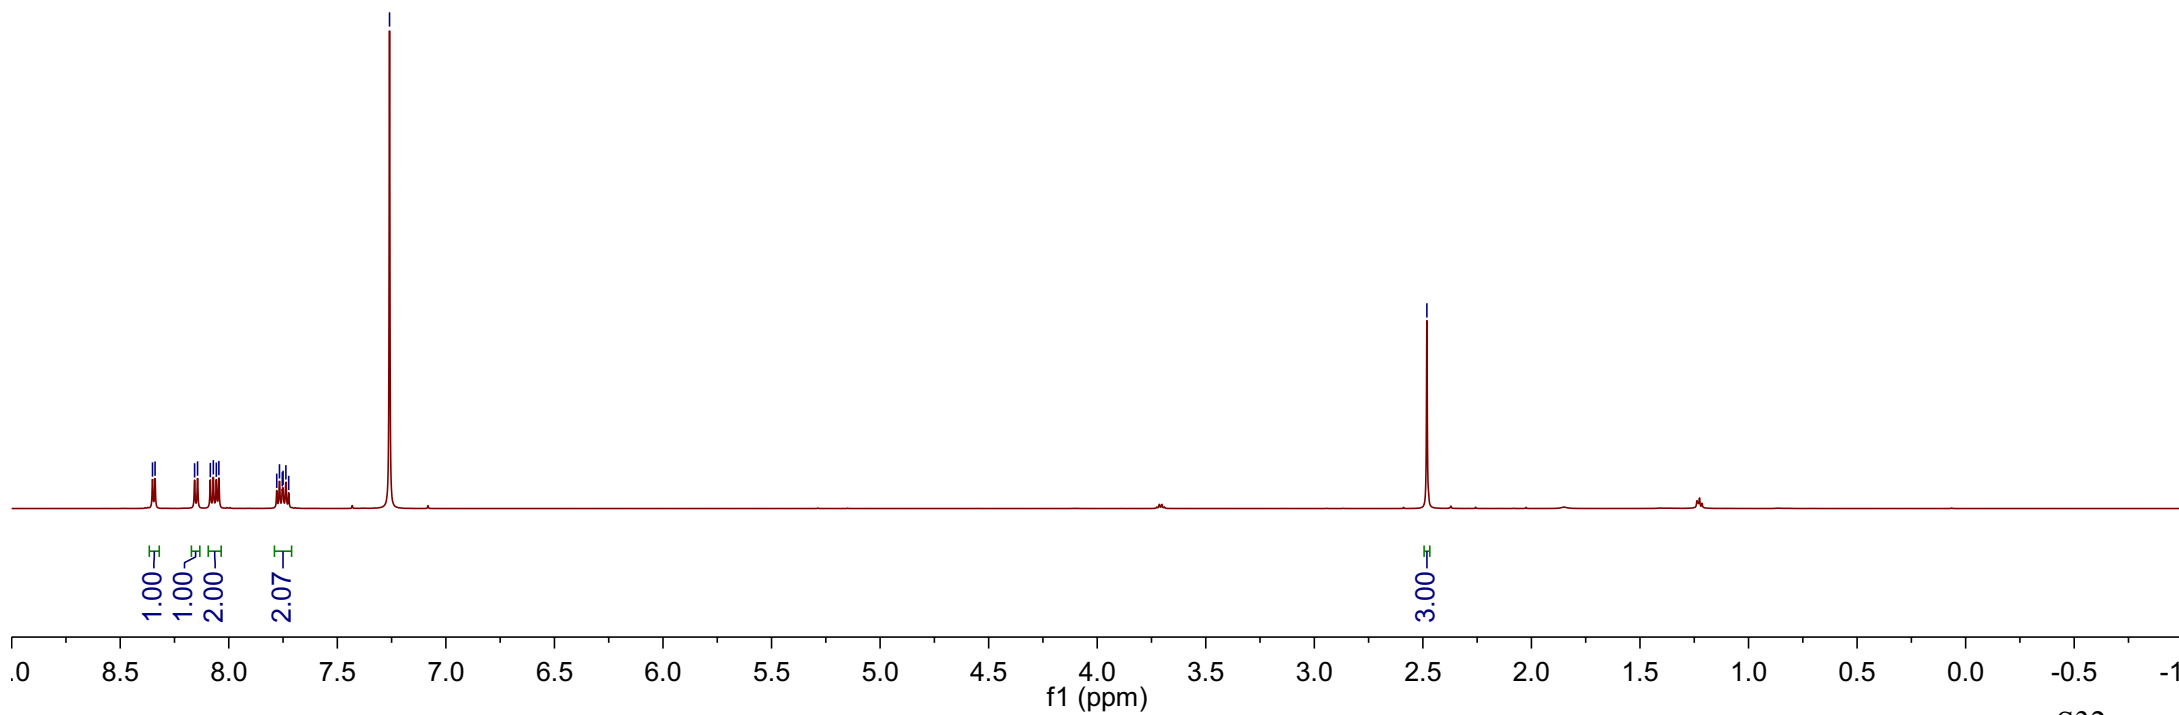



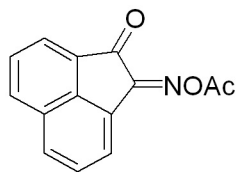

**1k**

—187.78      —169.50      —153.39      —142.29  
 —132.63      —131.56      —131.04      —130.29      —129.05      —128.85      —127.41      —125.91      —123.21

—19.39

| Parameter              | Value             |
|------------------------|-------------------|
| Solvent                | CDCl <sub>3</sub> |
| Spectrometer Frequency | 150               |

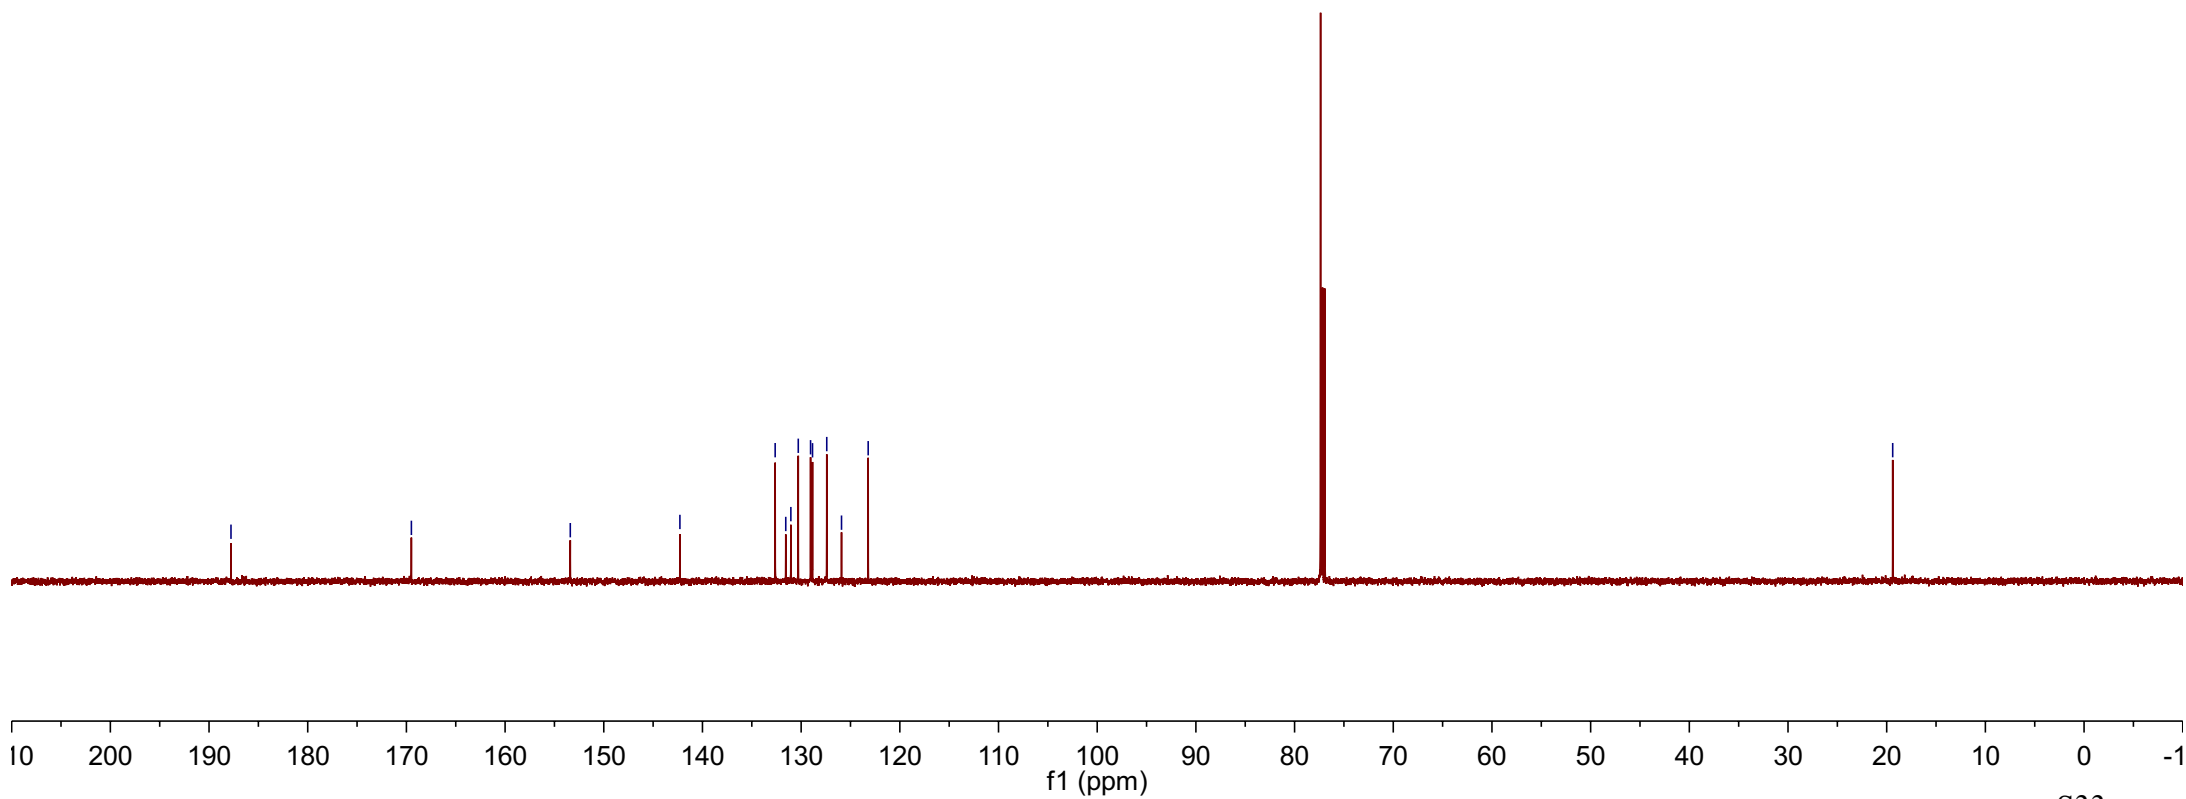

7.80  
7.79  
7.78  
7.77  
7.76  
7.35  
7.34  
7.33  
7.31  
7.26

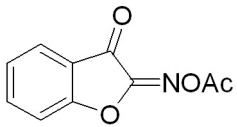

11

| Parameter              | Value |
|------------------------|-------|
| Solvent                | CDCl3 |
| Spectrometer Frequency | 600   |

2.33

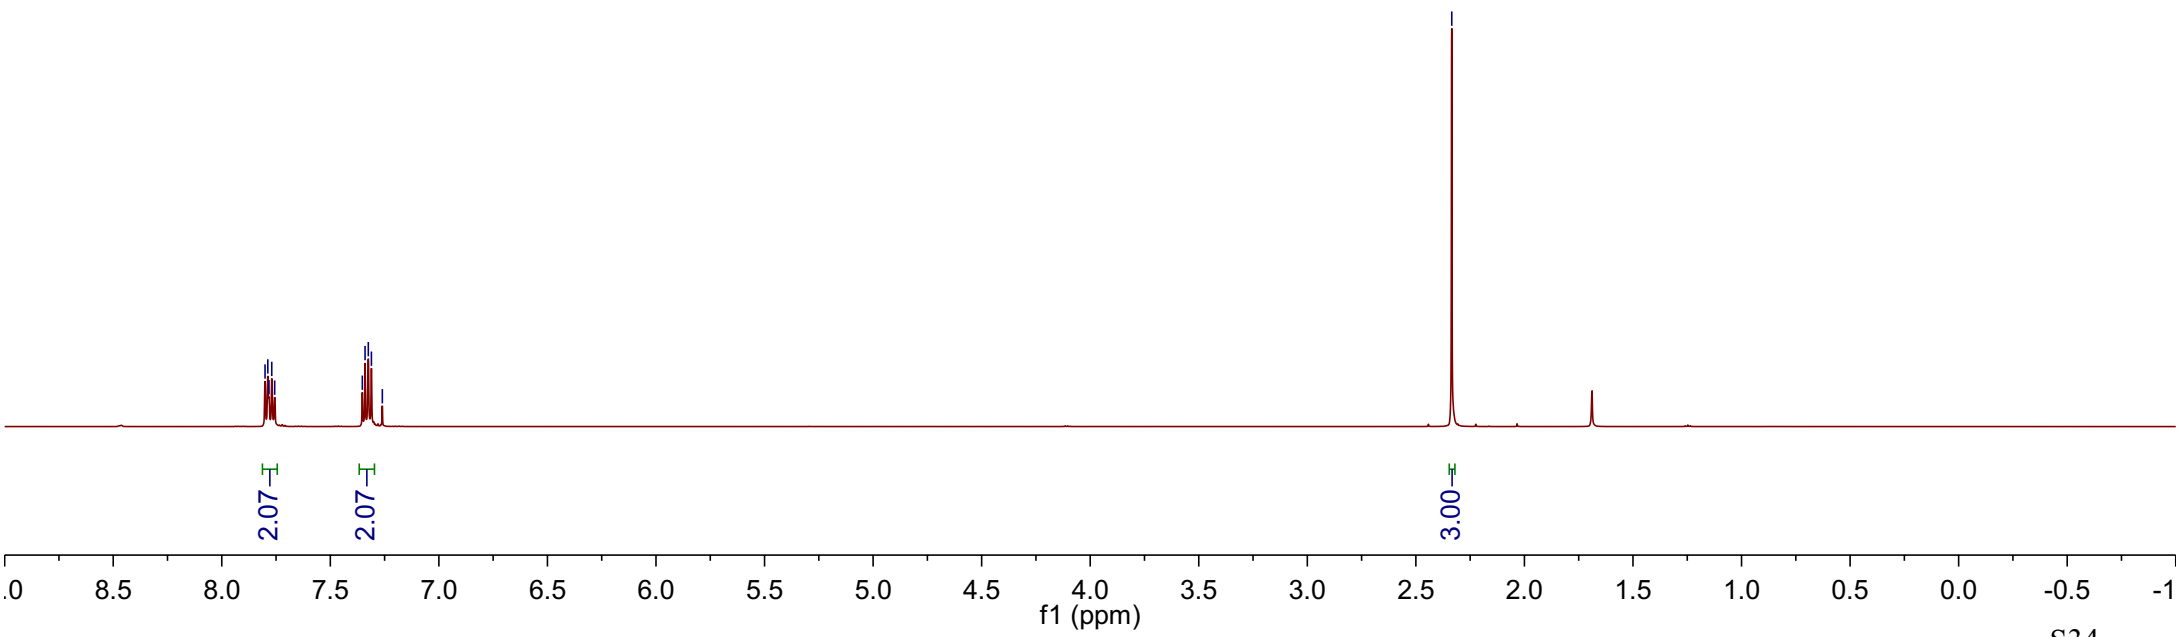

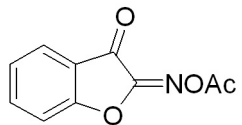

11

—179.71    ~167.73 ~165.30    —149.17    —139.89    {126.00 125.87 ~120.96    —113.60    —19.01

| Parameter              | Value |
|------------------------|-------|
| Solvent                | CDCl3 |
| Spectrometer Frequency | 150   |

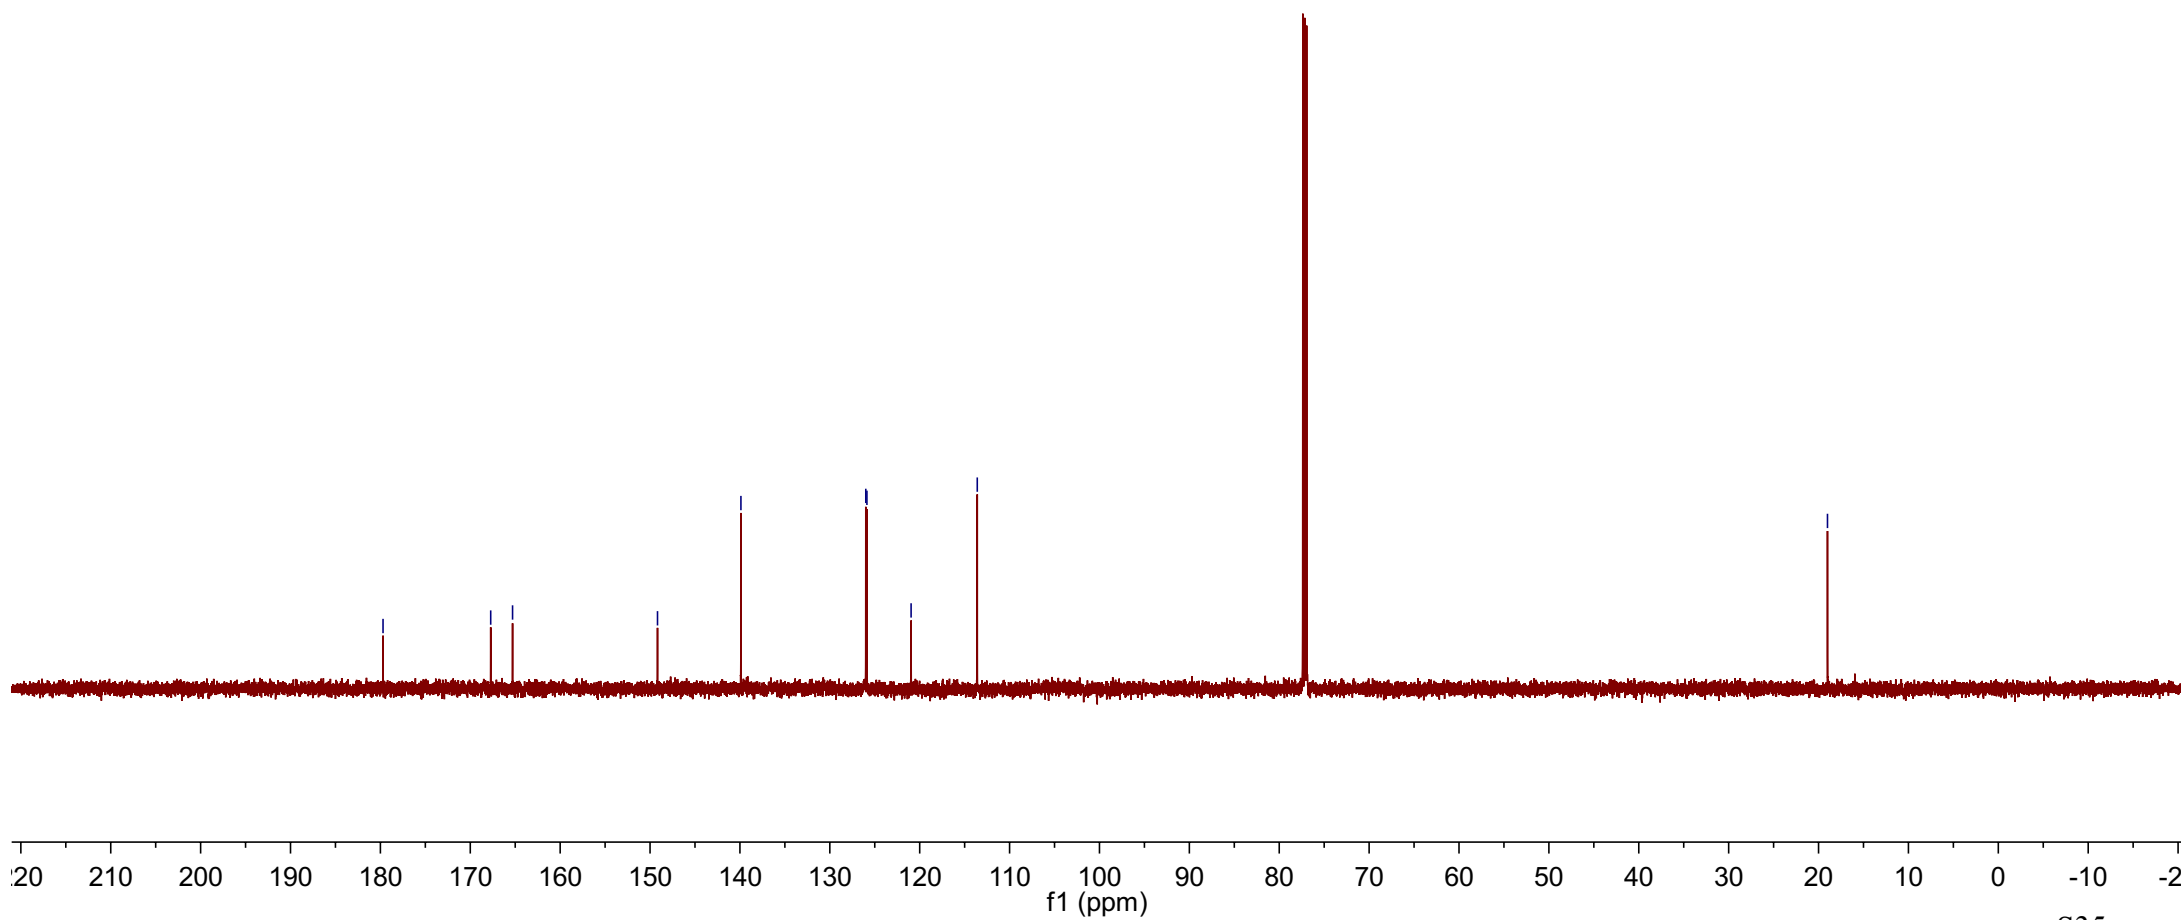

8.13  
8.11  
7.64  
7.62  
7.61  
7.60  
7.53  
7.52  
7.51  
7.51  
7.50  
7.50  
7.45  
7.26

4.04

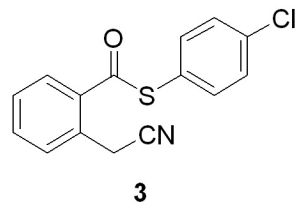

| Parameter              | Value |
|------------------------|-------|
| Solvent                | CDCl3 |
| Spectrometer Frequency | 600   |

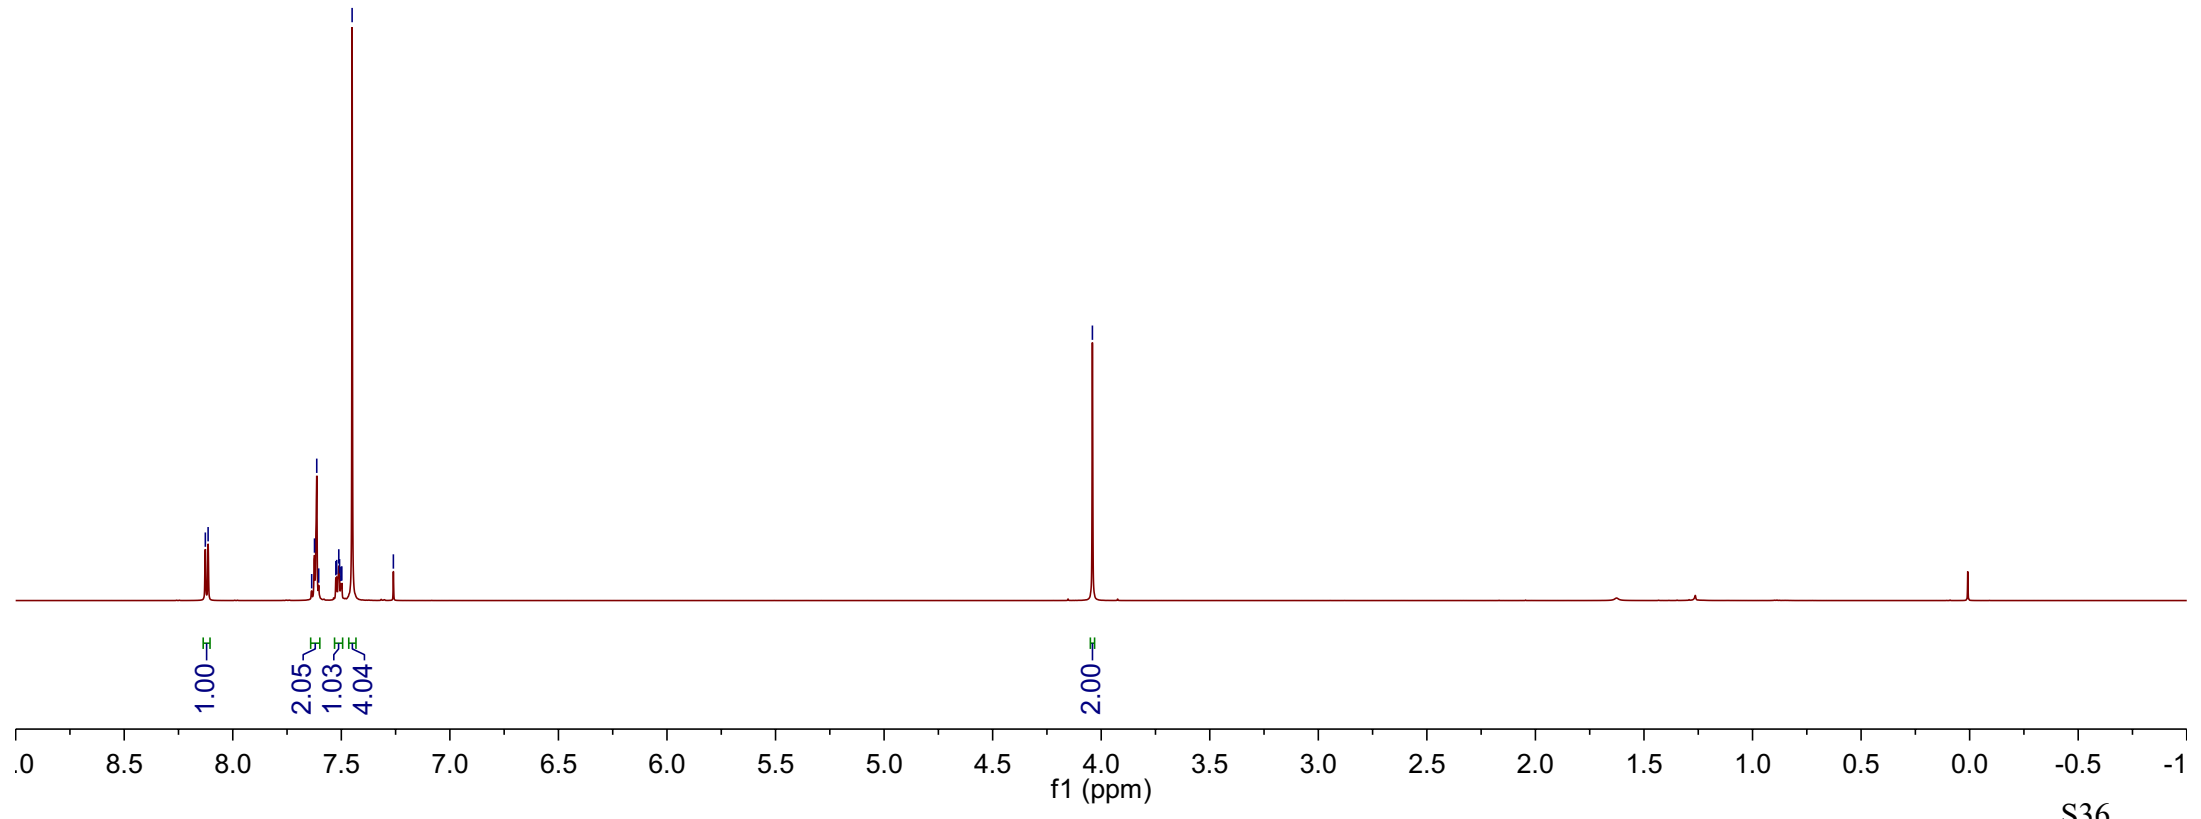

—192.22

136.83  
136.71  
135.33  
133.90  
130.84  
130.12  
130.09  
129.81  
129.04  
125.96  
—117.70

—22.32

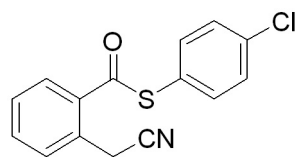

**3**

| Parameter              | Value |
|------------------------|-------|
| Solvent                | CDCl3 |
| Spectrometer Frequency | 150   |

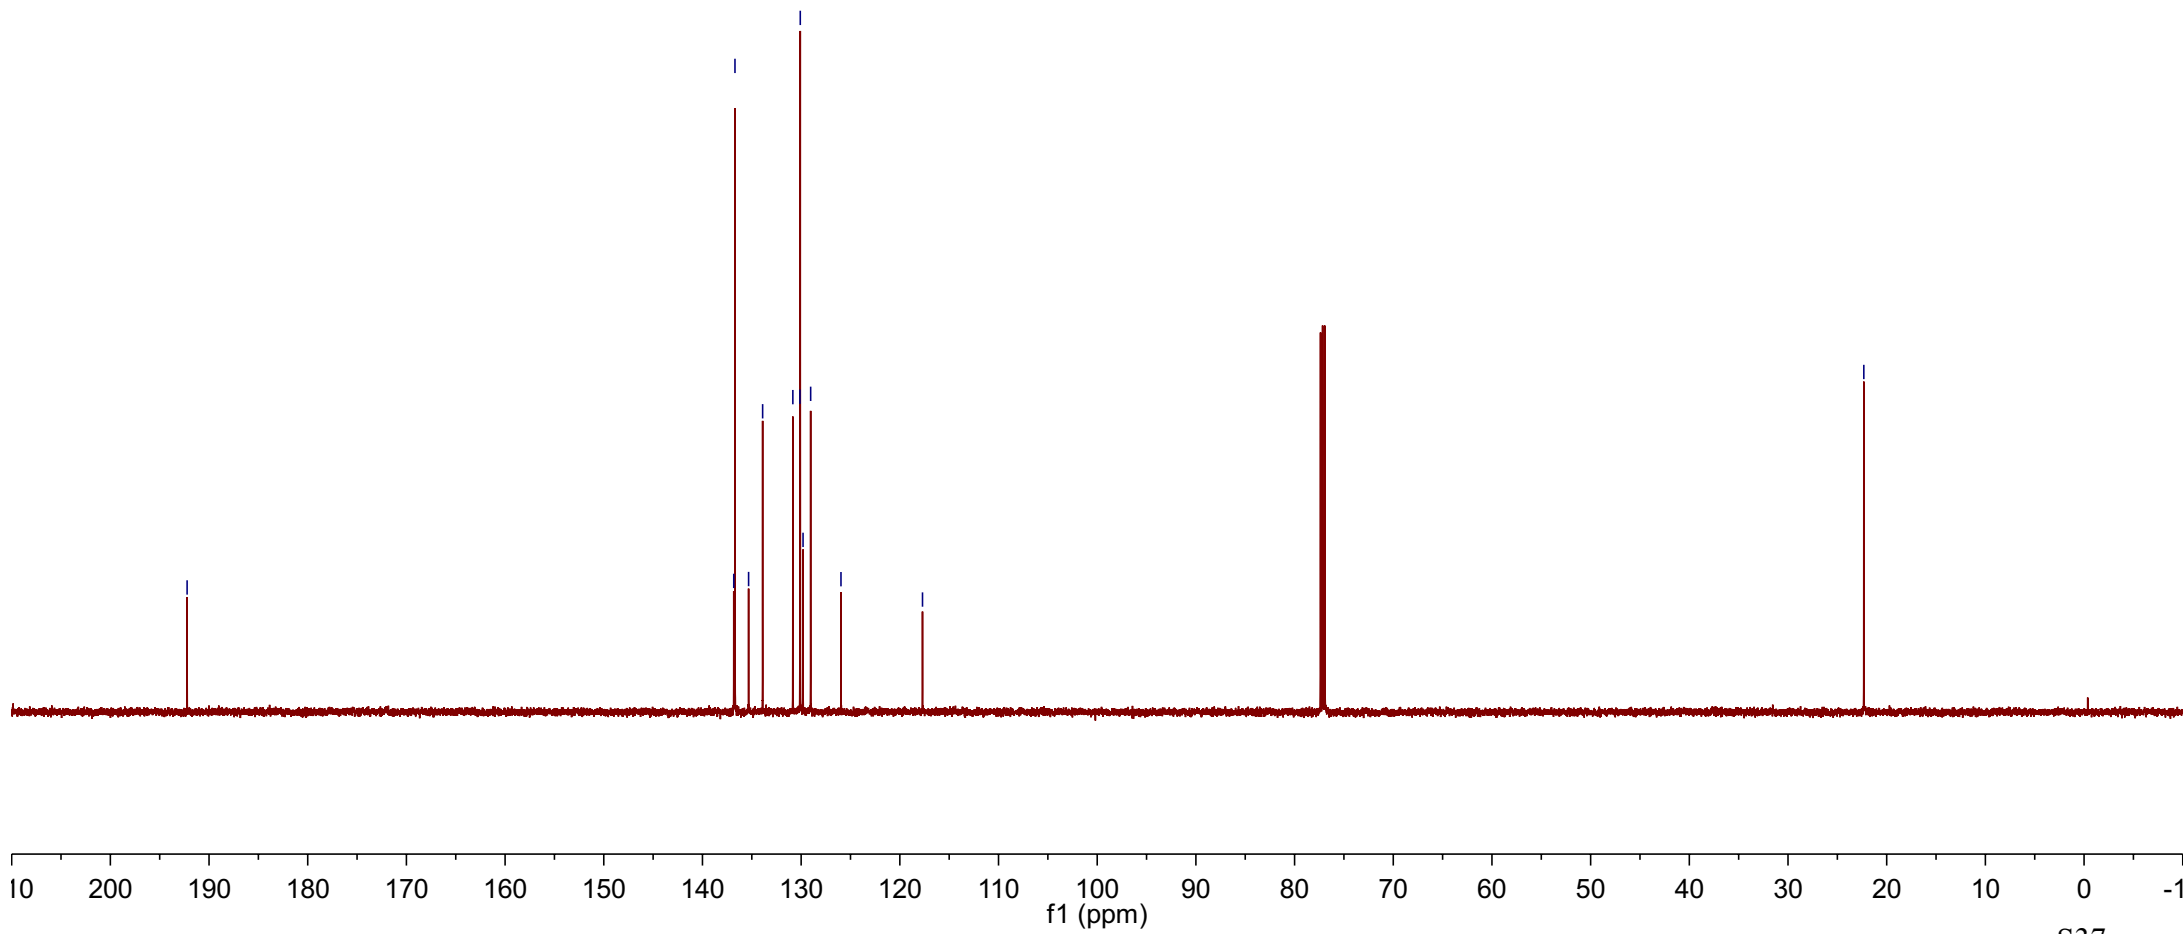

8.15  
8.14  
7.63  
7.62  
7.62  
7.61  
7.60  
7.52  
7.51  
7.50  
7.49  
7.49  
7.41  
7.40  
7.31  
7.29  
7.26

4.06

2.42

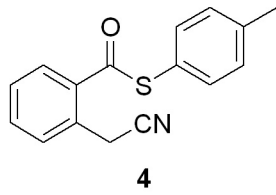

| Parameter              | Value             |
|------------------------|-------------------|
| Solvent                | CDCl <sub>3</sub> |
| Spectrometer Frequency | 600               |

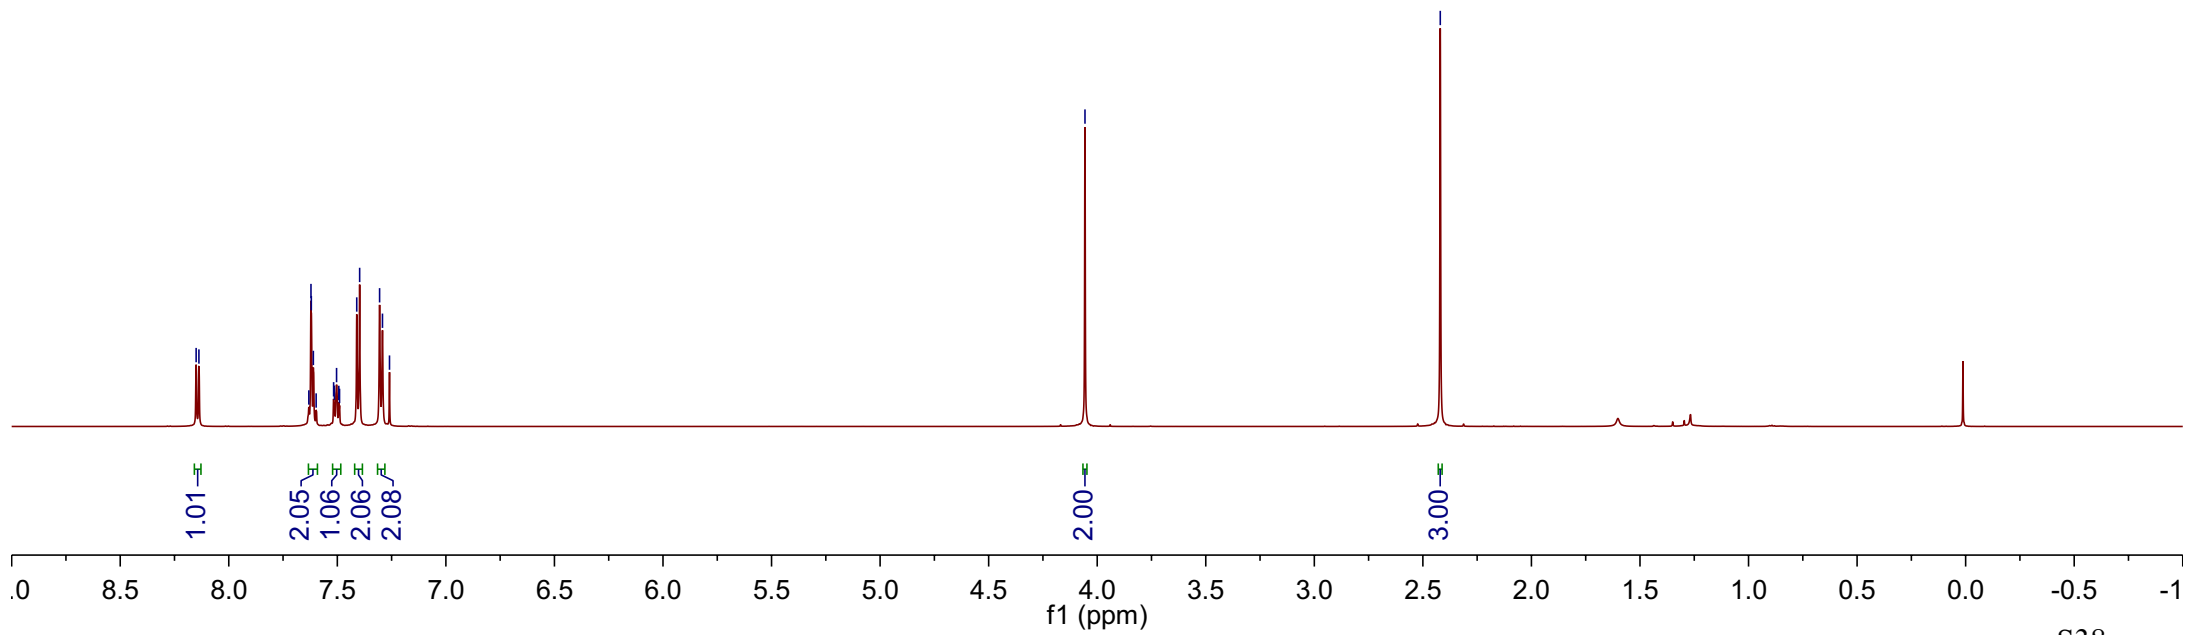

—193.31

140.77  
135.69  
135.41  
133.64  
130.71  
130.65  
130.13  
129.67  
128.93  
123.95  
117.85

22.27  
21.18

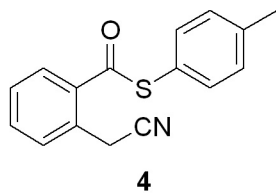

| Parameter              | Value             |
|------------------------|-------------------|
| Solvent                | CDCl <sub>3</sub> |
| Spectrometer Frequency | 150               |

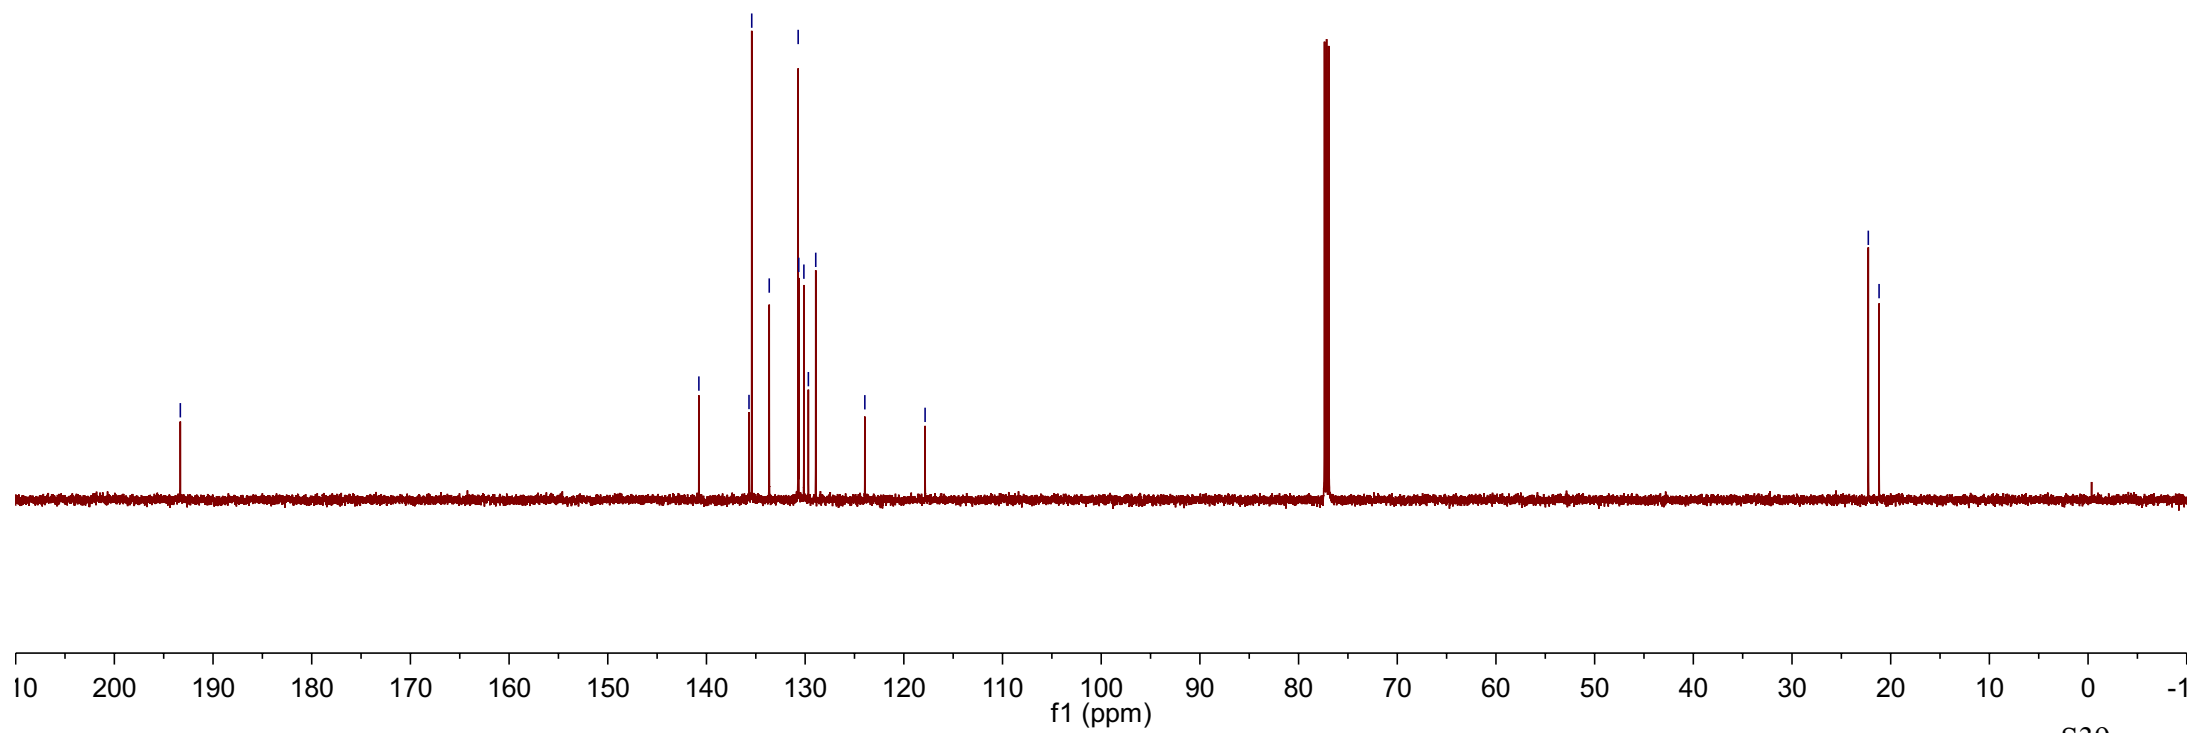

8.16  
8.14  
7.64  
7.62  
7.61  
7.61  
7.60  
7.60  
7.52  
7.51  
7.50  
7.49  
7.49  
7.45  
7.44  
7.44  
7.36  
7.35  
7.26

4.07

1.30  
1.29

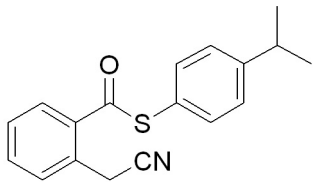

5

| Parameter              | Value |
|------------------------|-------|
| Solvent                | CDCl3 |
| Spectrometer Frequency | 600   |

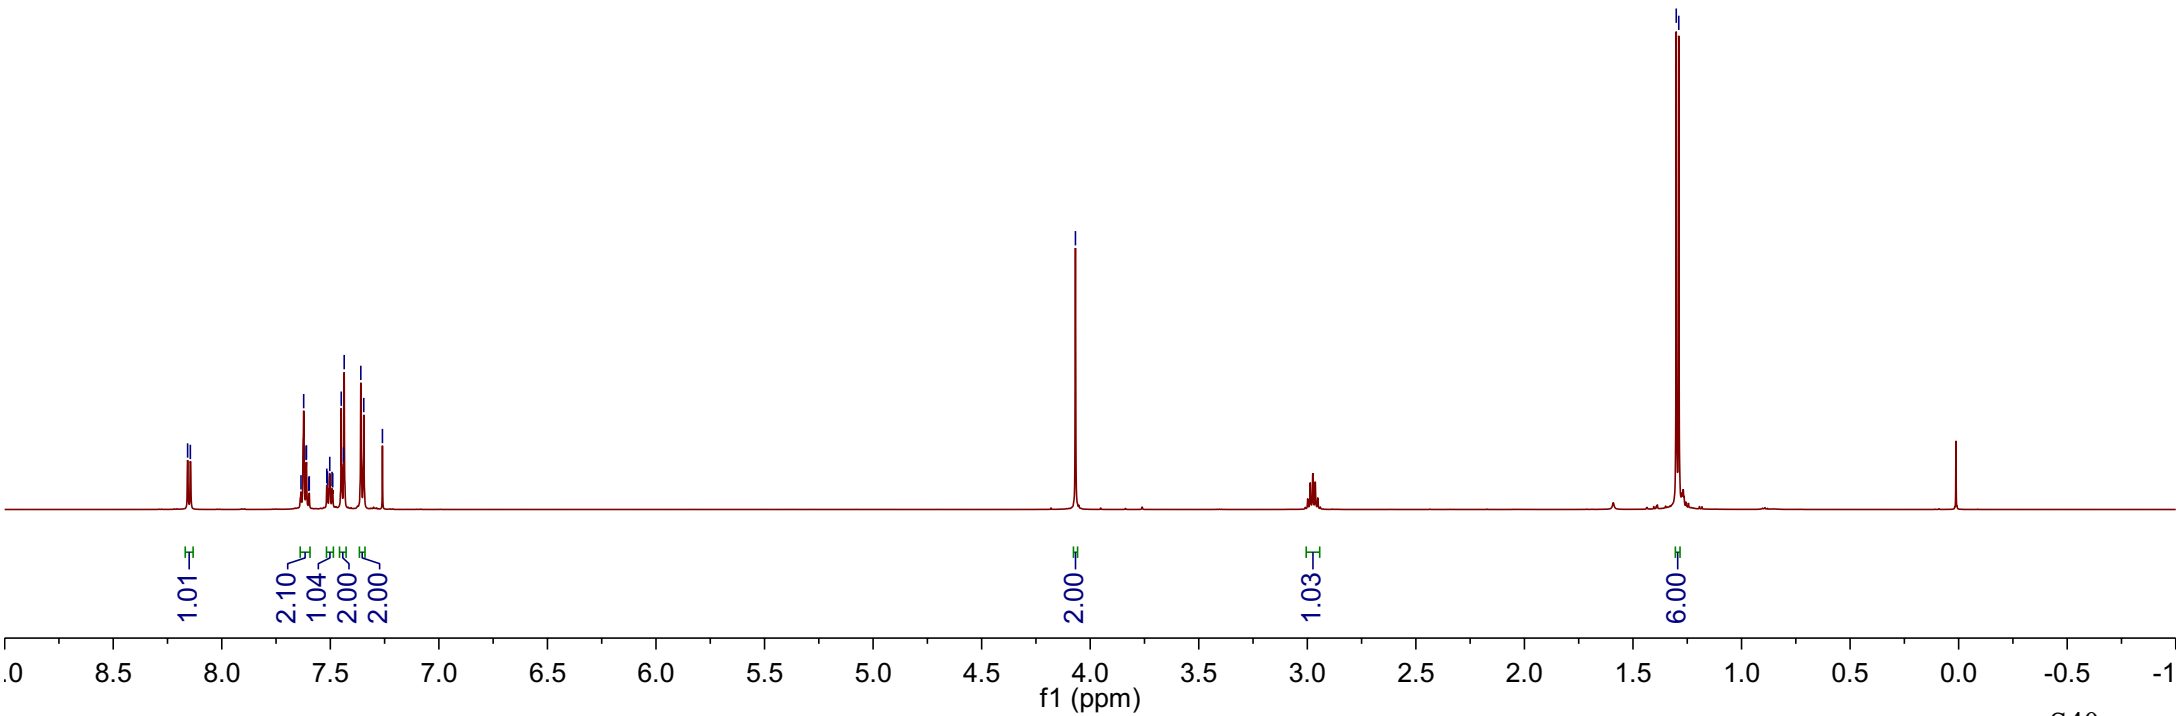



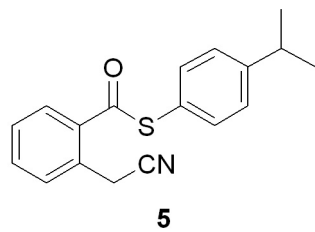

| Parameter              | Value             |
|------------------------|-------------------|
| Solvent                | CDCl <sub>3</sub> |
| Spectrometer Frequency | 150               |

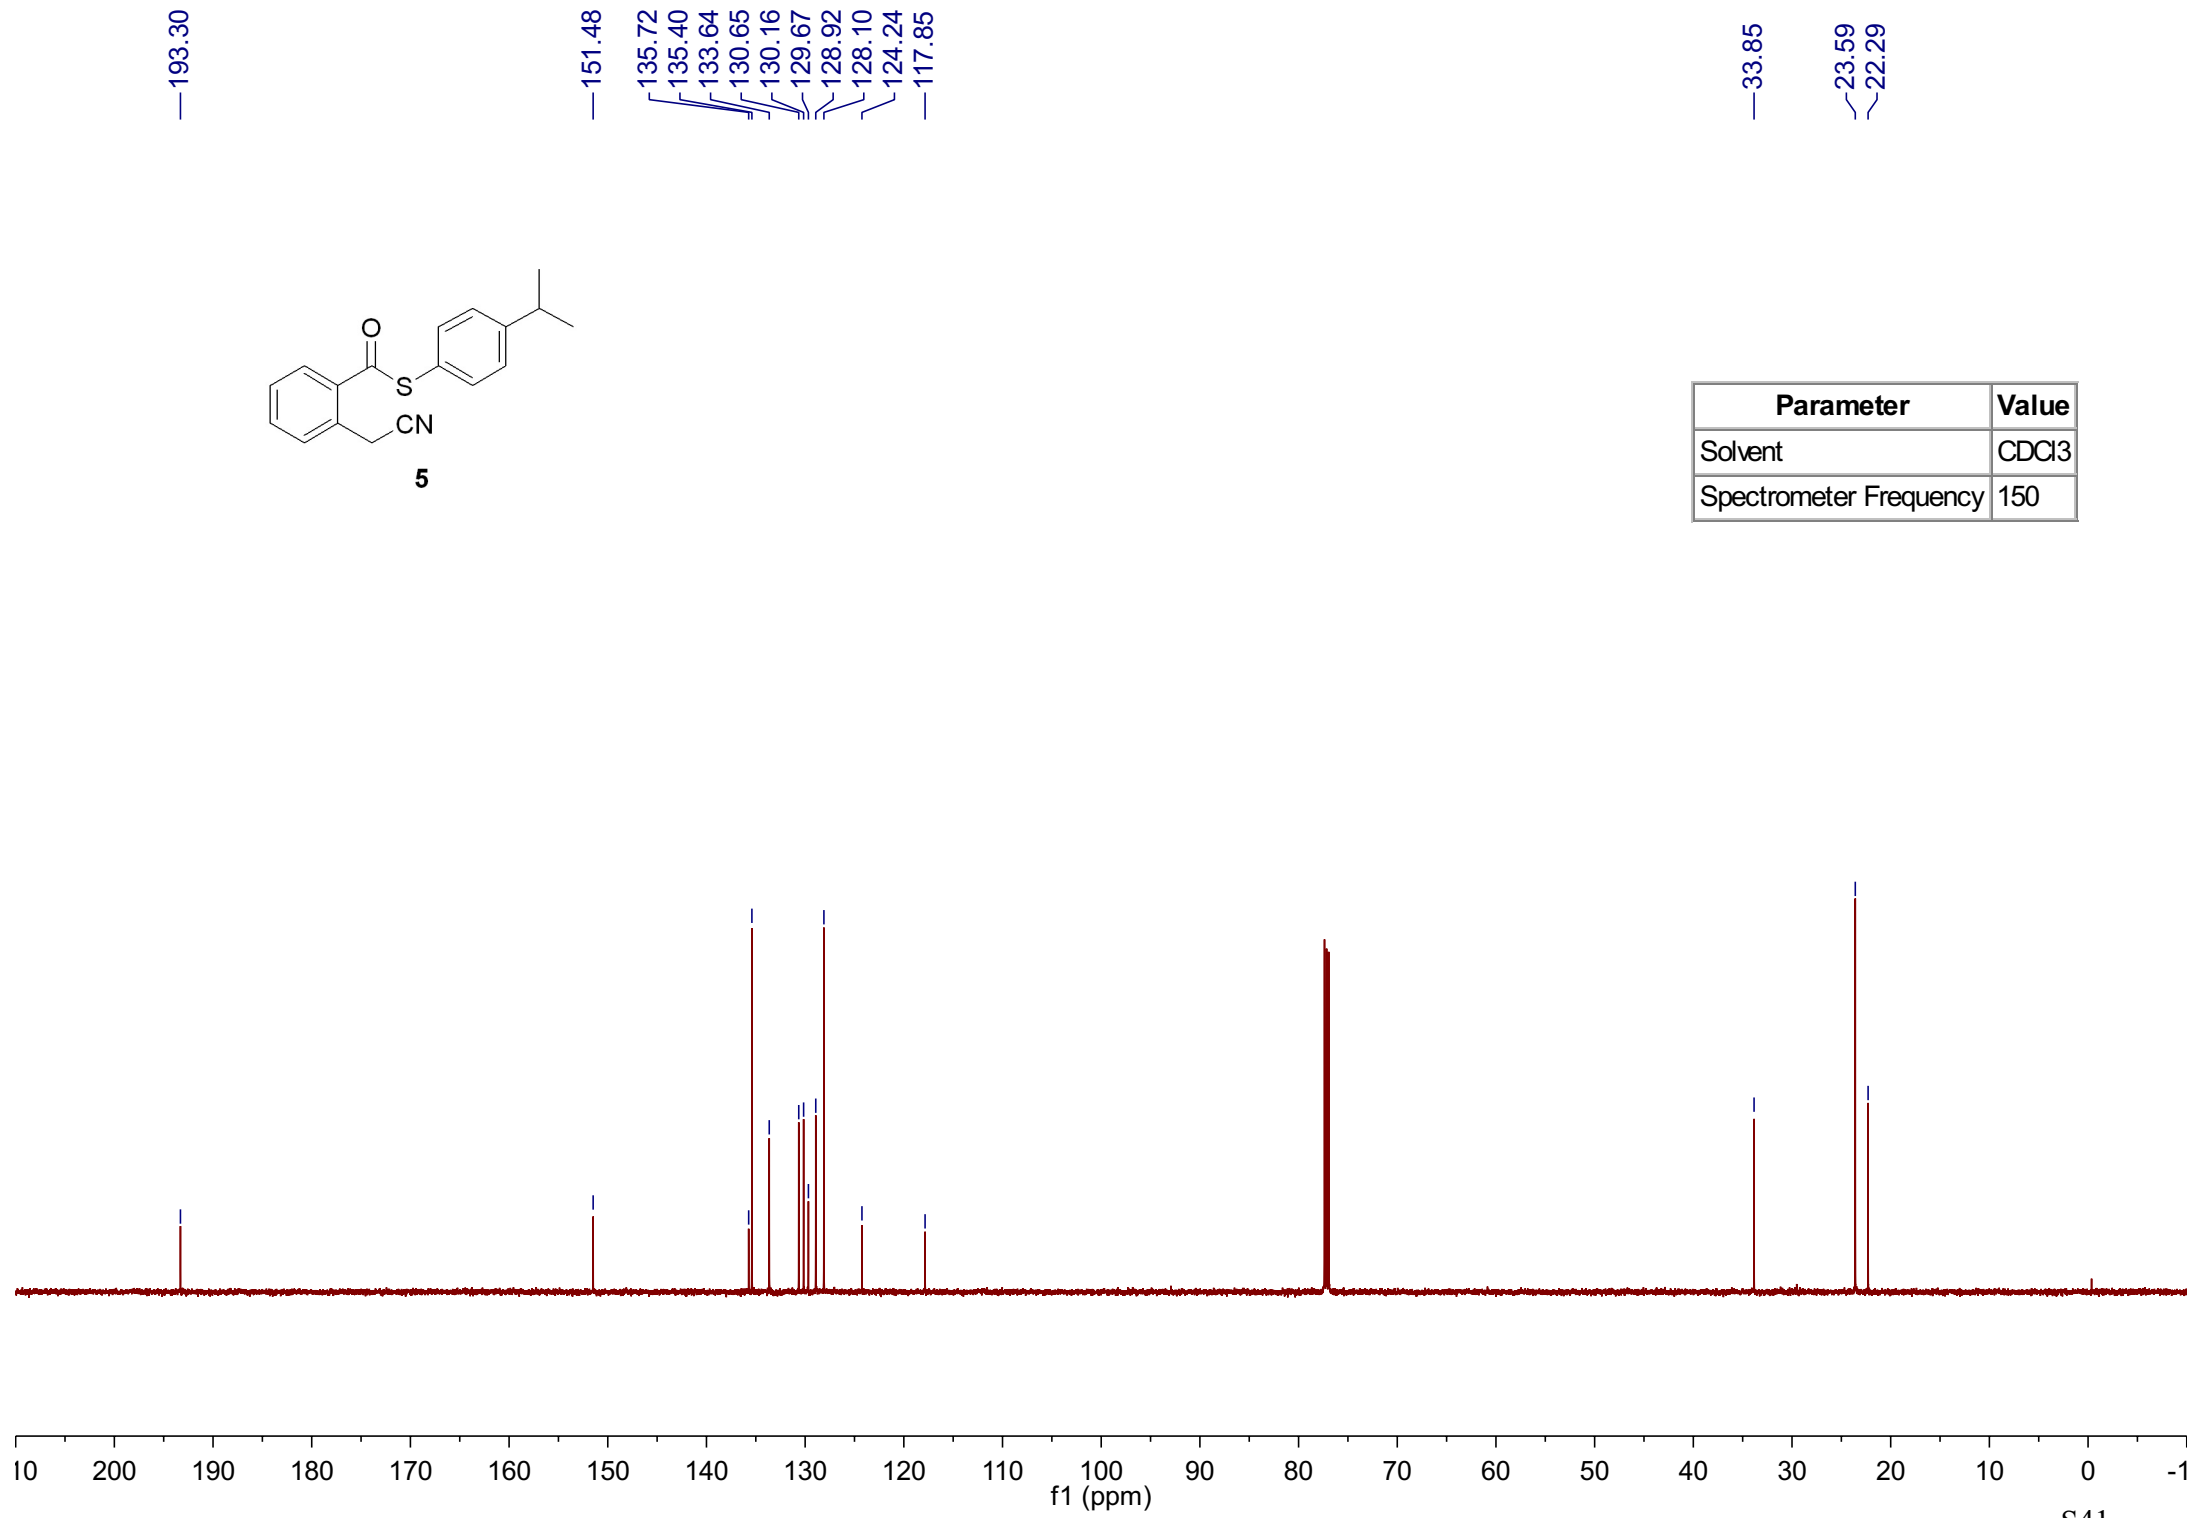

8.16  
8.15  
7.64  
7.62  
7.61  
7.61  
7.60  
7.60  
7.52  
7.50  
7.49  
7.49  
7.46  
7.44  
7.26

4.07

1.36

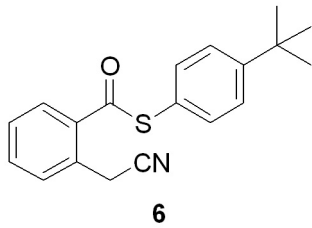

| Parameter              | Value             |
|------------------------|-------------------|
| Solvent                | CDCl <sub>3</sub> |
| Spectrometer Frequency | 600               |

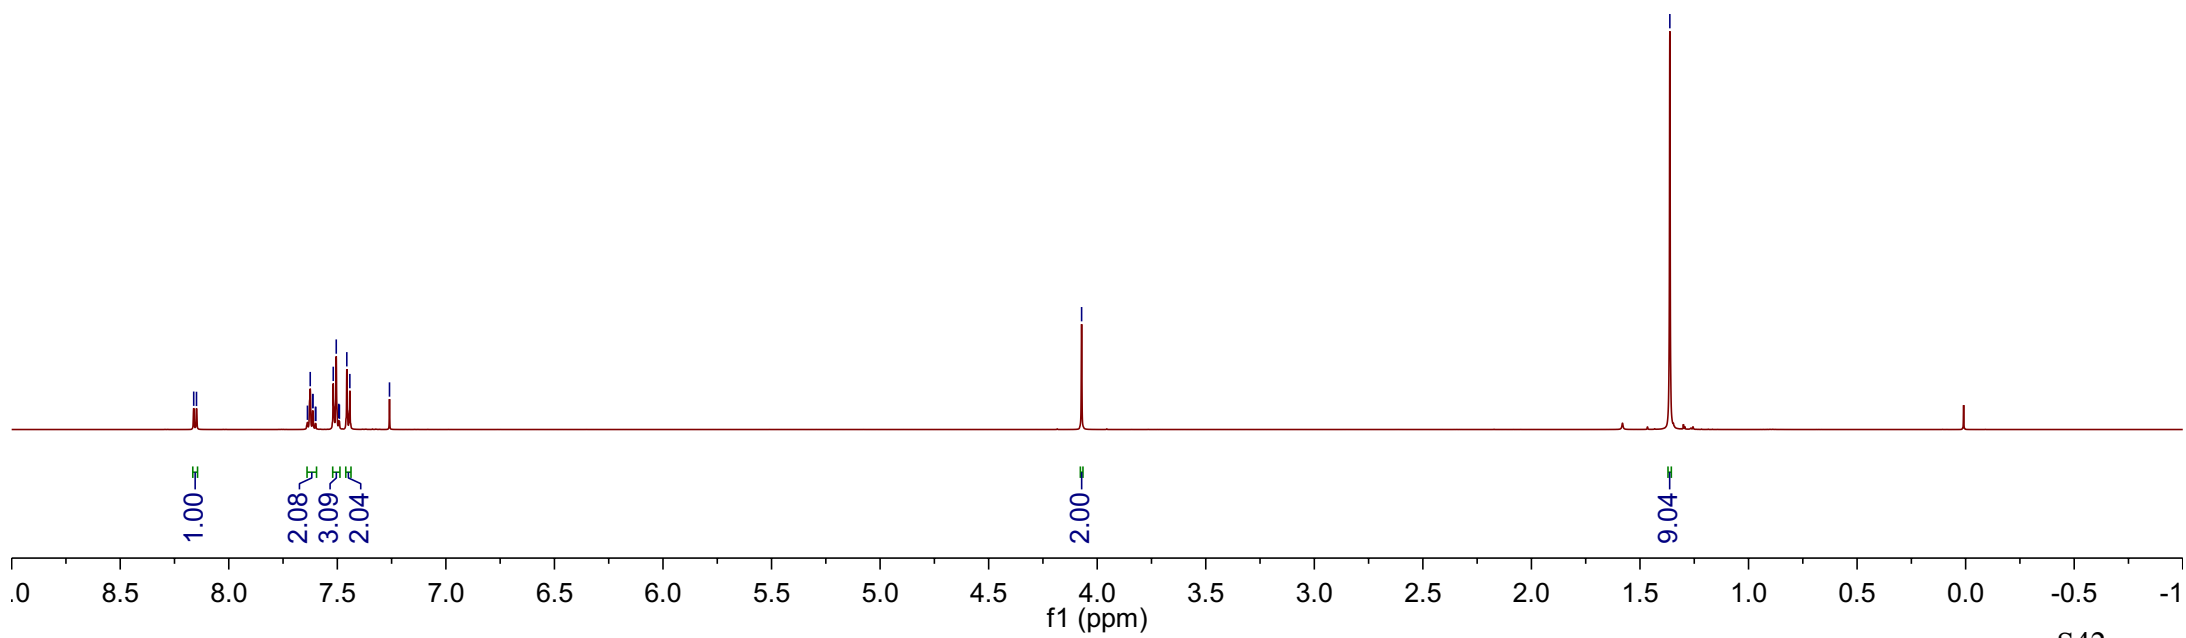

—193.30

—153.77

135.74  
135.08  
133.66  
130.66  
130.19  
129.68  
128.94  
127.01  
124.02  
117.86

—34.72

—31.06

—22.32

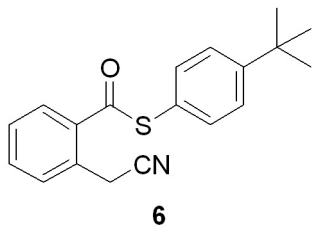

| Parameter              | Value             |
|------------------------|-------------------|
| Solvent                | CDCl <sub>3</sub> |
| Spectrometer Frequency | 150               |

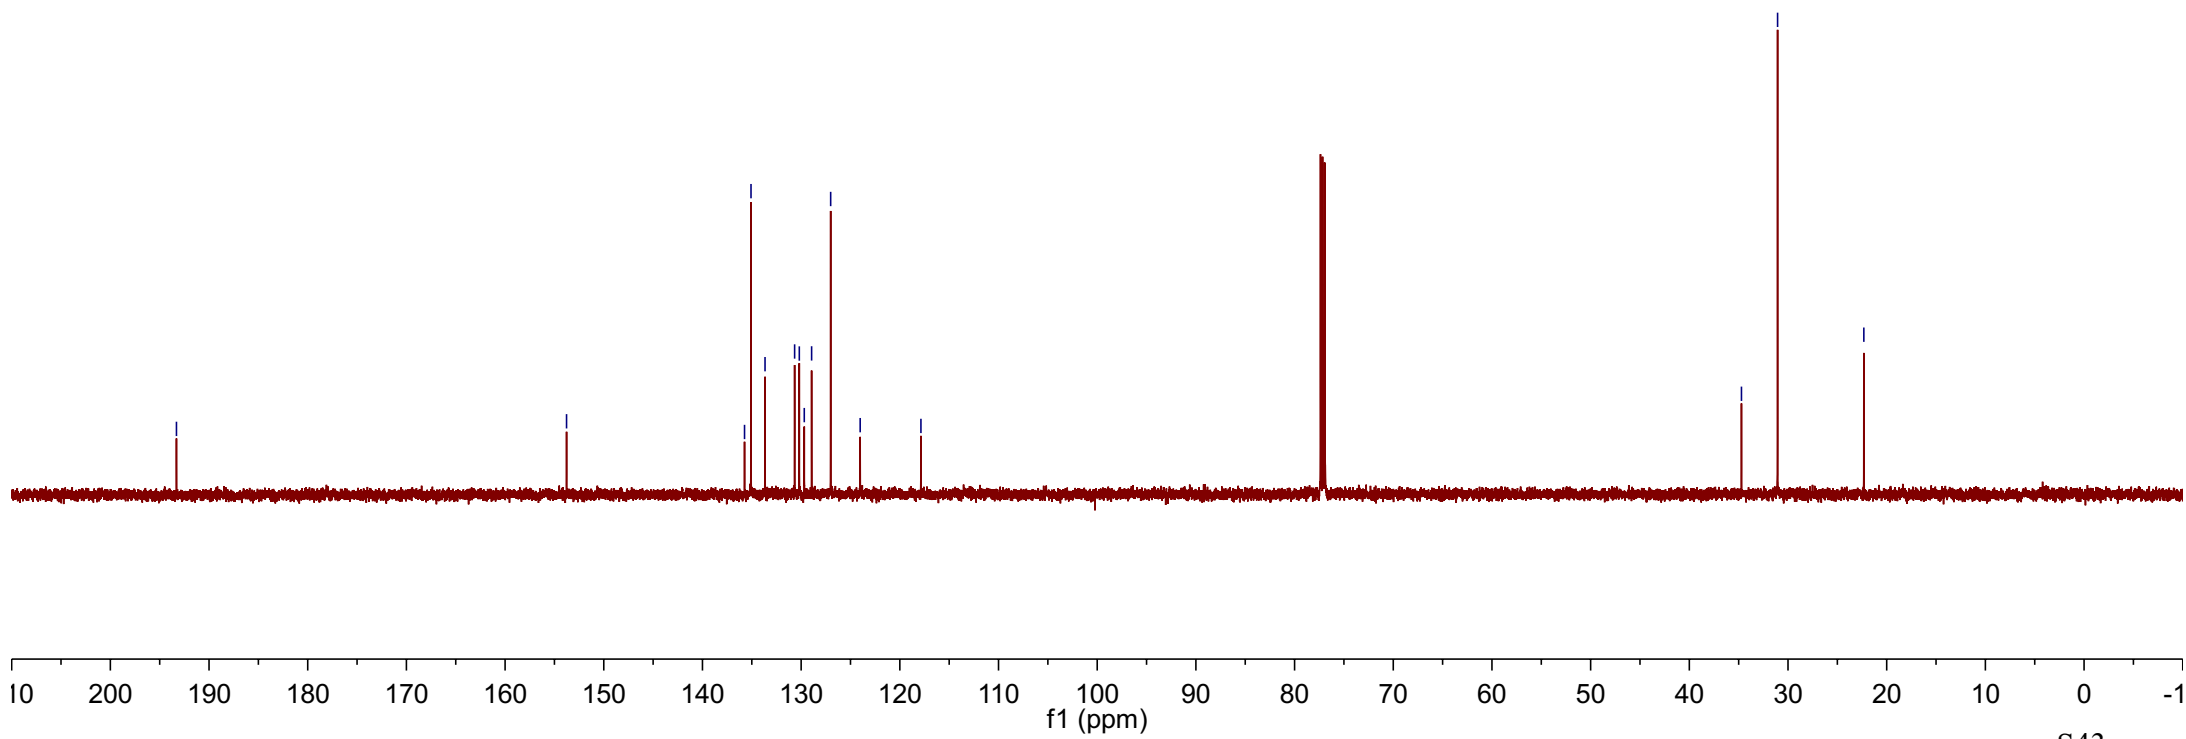

8.14  
8.13  
7.62  
7.61  
7.61  
7.60  
7.60  
7.59  
7.59  
7.51  
7.51  
7.50  
7.50  
7.49  
7.48  
7.44  
7.43  
7.43  
7.42  
7.42  
7.41  
7.26  
7.02  
7.01  
7.00  
7.00

4.05  
3.85

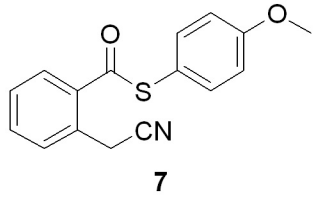

| Parameter              | Value             |
|------------------------|-------------------|
| Solvent                | CDCl <sub>3</sub> |
| Spectrometer Frequency | 600               |

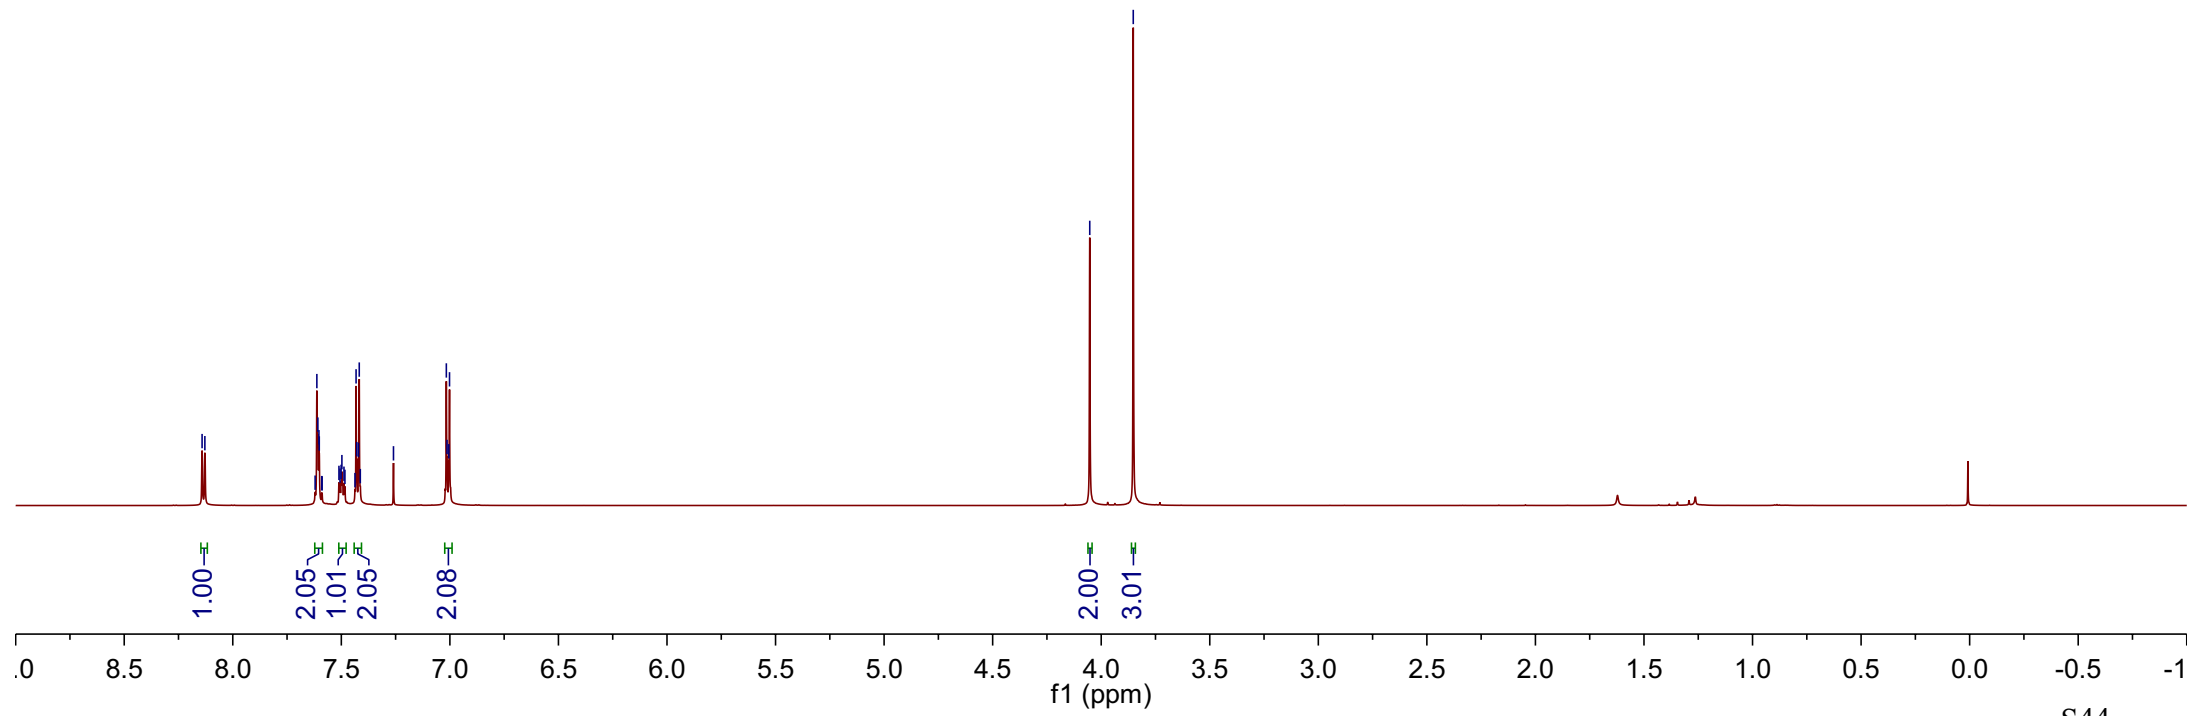

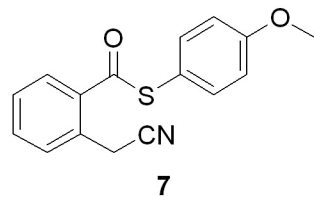

| Parameter              | Value             |
|------------------------|-------------------|
| Solvent                | CDCl <sub>3</sub> |
| Spectrometer Frequency | 150               |

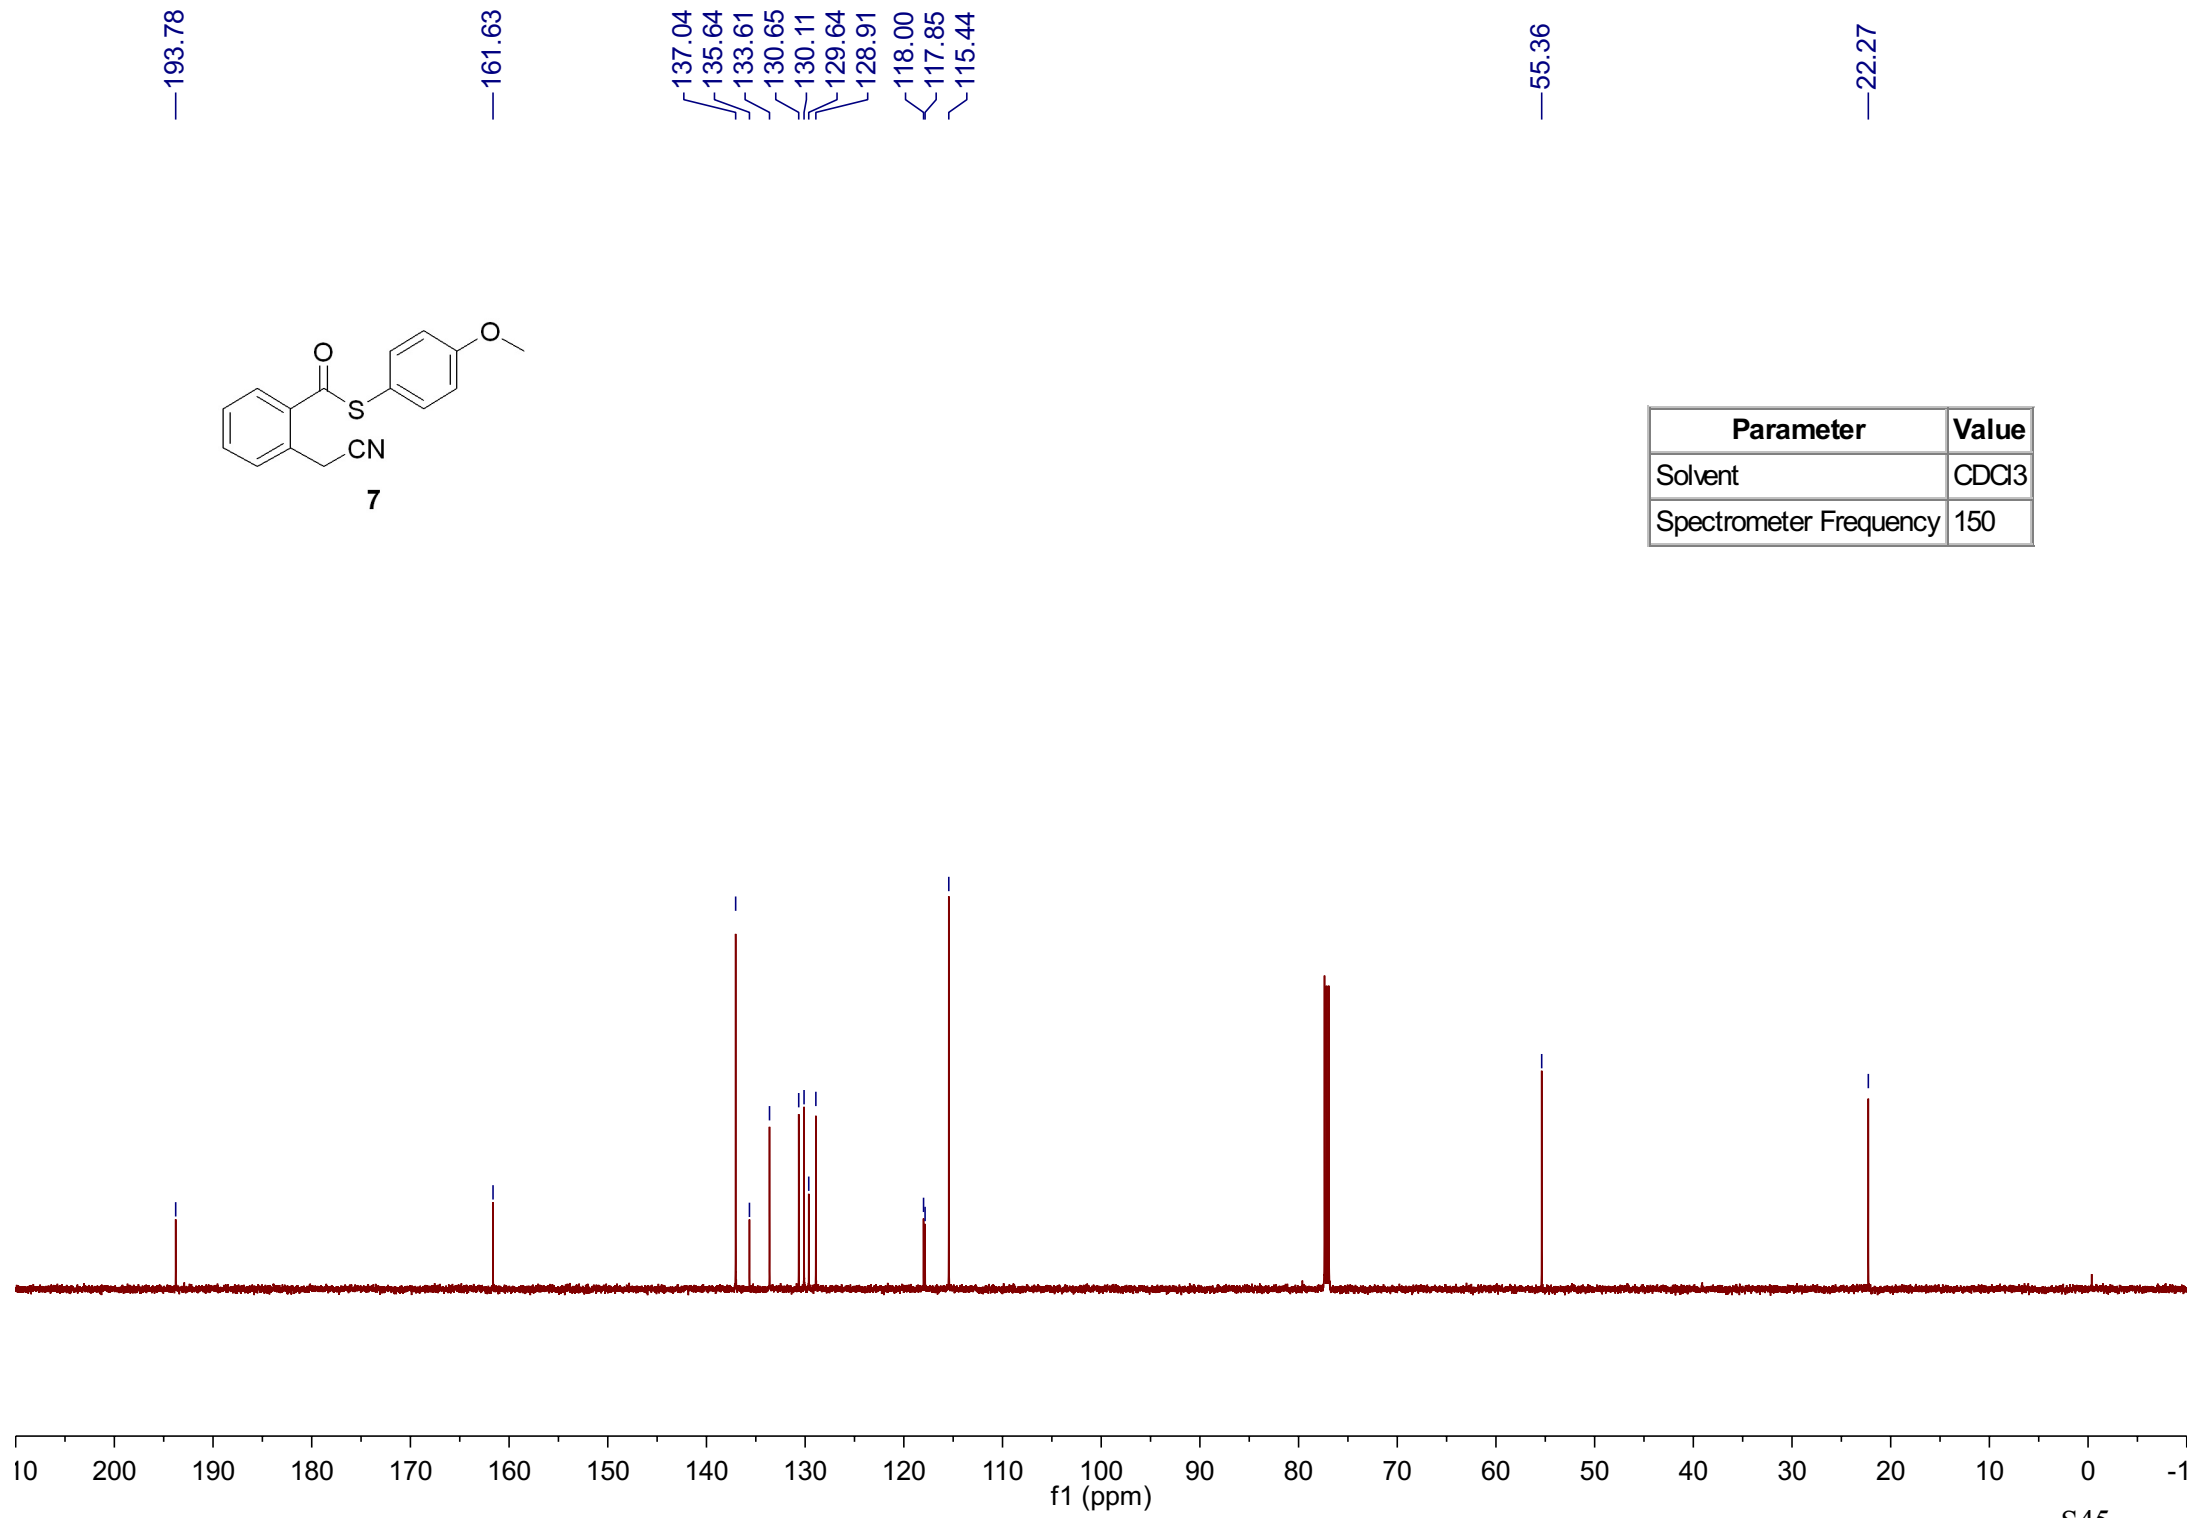

137.04  
135.64  
133.61  
130.65  
130.11  
129.64  
128.91  
118.00  
117.85  
115.44

193.78

161.63

55.36

22.27

—10.21

8.09  
8.07  
7.74  
7.72  
7.71  
7.70  
7.63  
7.62  
7.60  
7.59  
7.47  
7.46

—4.13

—2.50

—2.09

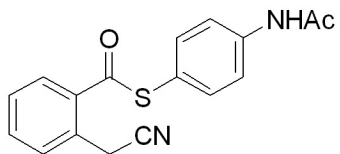

**8**

| Parameter              | Value |
|------------------------|-------|
| Solvent                | DMSO  |
| Spectrometer Frequency | 600   |

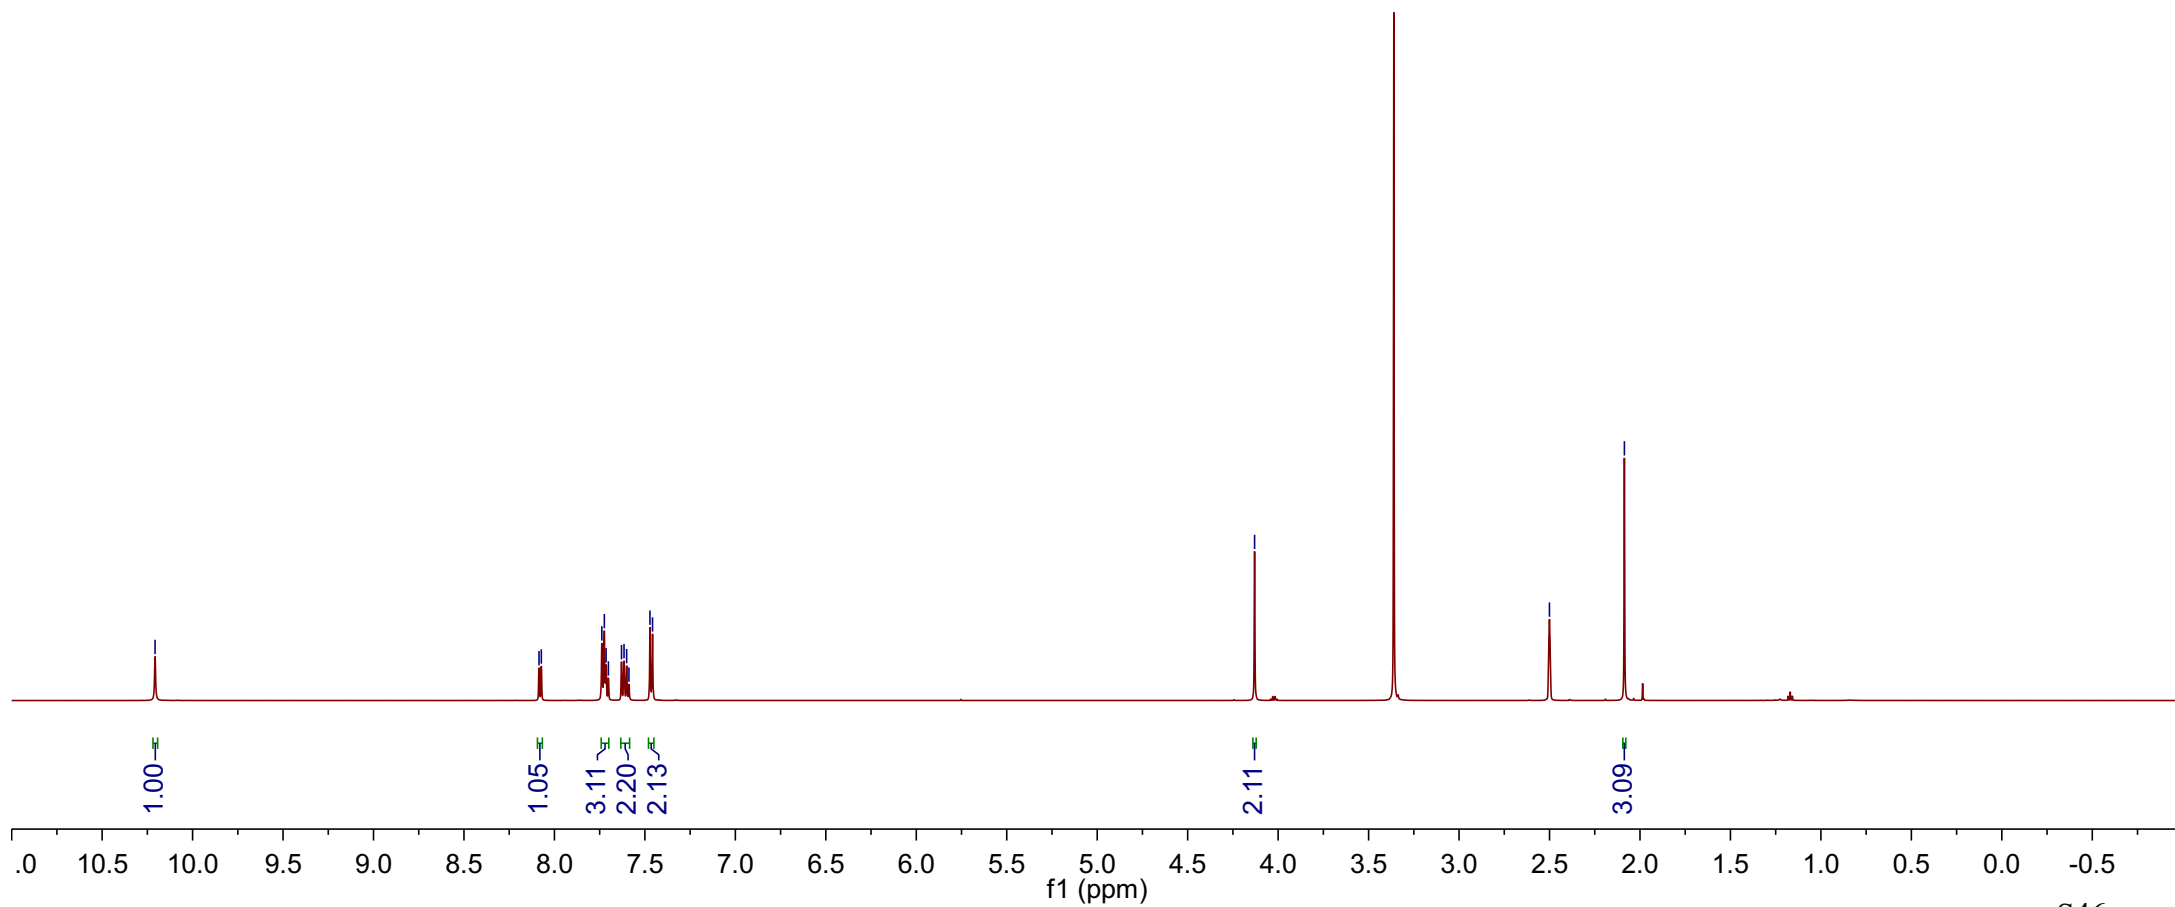

—192.43 —169.56

141.51 136.20 135.83 134.10 131.65 130.21 129.71 129.41 120.38 120.09 118.93

—24.05 —21.55

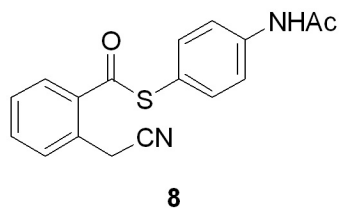

| Parameter              | Value |
|------------------------|-------|
| Solvent                | DMSO  |
| Spectrometer Frequency | 150   |

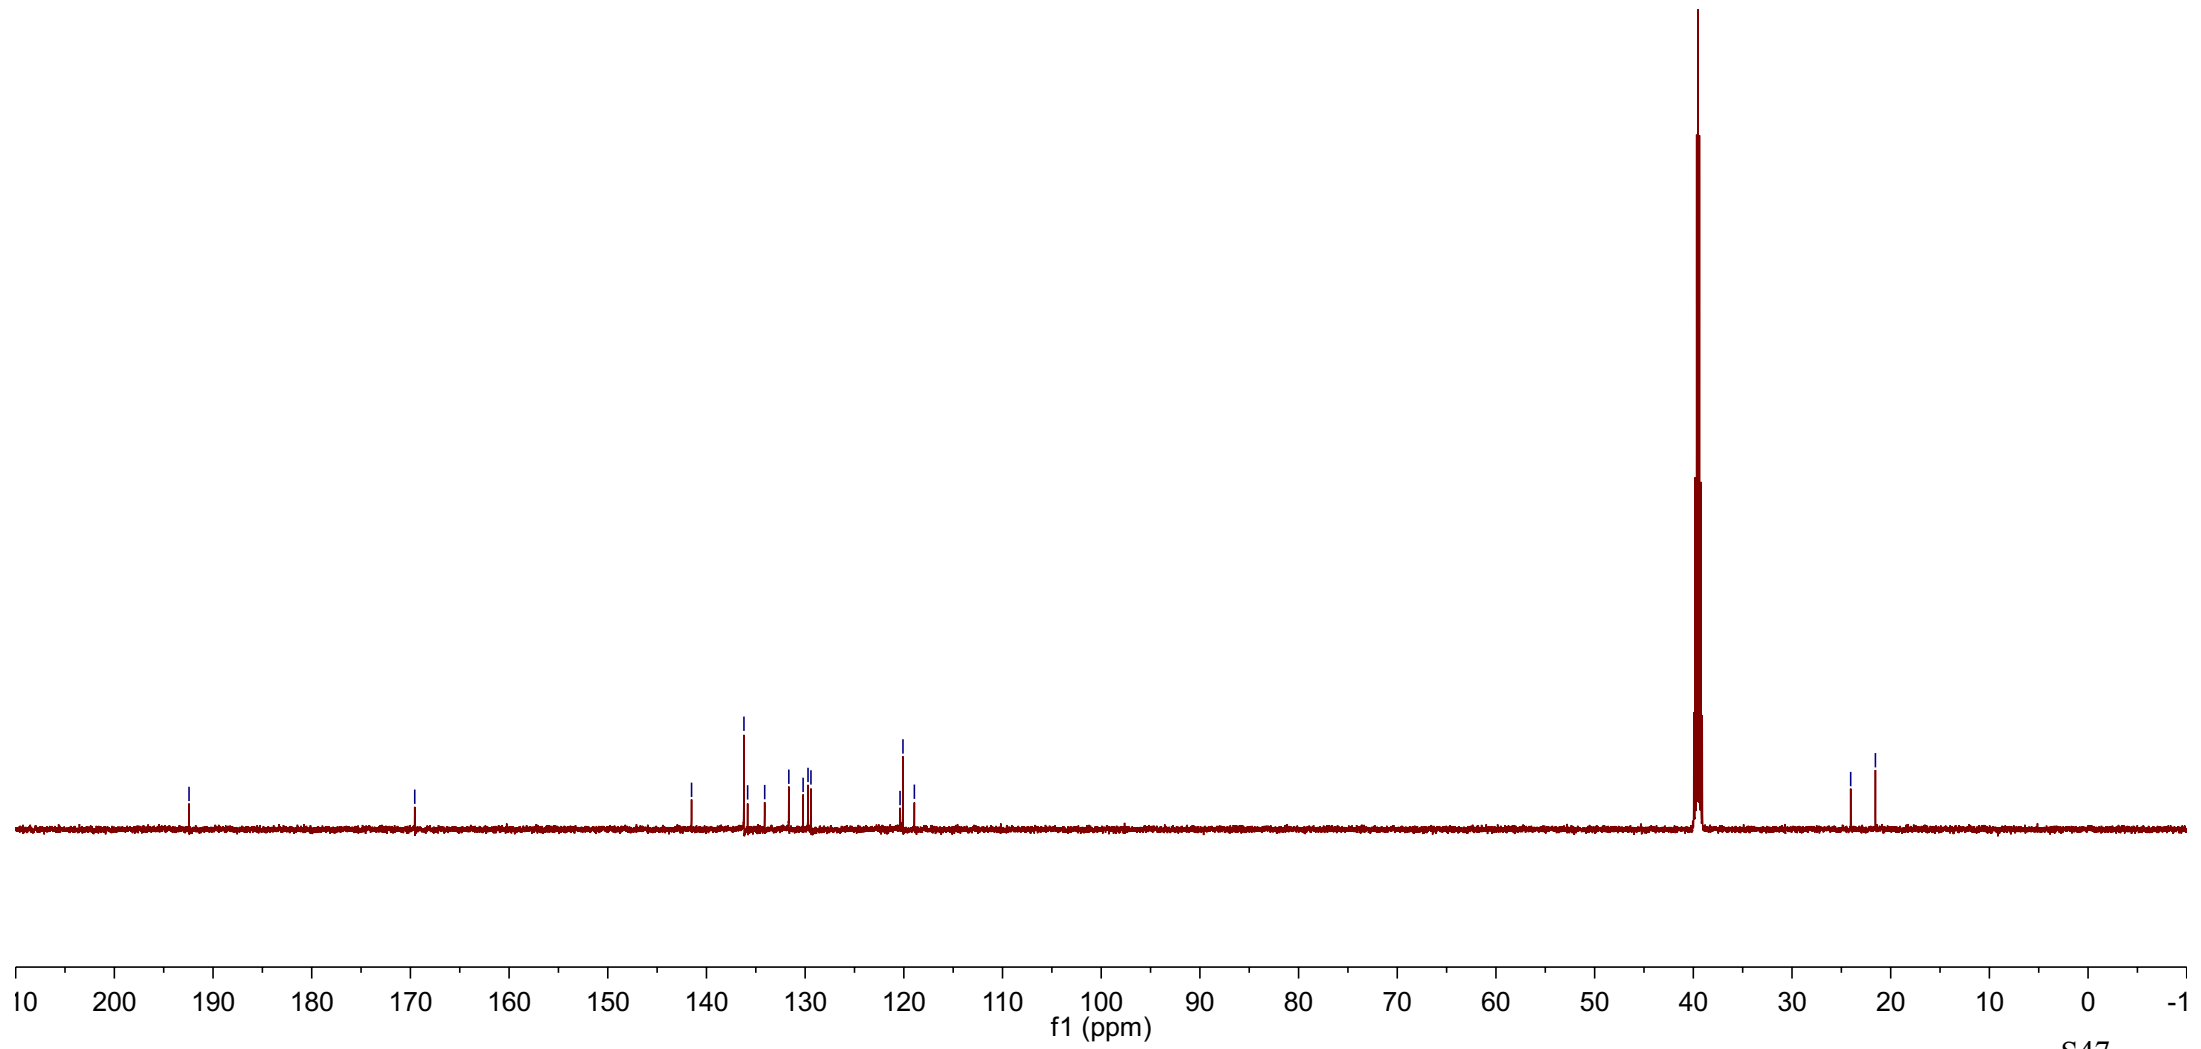

8.13  
8.12  
7.64  
7.62  
7.62  
7.61  
7.61  
7.53  
7.52  
7.51  
7.50  
7.50  
7.49  
7.49  
7.26  
7.19  
7.18  
7.17

4.05

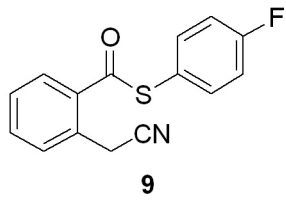

| Parameter              | Value |
|------------------------|-------|
| Solvent                | CDCl3 |
| Spectrometer Frequency | 600   |

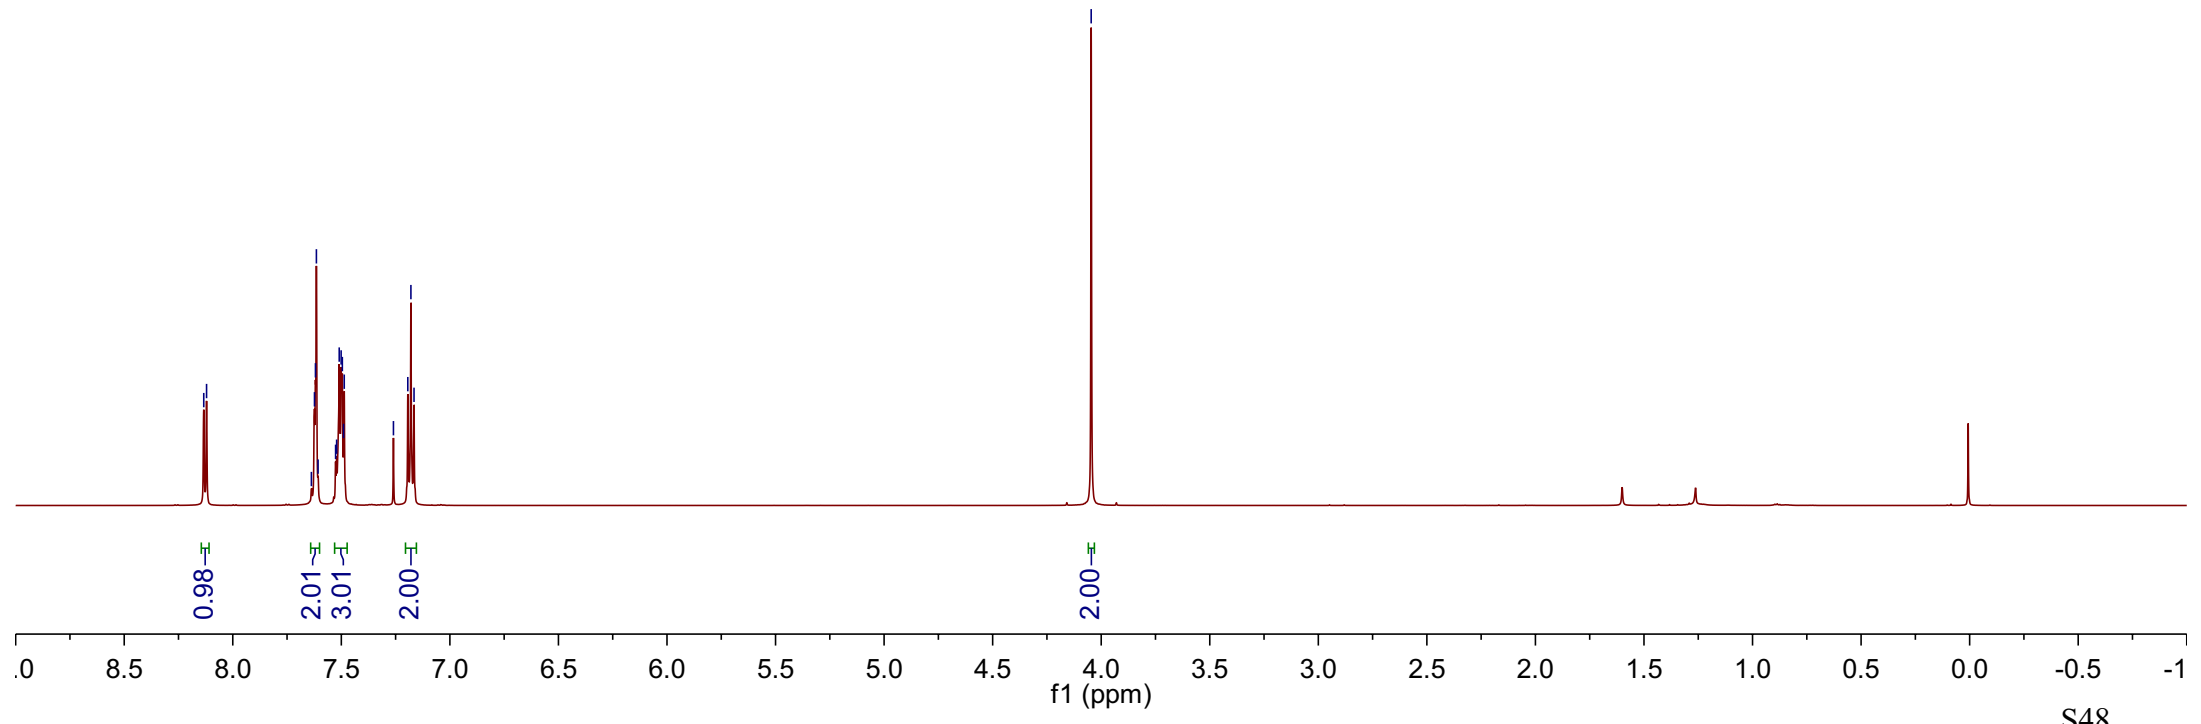



—192.75

165.24  
163.57

137.63  
137.58  
135.41  
133.85  
130.83  
130.14  
129.78  
129.03  
122.82  
122.80  
117.74  
117.16  
117.01

—22.33

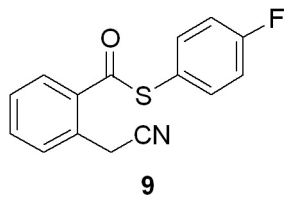

| Parameter              | Value             |
|------------------------|-------------------|
| Solvent                | CDCl <sub>3</sub> |
| Spectrometer Frequency | 150               |

A (d)  
164.41  
H

B (d)  
137.61  
I

D (d)  
122.81  
I

C (d)  
117.08  
H

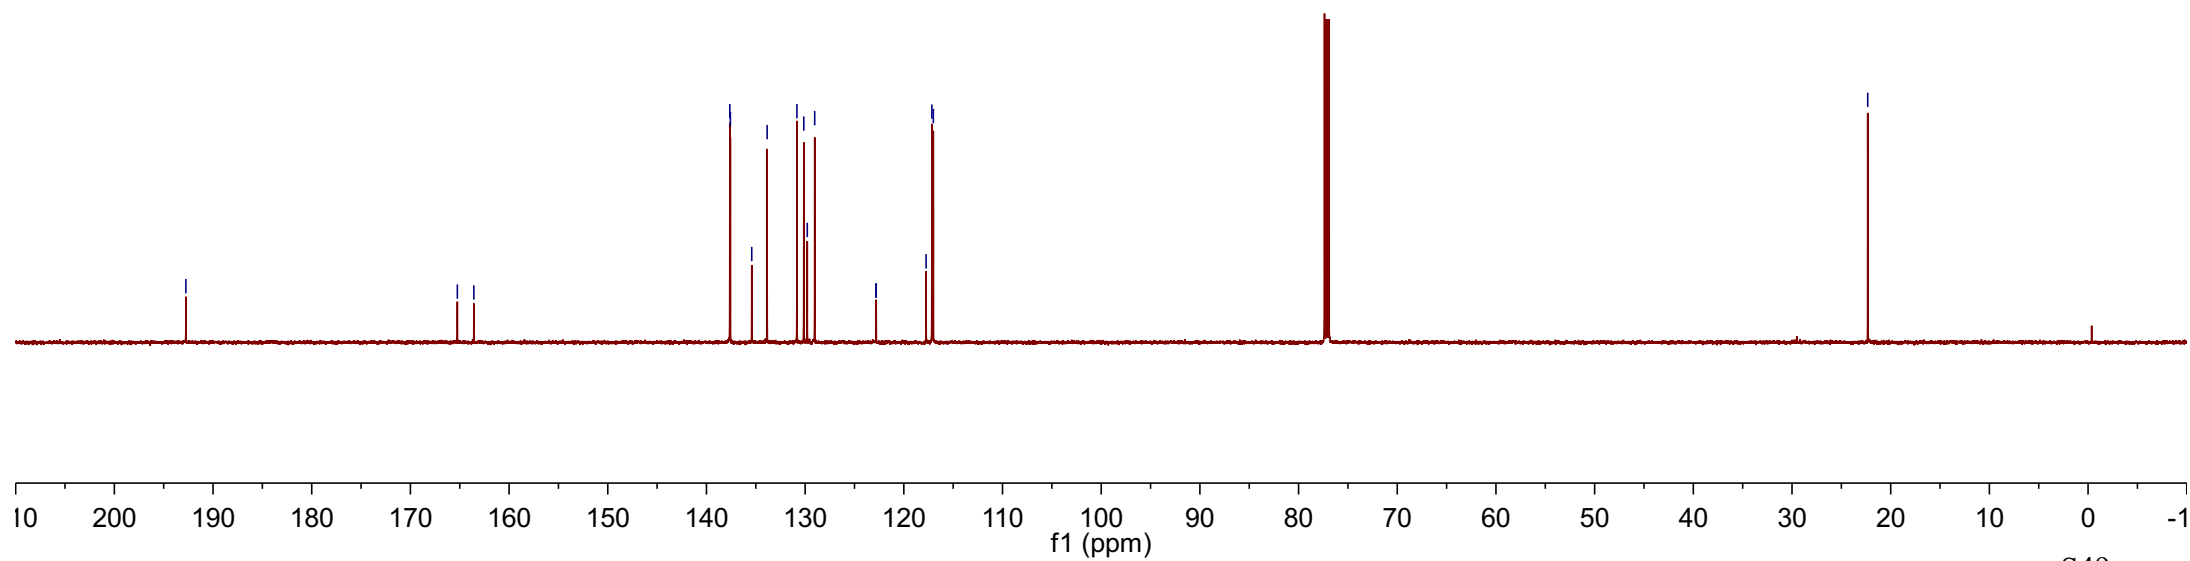

8.12  
8.11  
7.63  
7.62  
7.62  
7.61  
7.61  
7.61  
7.60  
7.60  
7.60  
7.53  
7.52  
7.51  
7.51  
7.51  
7.50  
7.50  
7.39  
7.39  
7.38  
7.38  
7.37  
7.37  
7.26

4.04

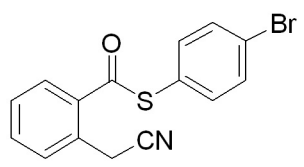

10

| Parameter              | Value |
|------------------------|-------|
| Solvent                | CDCl3 |
| Spectrometer Frequency | 600   |

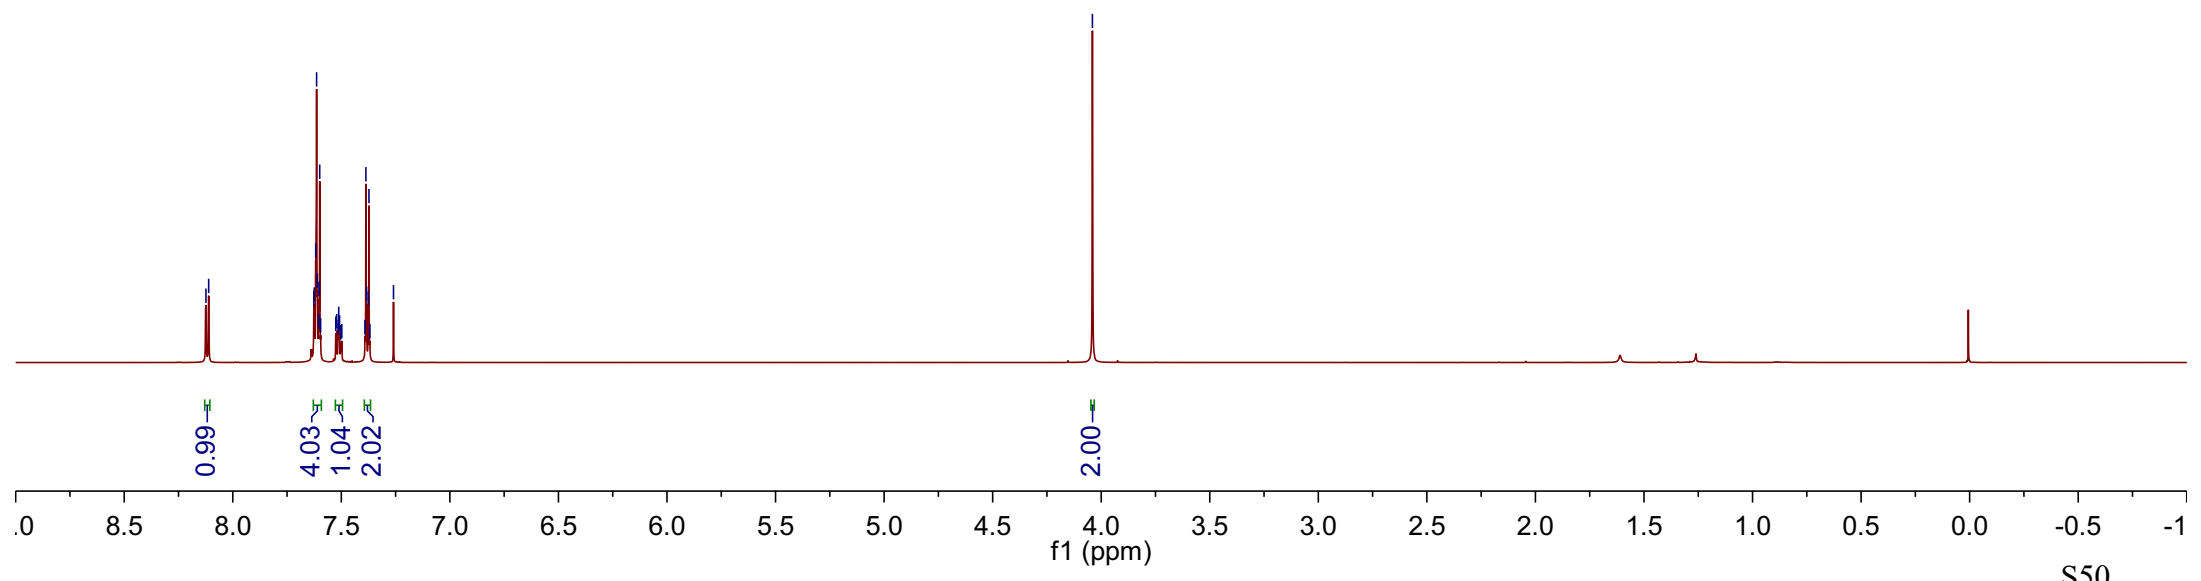

—192.09

136.93  
135.32  
133.93  
133.07  
130.85  
130.14  
129.82  
129.05  
126.60  
125.08  
—117.70

—22.34

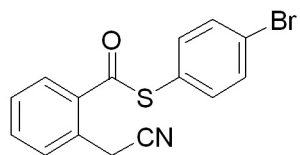

**10**

| Parameter              | Value             |
|------------------------|-------------------|
| Solvent                | CDCl <sub>3</sub> |
| Spectrometer Frequency | 150               |

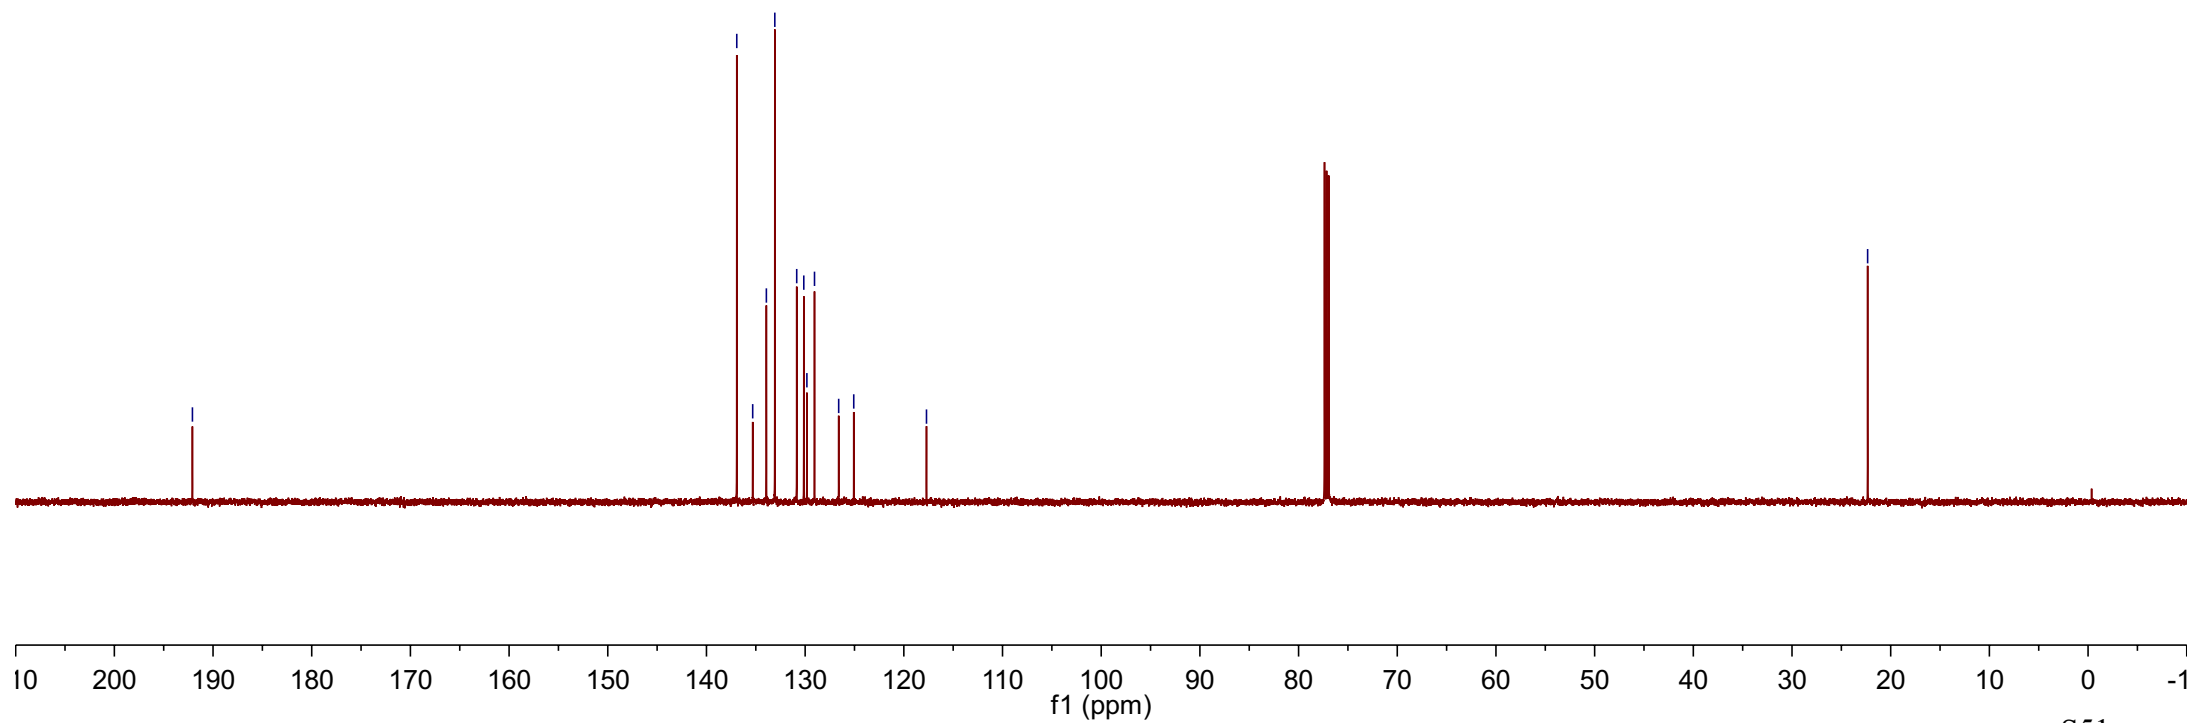

8.12  
8.11  
7.68  
7.68  
7.68  
7.63  
7.63  
7.62  
7.61  
7.61  
7.60  
7.60  
7.60  
7.53  
7.52  
7.52  
7.51  
7.50  
7.47  
7.46  
7.46  
7.37  
7.36  
7.34  
7.26

4.05

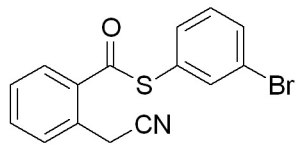

11

| Parameter              | Value |
|------------------------|-------|
| Solvent                | CDCl3 |
| Spectrometer Frequency | 600   |

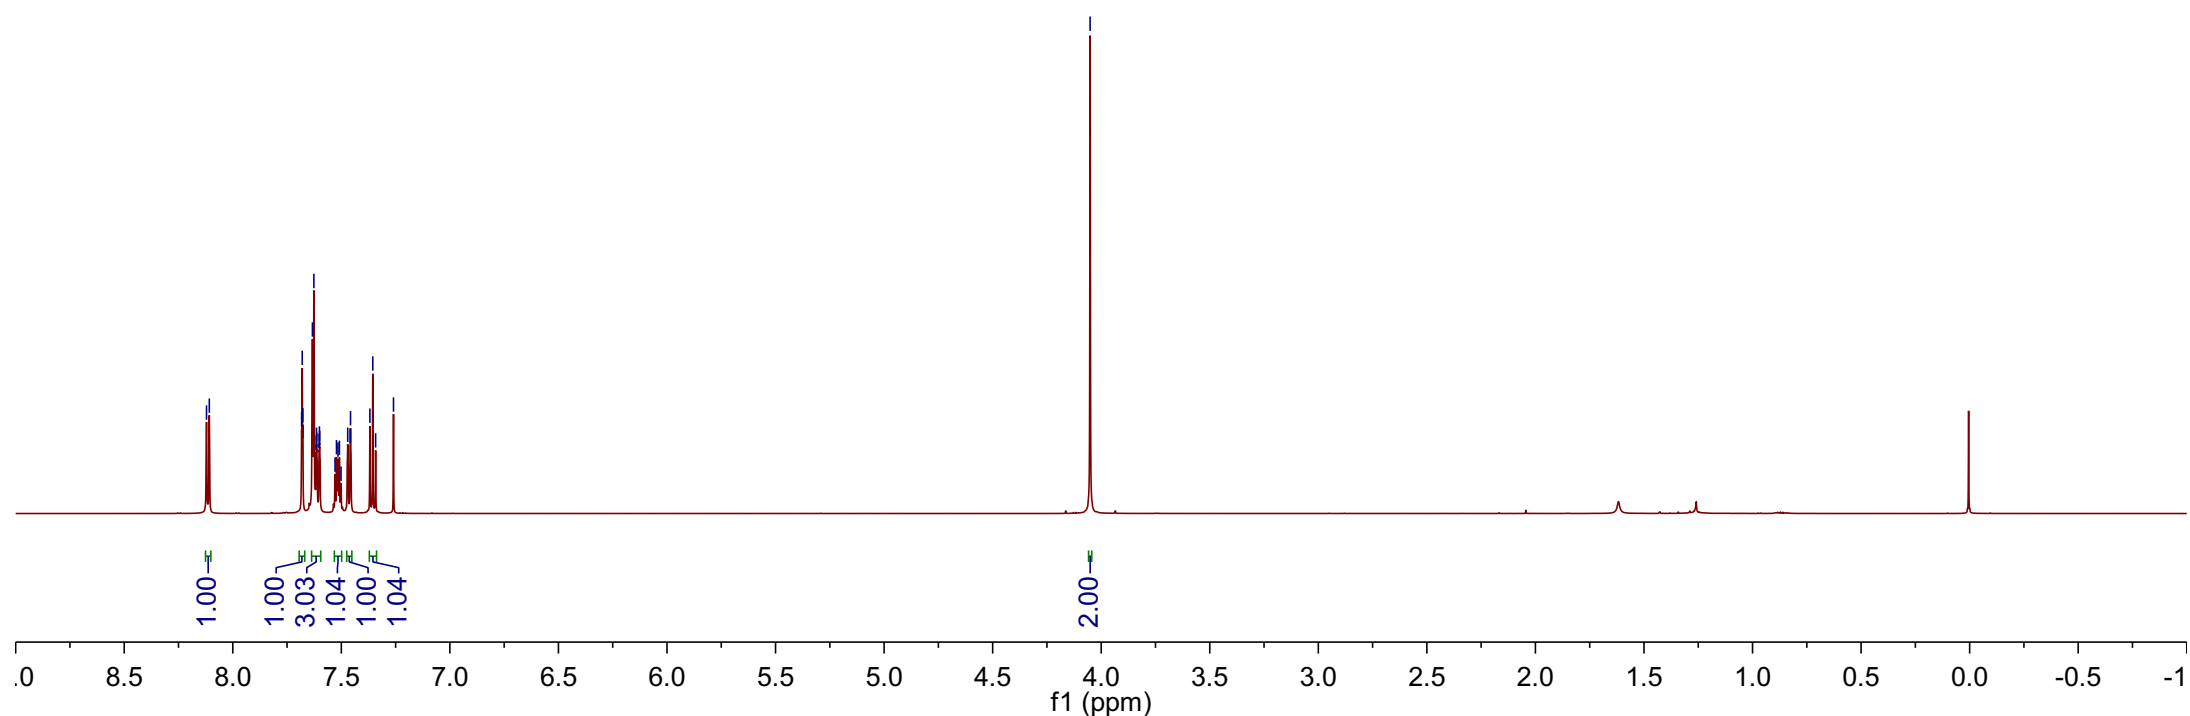

—191.85

137.91  
135.27  
134.09  
133.99  
133.41  
131.10  
130.84  
130.16  
129.87  
129.54  
129.07  
123.24  
117.71

—22.34

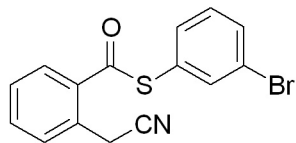

11

| Parameter              | Value             |
|------------------------|-------------------|
| Solvent                | CDCl <sub>3</sub> |
| Spectrometer Frequency | 150               |

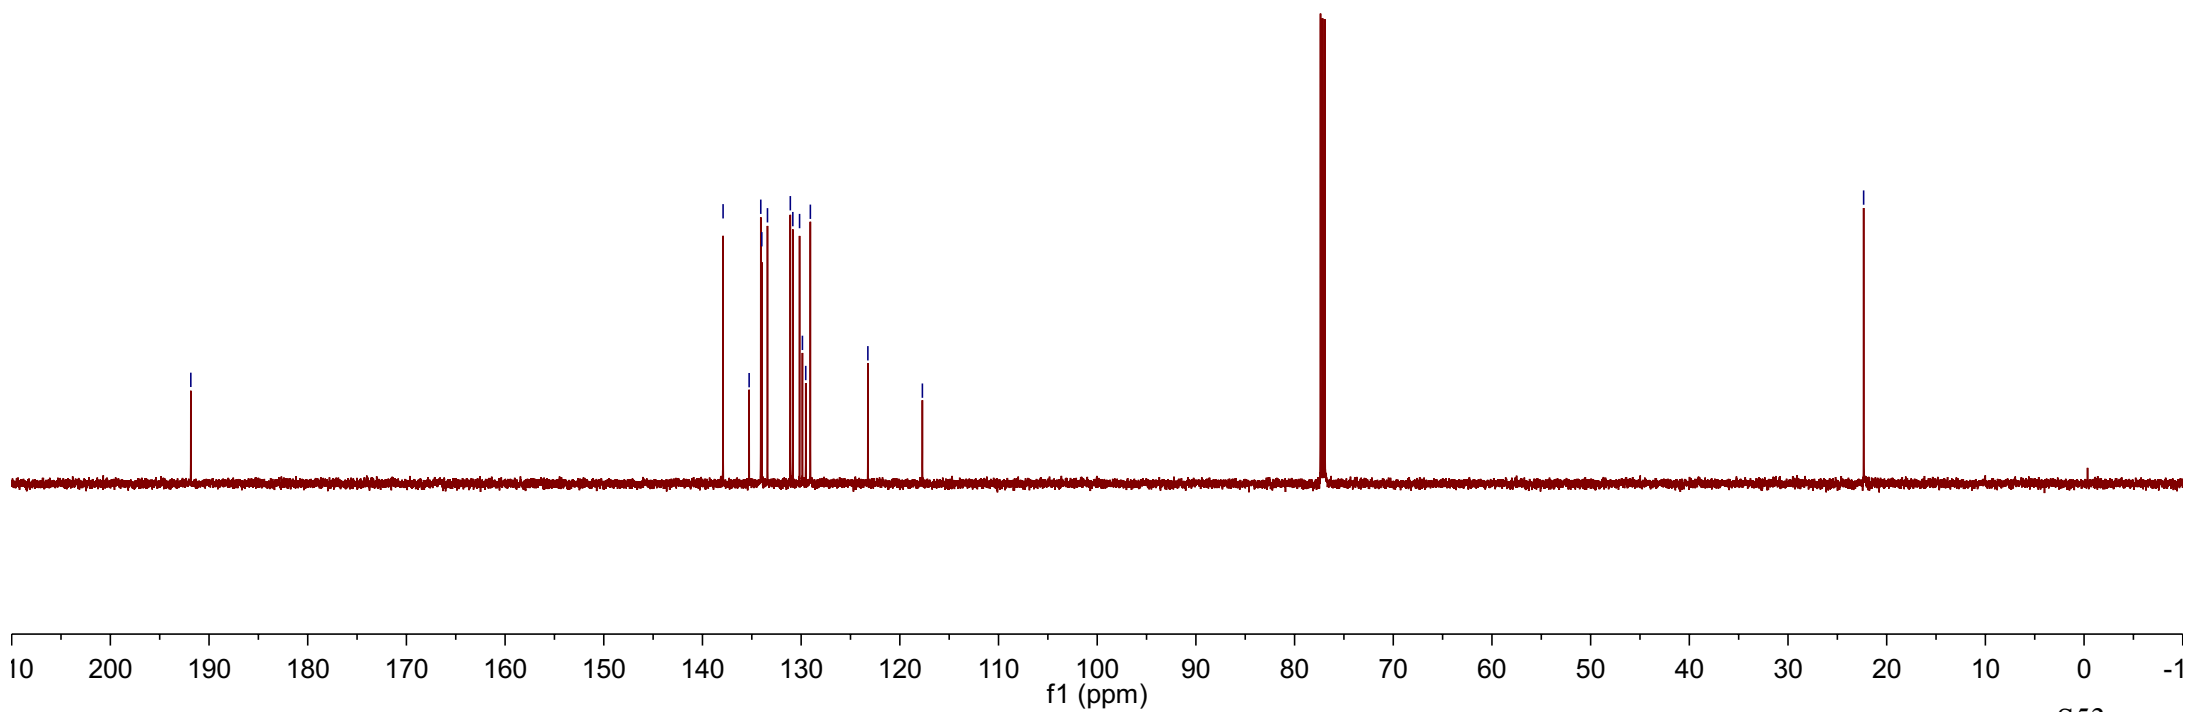

8.17  
8.16  
7.77  
7.77  
7.76  
7.76  
7.65  
7.65  
7.64  
7.64  
7.63  
7.63  
7.63  
7.63  
7.53  
7.53  
7.52  
7.44  
7.44  
7.43  
7.42  
7.41  
7.41  
7.36  
7.36  
7.35  
7.35  
7.34  
7.26  
4.06

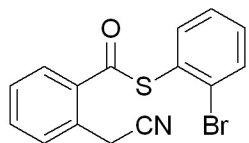

12

| Parameter              | Value |
|------------------------|-------|
| Solvent                | CDCl3 |
| Spectrometer Frequency | 600   |

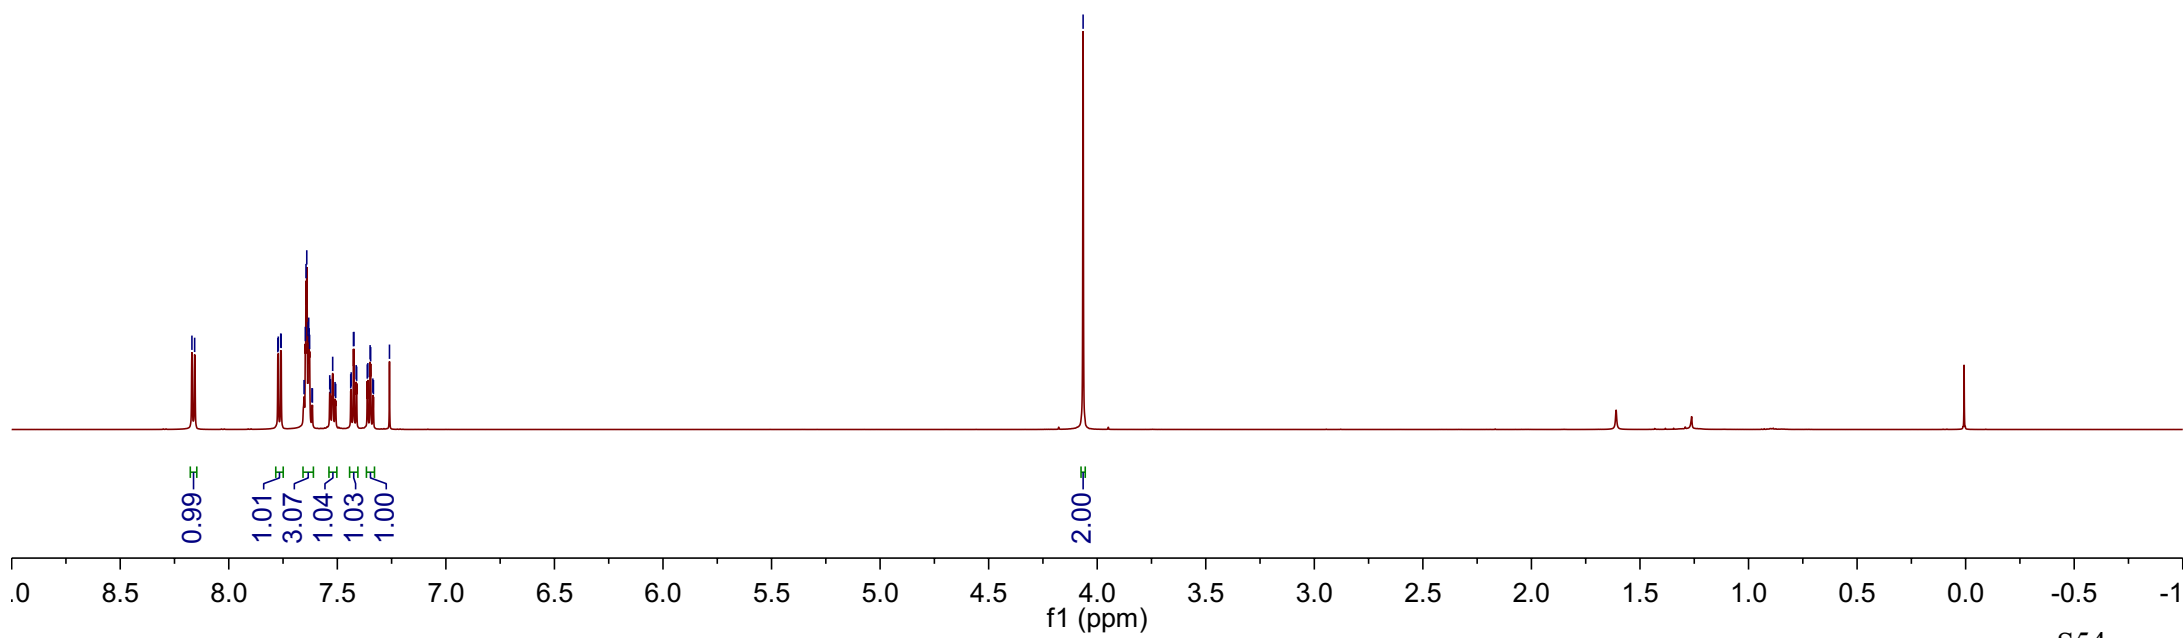



12

—191.05

137.98  
135.42  
134.21  
133.88  
132.10  
130.64  
130.43  
130.14  
129.80  
129.38  
129.03  
128.63  
—117.76

—22.16

| Parameter              | Value |
|------------------------|-------|
| Solvent                | CDCl3 |
| Spectrometer Frequency | 150   |

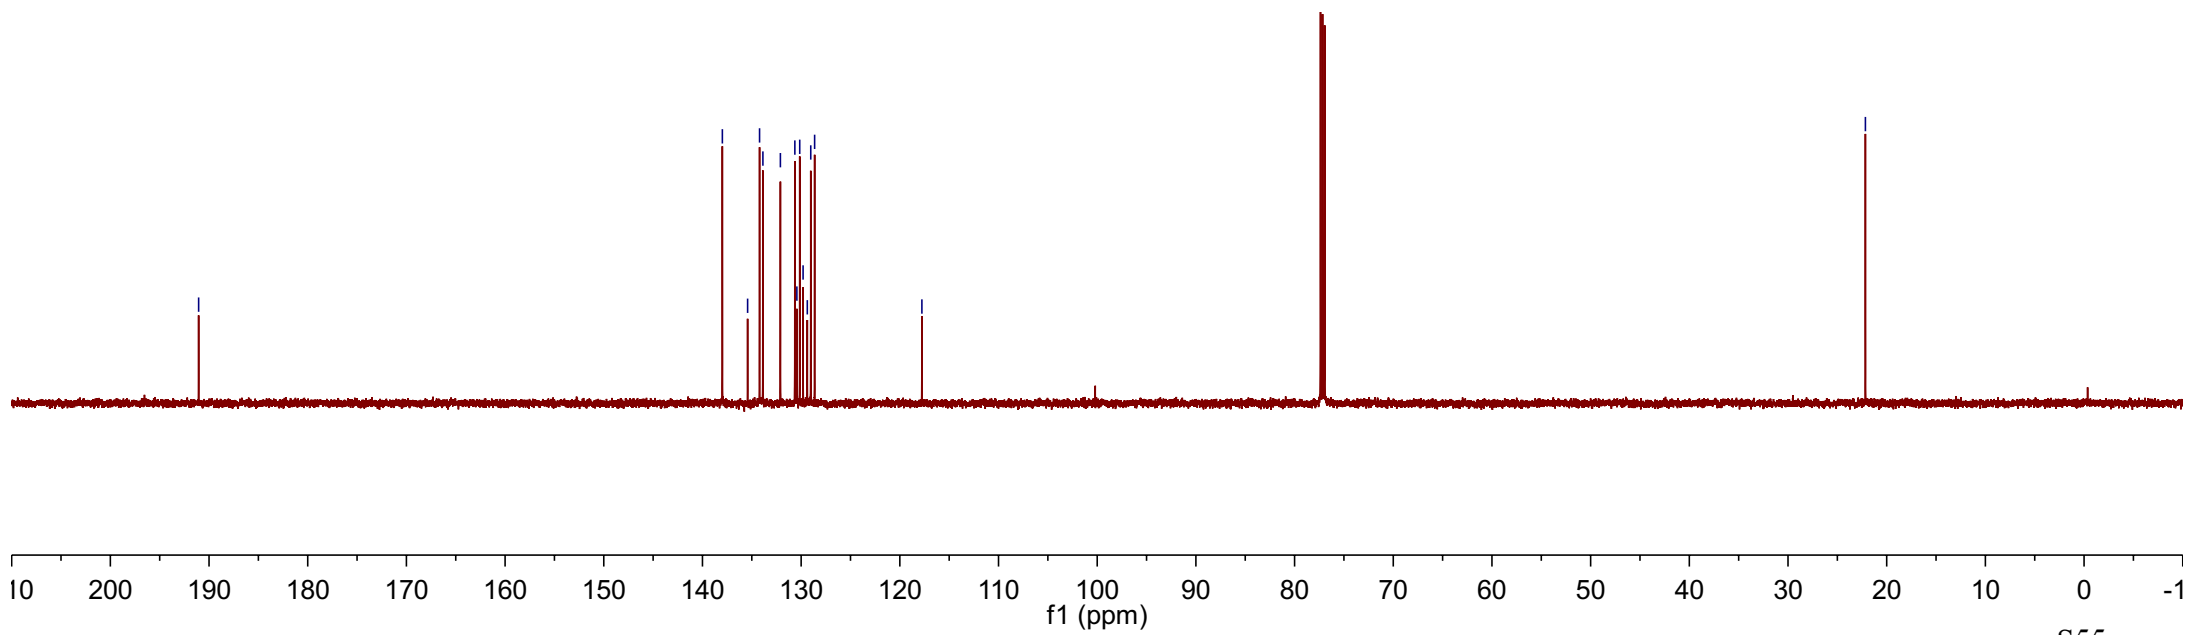

8.15  
8.13  
7.74  
7.72  
7.67  
7.66  
7.64  
7.63  
7.61  
7.54  
7.54  
7.53  
7.52  
7.52  
7.26

4.04

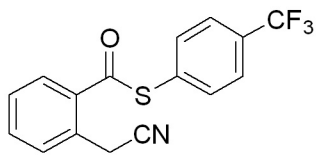

13

| Parameter              | Value |
|------------------------|-------|
| Solvent                | CDCl3 |
| Spectrometer Frequency | 600   |

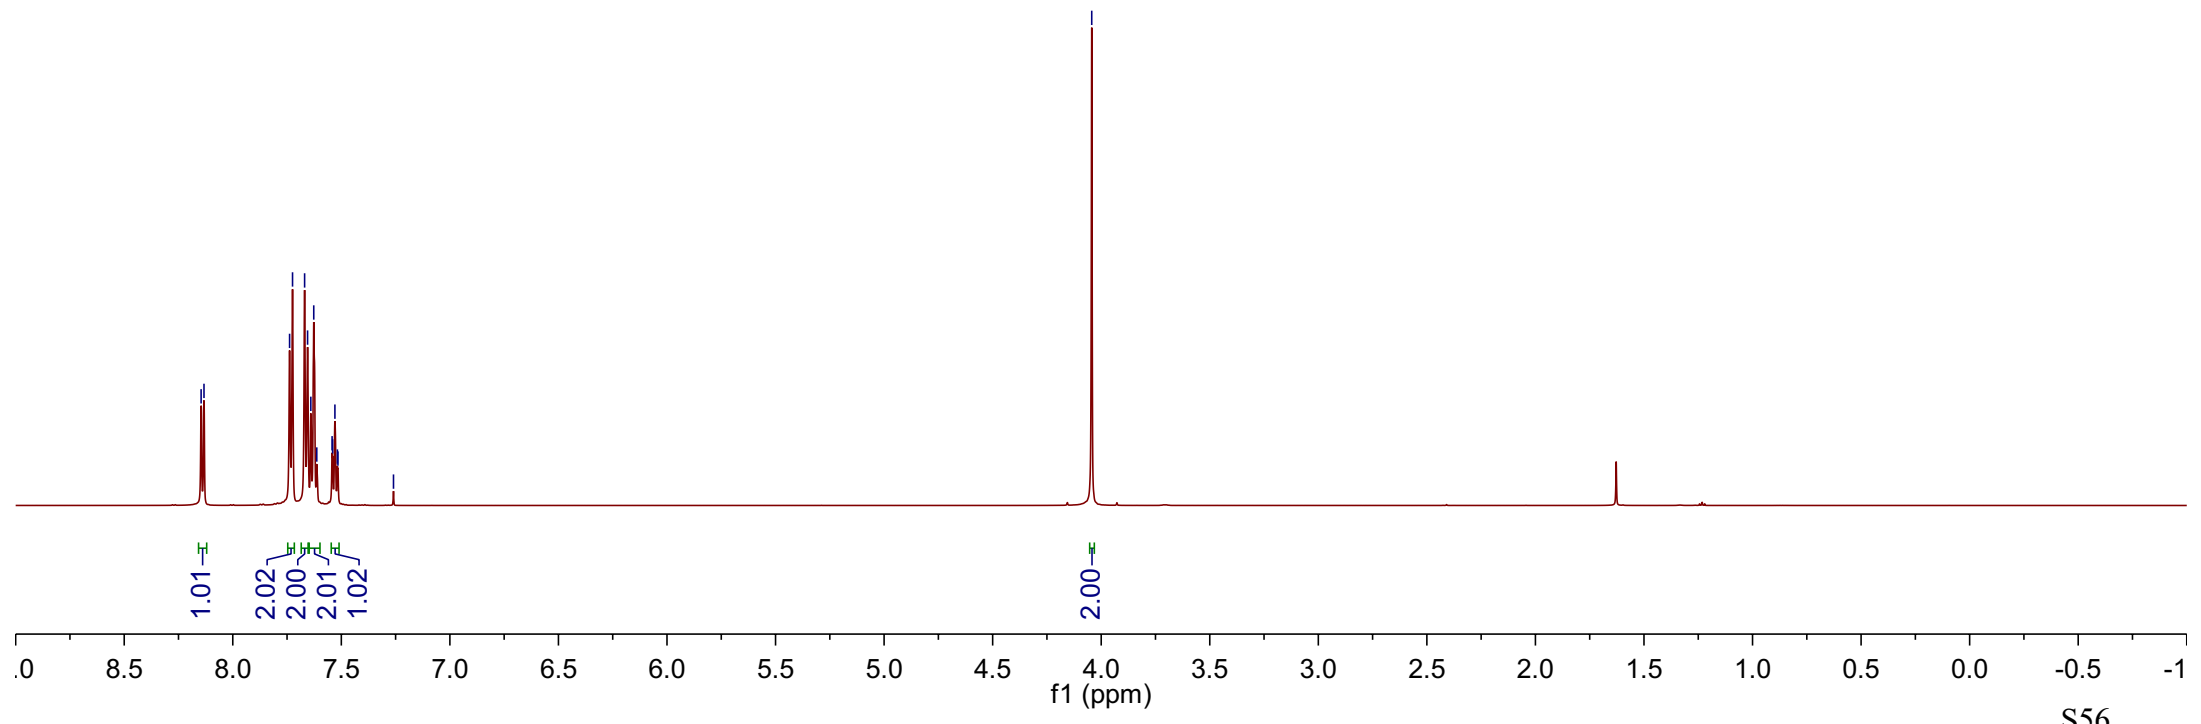



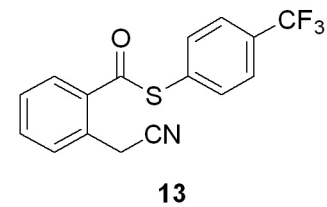

—191.49

135.66  
 135.22  
 134.09  
 132.52  
 132.29  
 132.28  
 132.08  
 131.86  
 130.97  
 130.17  
 129.95  
 129.13  
 126.85  
 126.59  
 126.56  
 126.54  
 126.51  
 125.04  
 123.22  
 121.41  
 117.66

—22.36

| Parameter              | Value |
|------------------------|-------|
| Solvent                | CDCl3 |
| Spectrometer Frequency | 150   |

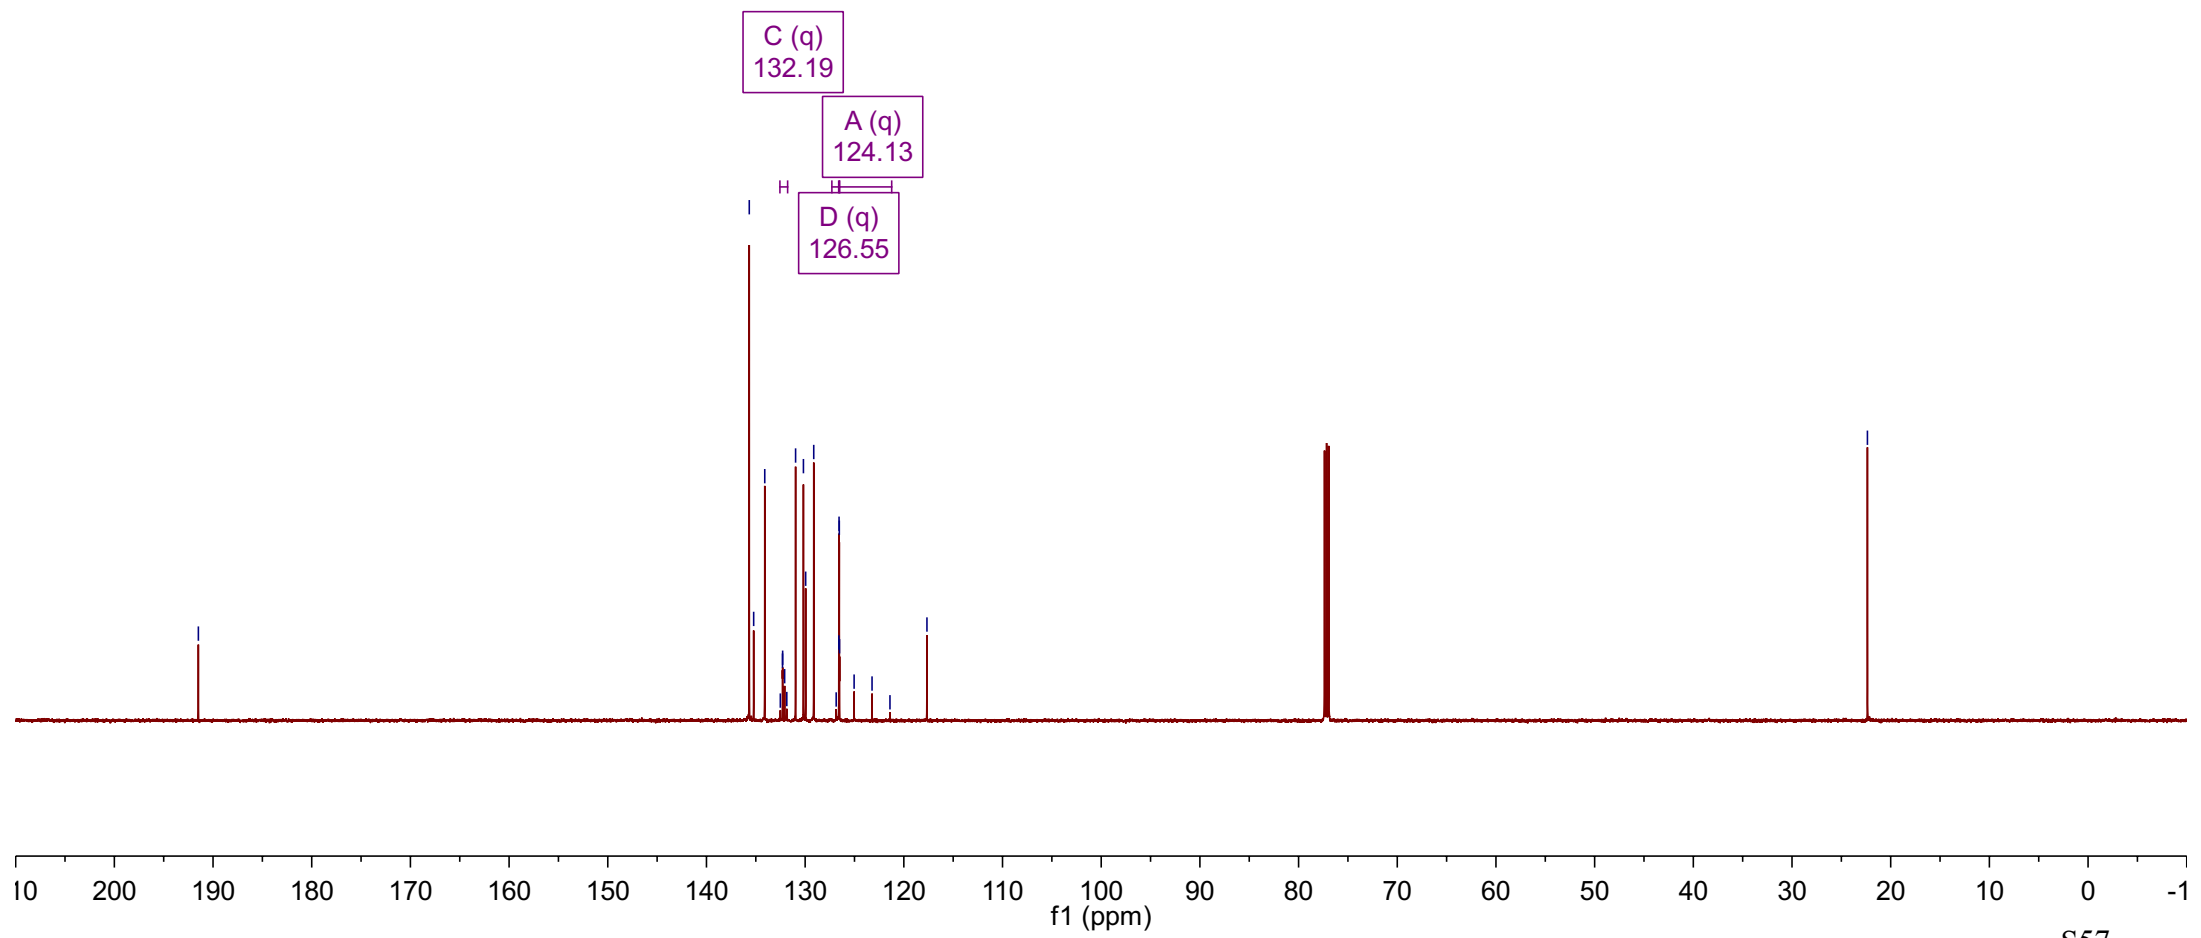

8.13  
8.11  
7.76  
7.74  
7.66  
7.65  
7.65  
7.62  
7.61  
7.55  
7.54  
7.53  
7.26

4.04

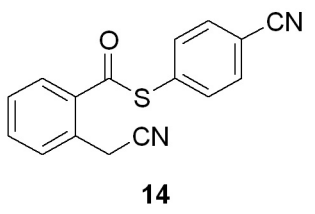

| Parameter              | Value             |
|------------------------|-------------------|
| Solvent                | CDCl <sub>3</sub> |
| Spectrometer Frequency | 600               |

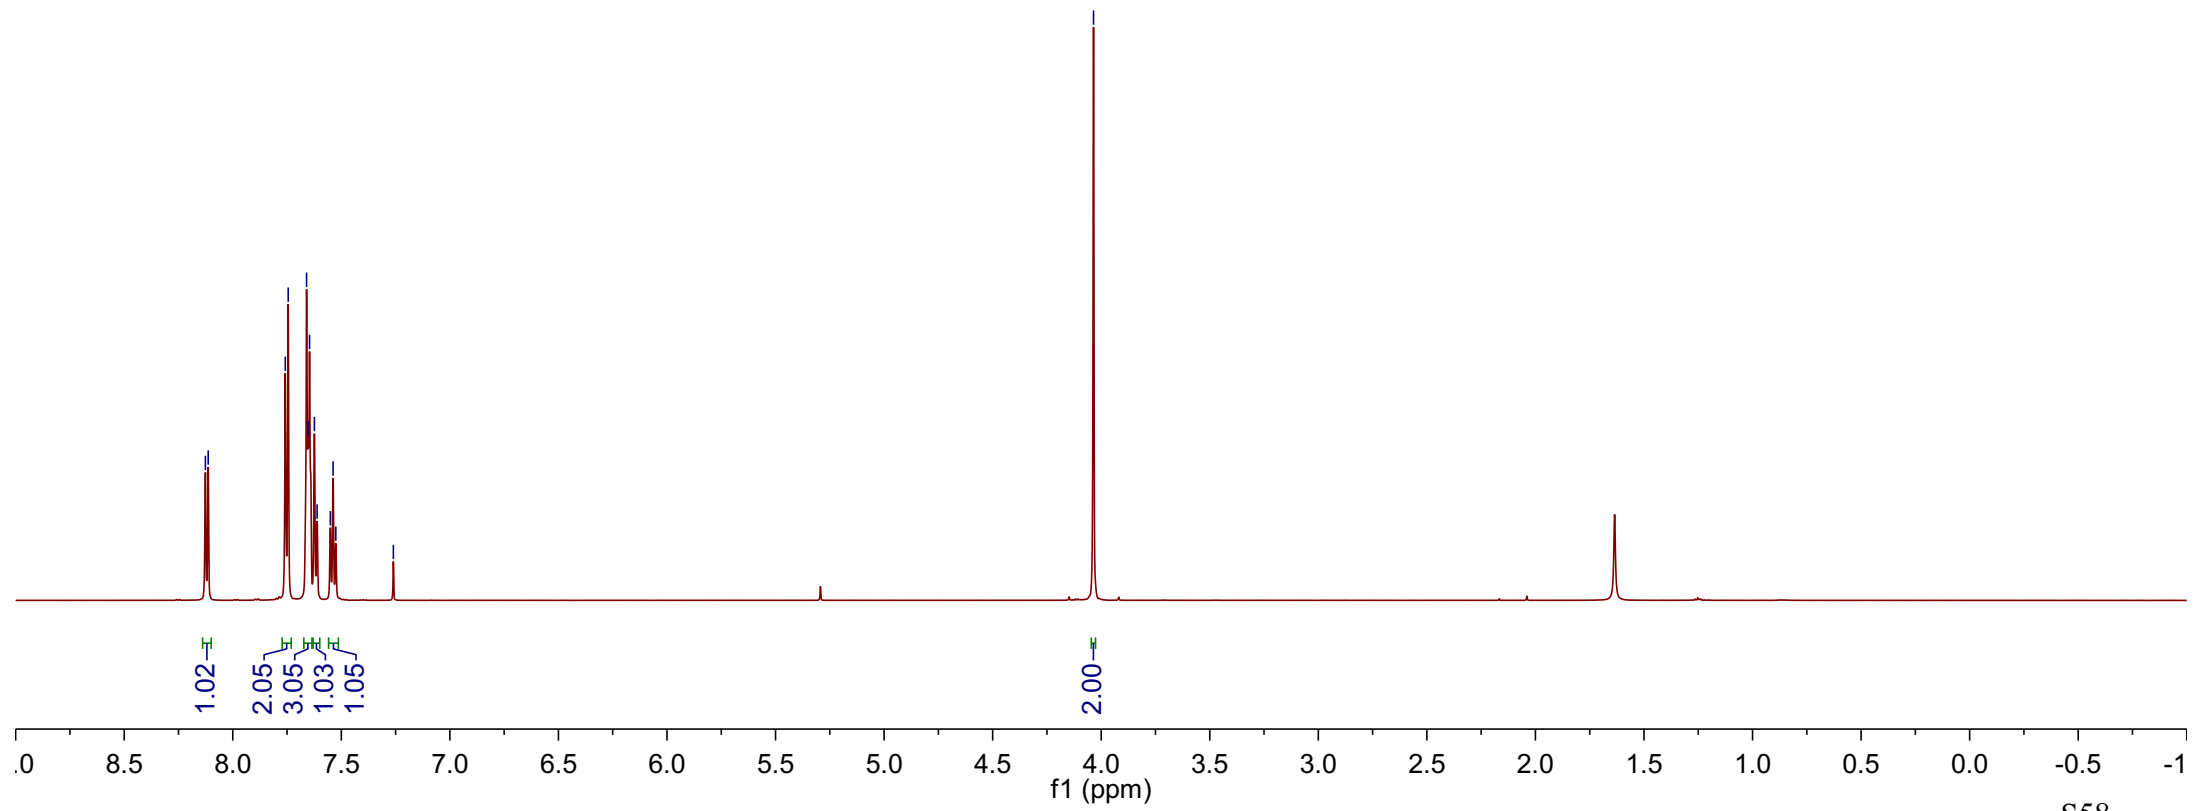

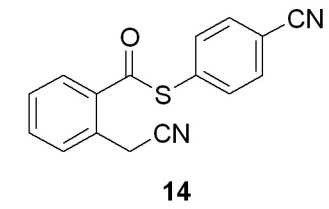

—190.84

135.83  
 135.02  
 134.29  
 133.95  
 133.13  
 131.10  
 130.20  
 130.04  
 129.23  
 118.45  
 117.61  
 113.82

—22.44

| Parameter              | Value             |
|------------------------|-------------------|
| Solvent                | CDCl <sub>3</sub> |
| Spectrometer Frequency | 150               |

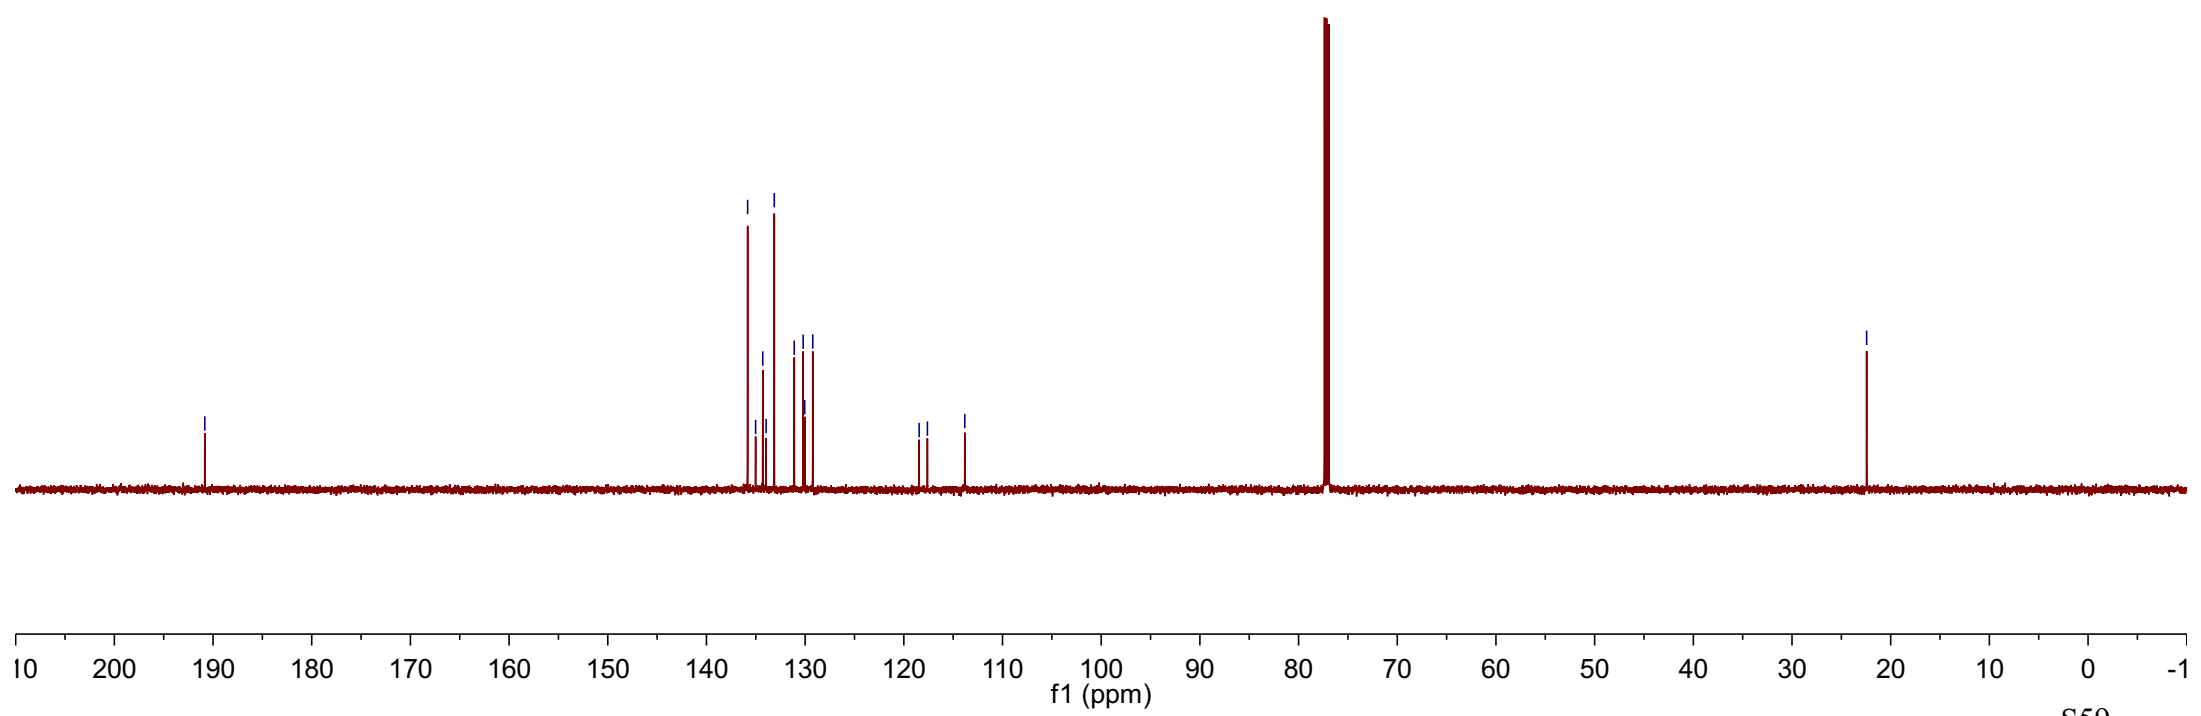

8.14  
8.13  
7.65  
7.64  
7.63  
7.61  
7.60  
7.55  
7.54  
7.54  
7.53  
7.51  
7.26

4.05  
3.95

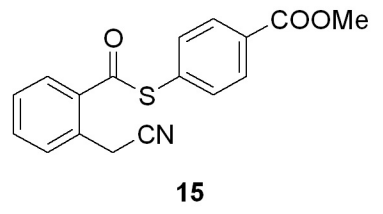

| Parameter              | Value |
|------------------------|-------|
| Solvent                | CDCl3 |
| Spectrometer Frequency | 600   |

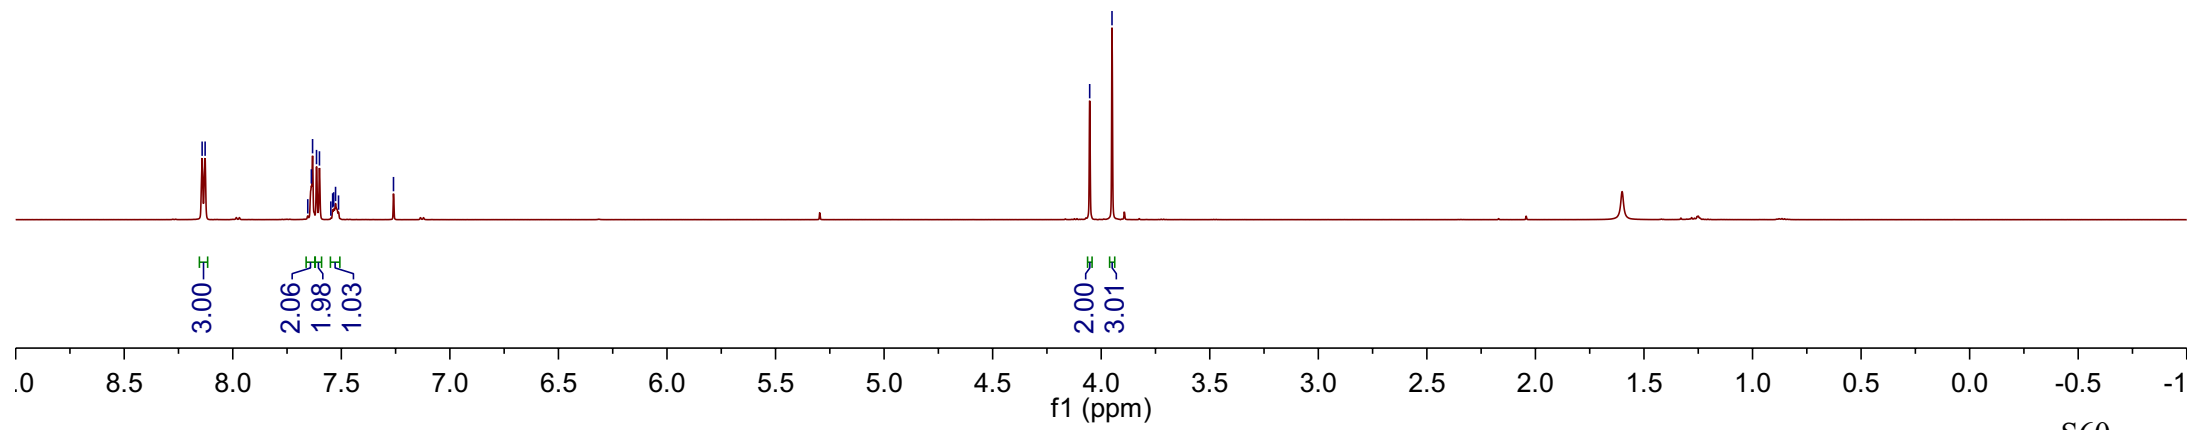

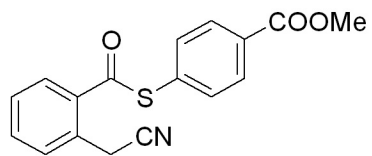

15

—191.68 —167.02  
 135.38 135.22 134.05 133.25 131.74 130.90 130.78 130.23 129.92 129.13 —117.75

—52.41 —22.40

| Parameter              | Value |
|------------------------|-------|
| Solvent                | CDCl3 |
| Spectrometer Frequency | 150   |

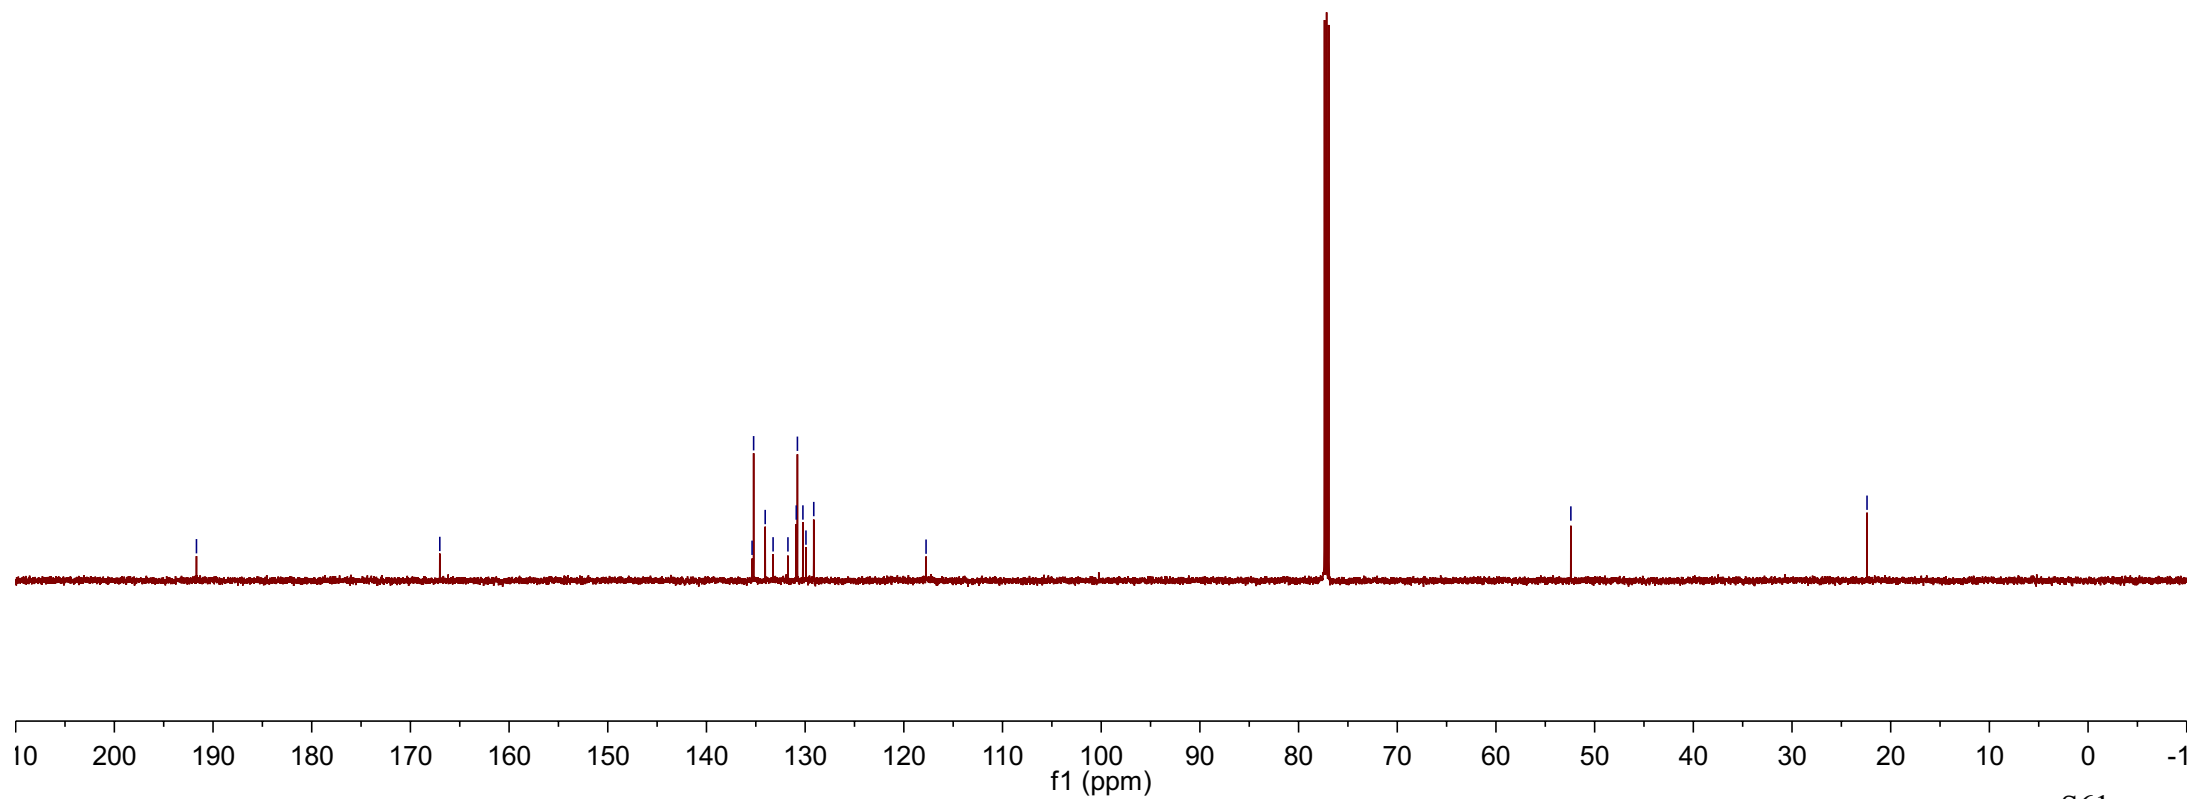

8.14  
8.13  
7.64  
7.63  
7.61  
7.60  
7.51  
7.50  
7.49  
7.26  
7.15  
7.11

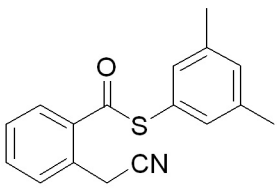

16

4.07

2.38

| Parameter              | Value |
|------------------------|-------|
| Solvent                | CDCl3 |
| Spectrometer Frequency | 600   |

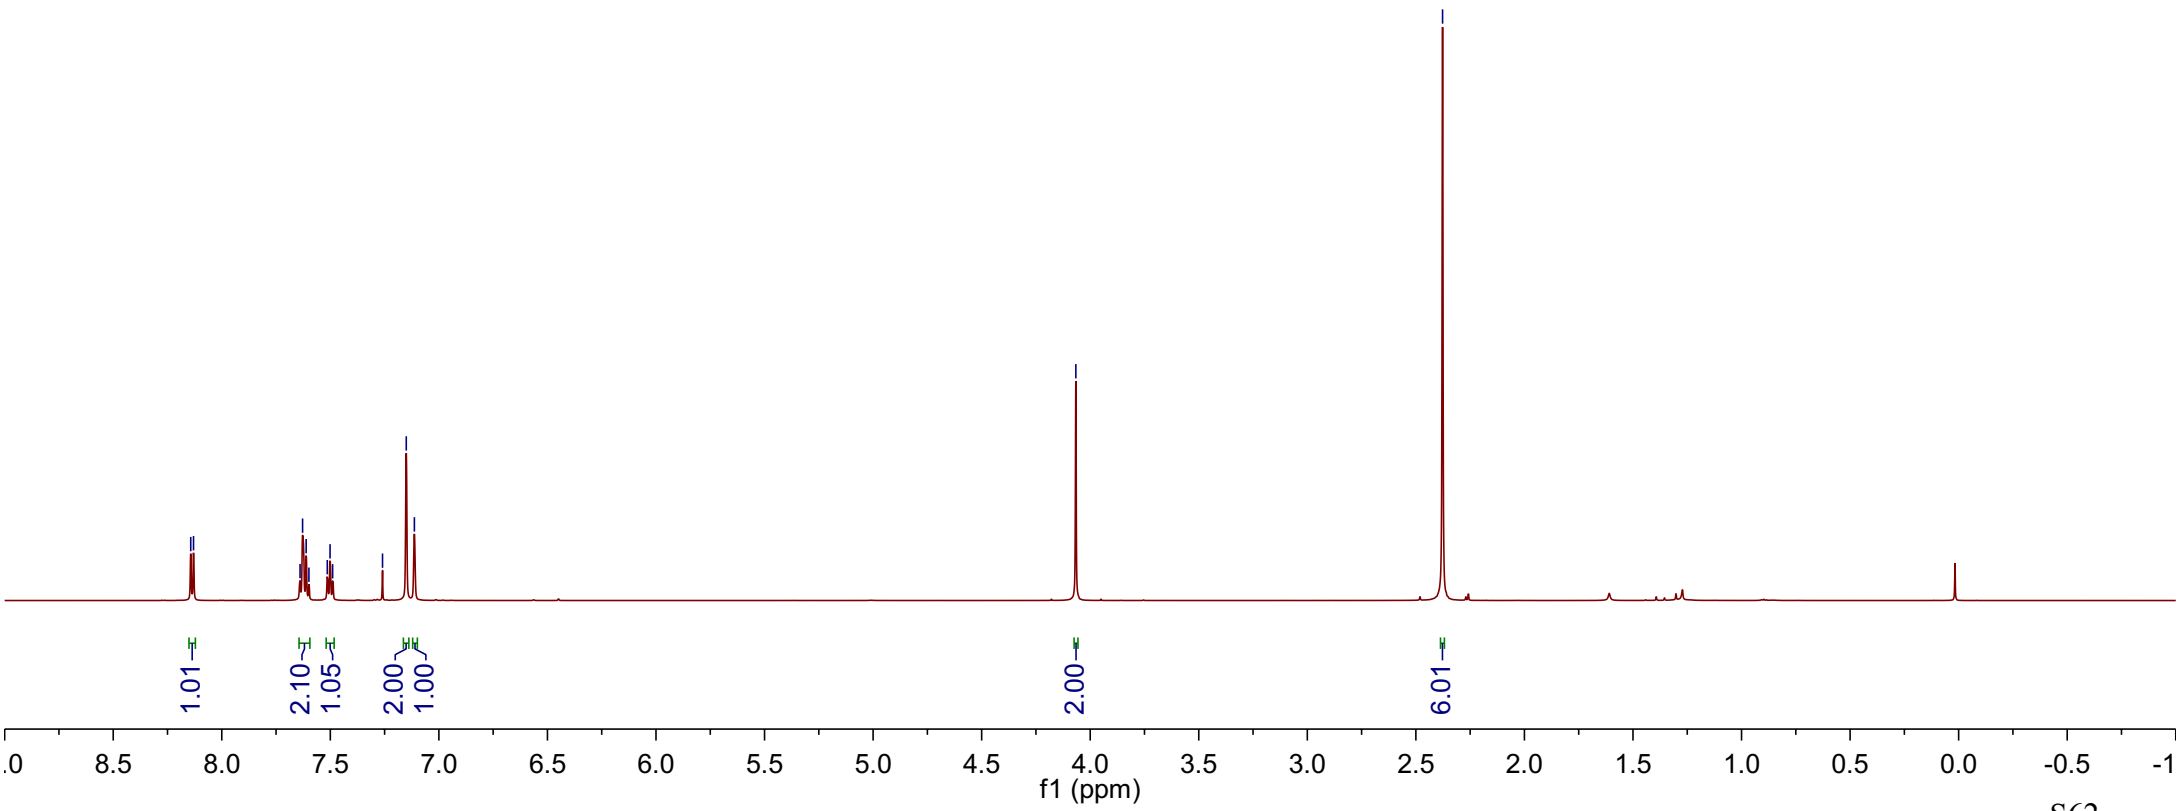

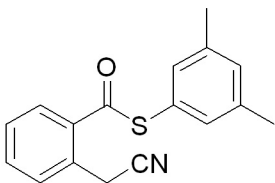

16

| Parameter              | Value             |
|------------------------|-------------------|
| Solvent                | CDCl <sub>3</sub> |
| Spectrometer Frequency | 150               |

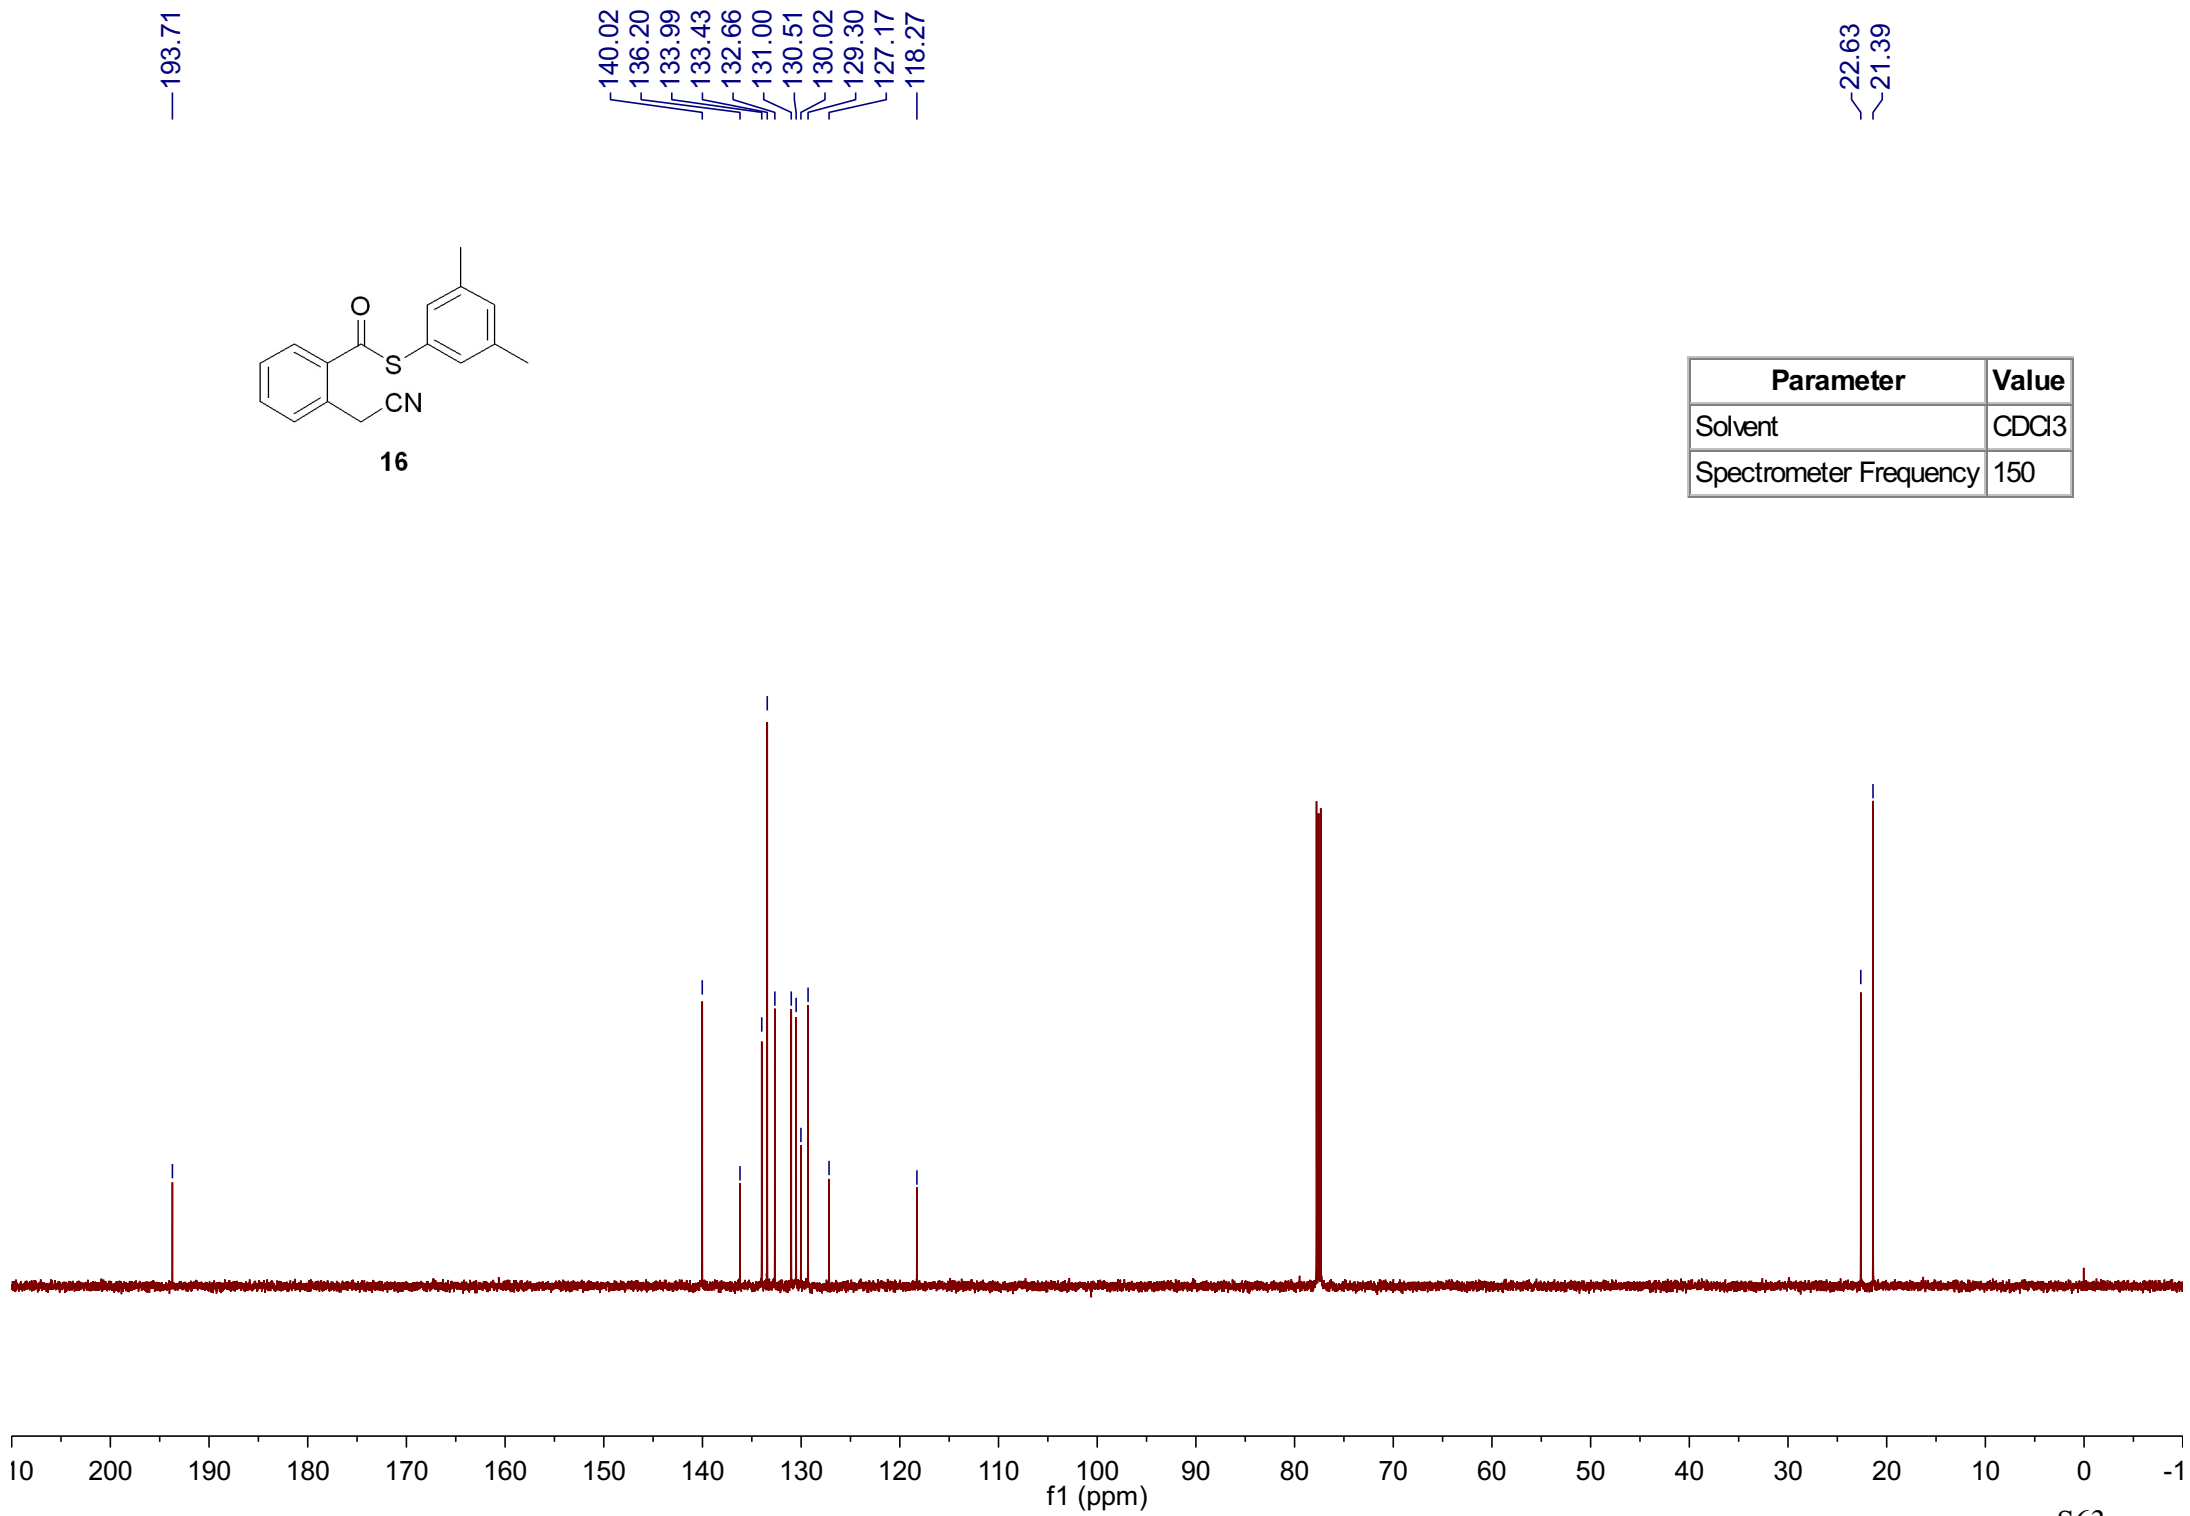

8.27  
8.25  
7.64  
7.64  
7.63  
7.63  
7.62  
7.62  
7.61  
7.55  
7.54  
7.54  
7.53  
7.53  
7.52  
7.52  
7.32  
7.31  
7.29  
7.26  
7.24  
7.23

4.05

2.44

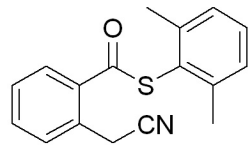

17

| Parameter              | Value |
|------------------------|-------|
| Solvent                | CDCl3 |
| Spectrometer Frequency | 600   |

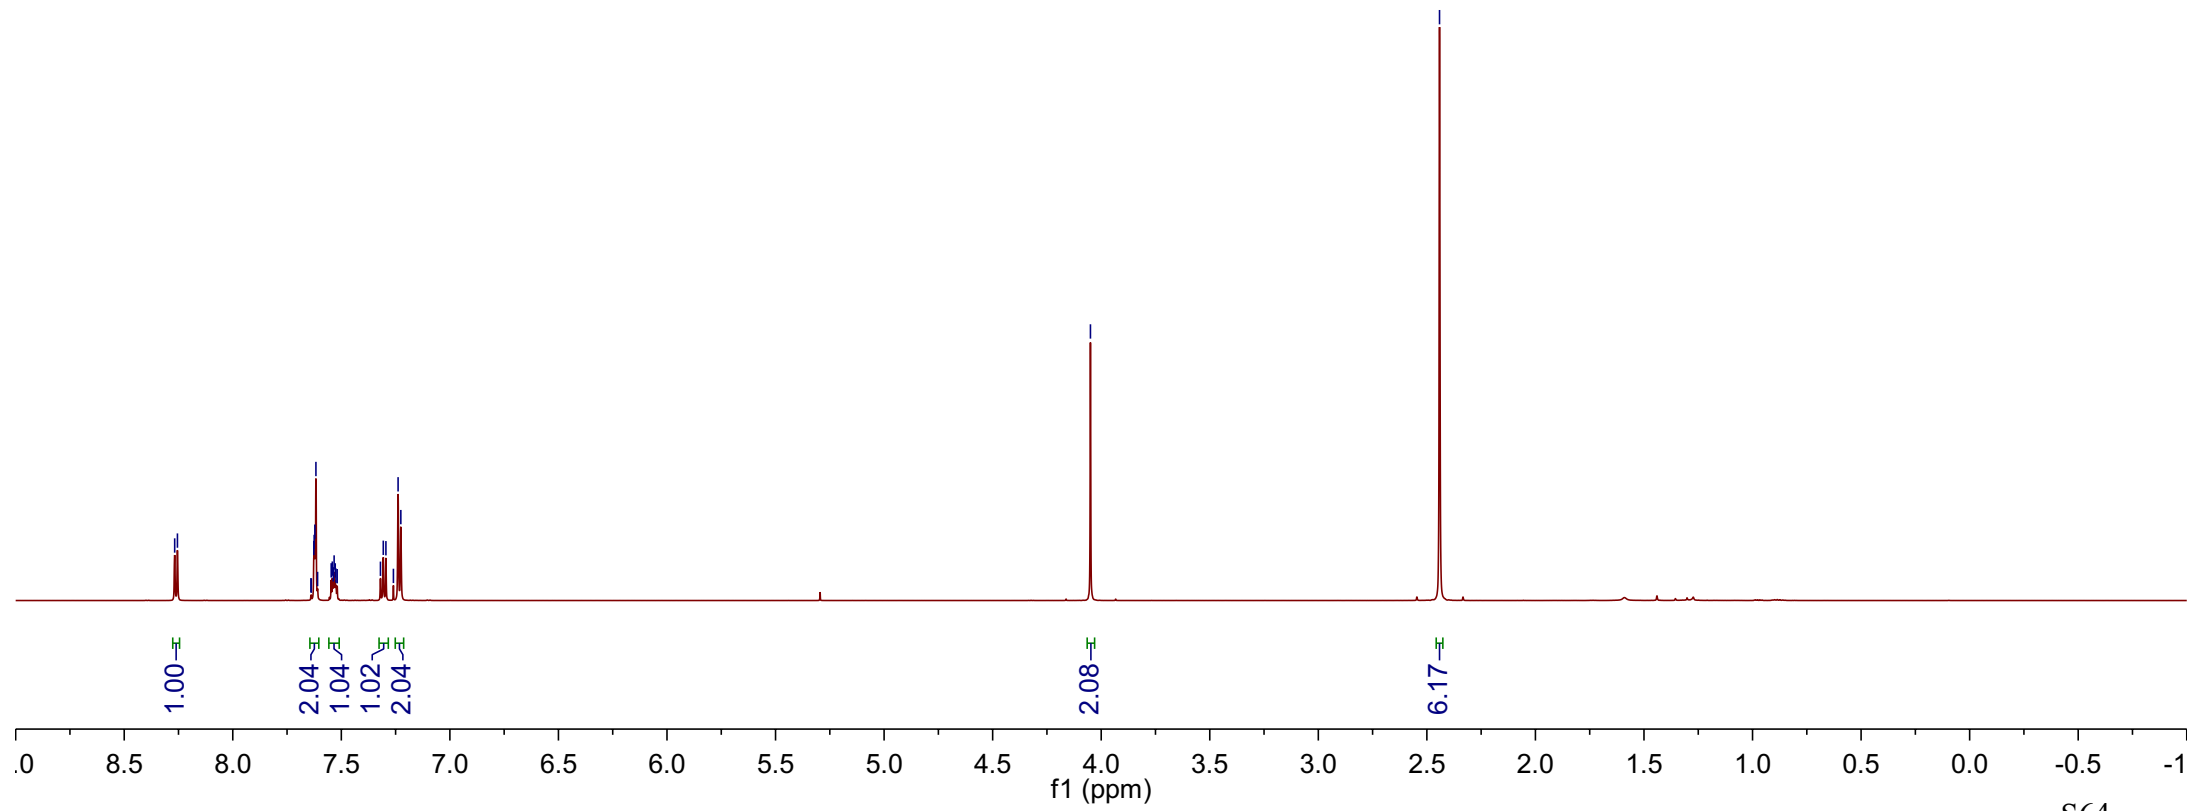



—191.98

—143.60  
—136.05  
—133.59  
—130.74  
—130.40  
—129.74  
—128.99  
—127.86

—22.21  
—21.55

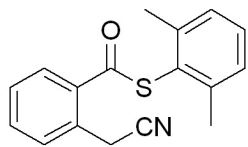

17

| Parameter              | Value             |
|------------------------|-------------------|
| Solvent                | CDCl <sub>3</sub> |
| Spectrometer Frequency | 150               |

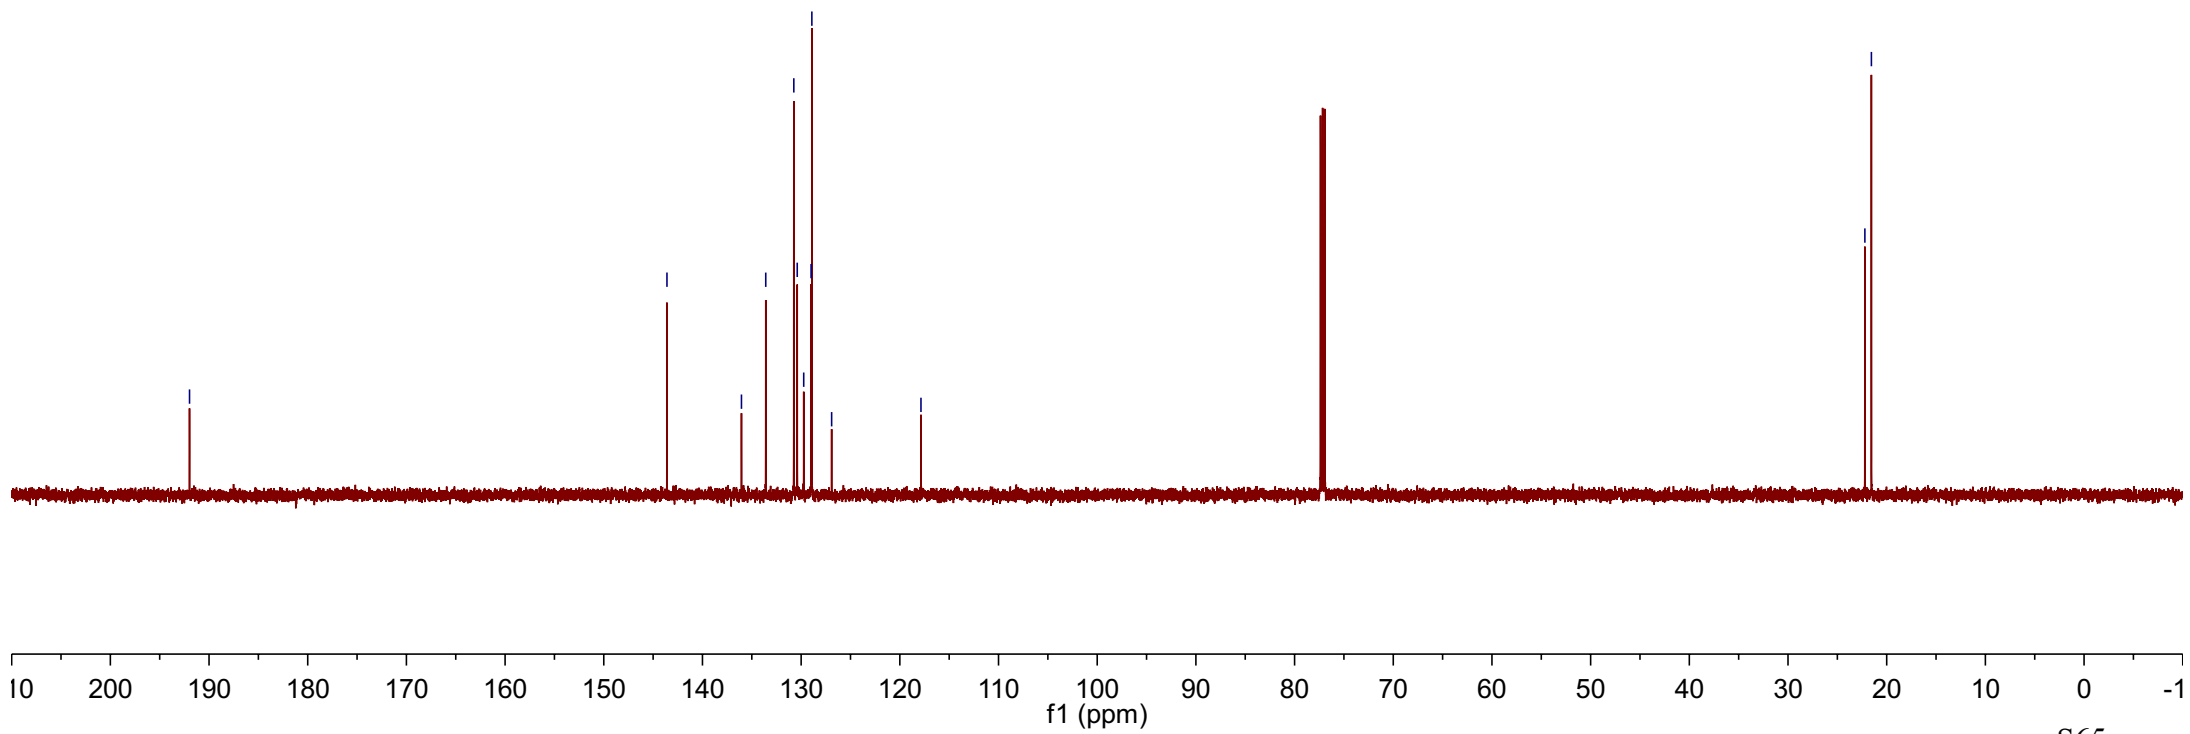

8.19  
8.18  
7.67  
7.65  
7.65  
7.65  
7.64  
7.63  
7.62  
7.62  
7.54  
7.54  
7.53  
7.51  
7.51  
7.50  
7.50  
7.49  
7.37  
7.36  
7.35  
7.26

4.05

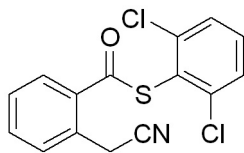

18

| Parameter              | Value |
|------------------------|-------|
| Solvent                | CDCl3 |
| Spectrometer Frequency | 600   |

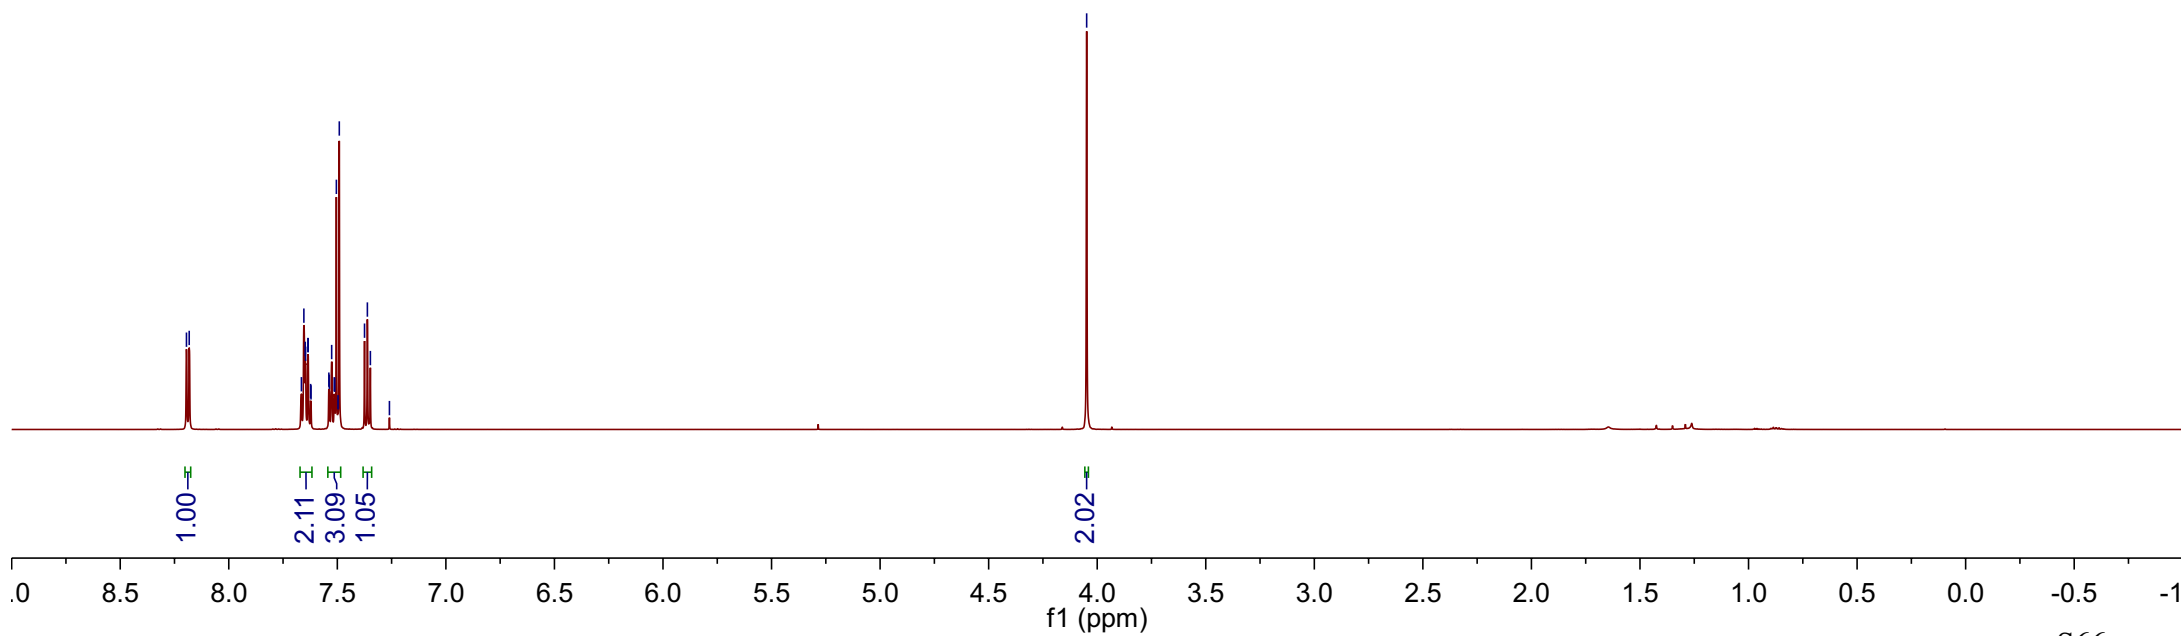

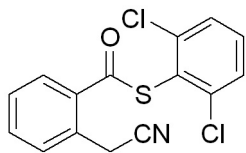

18

—189.22

—141.64

~133.99

~132.31

~130.55

~130.19

~129.18

~127.03

~117.64

—22.03

| Parameter              | Value |
|------------------------|-------|
| Solvent                | CDCl3 |
| Spectrometer Frequency | 150   |

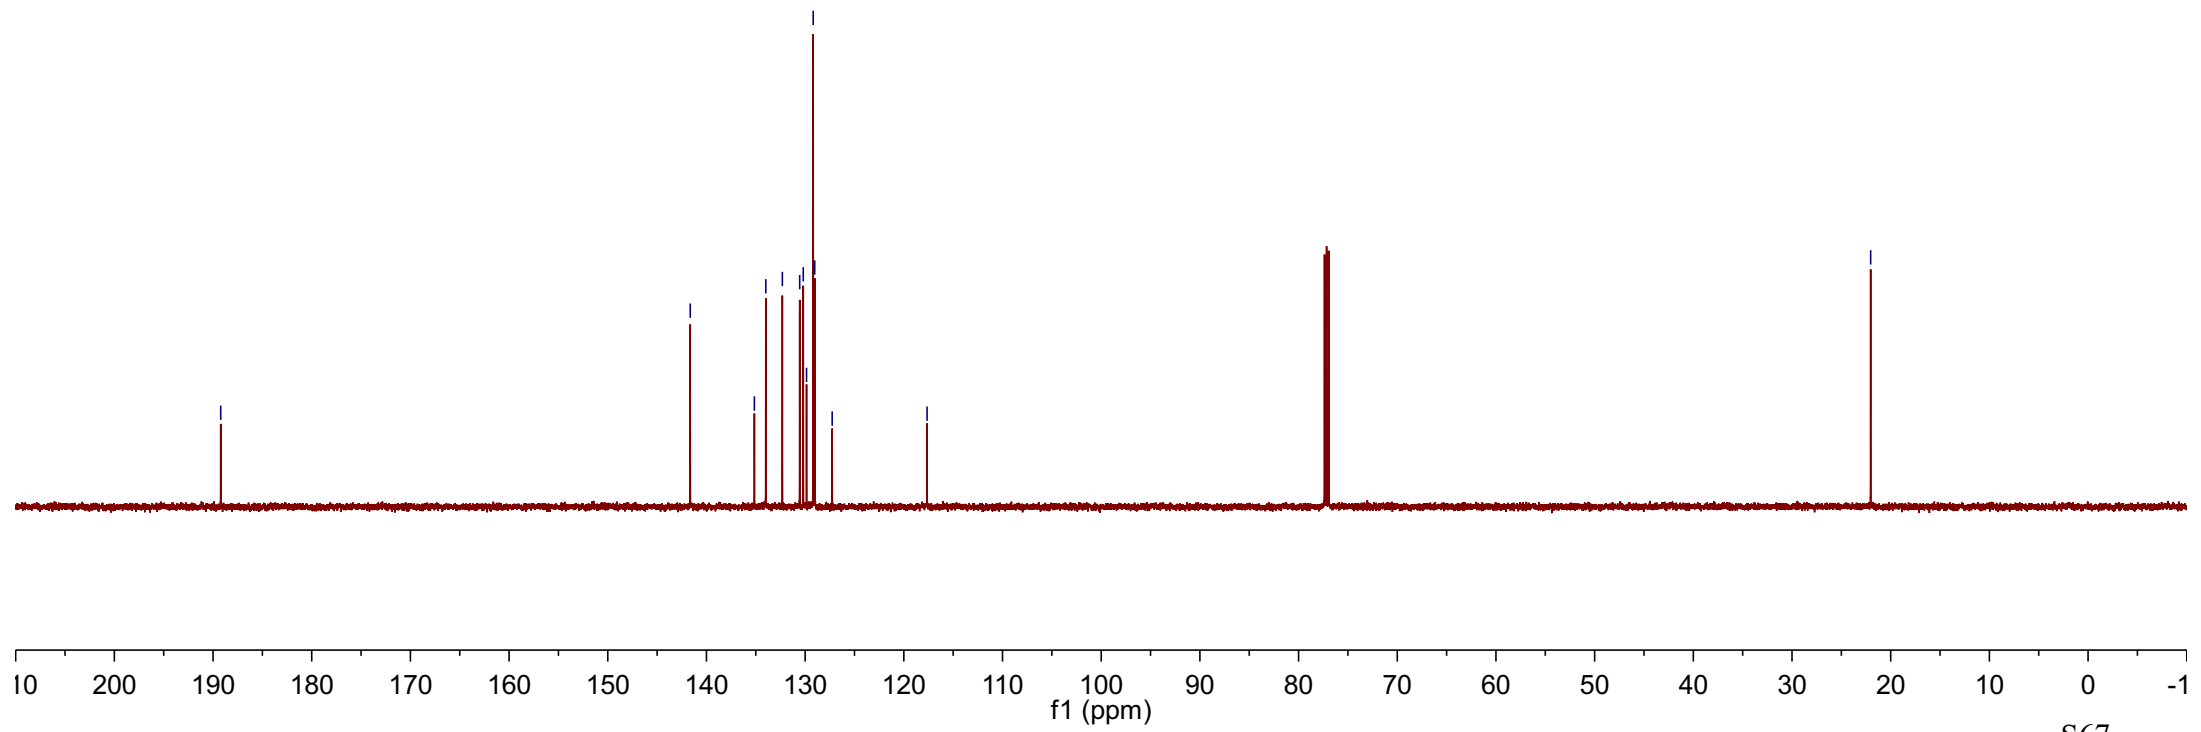

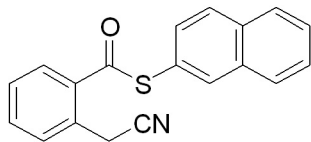

**19**

| Parameter              | Value             |
|------------------------|-------------------|
| Solvent                | CDCl <sub>3</sub> |
| Spectrometer Frequency | 600               |

8.21  
8.19  
8.06  
7.95  
7.94  
7.91  
7.89  
7.89  
7.87  
7.87  
7.65  
7.64  
7.64  
7.64  
7.63  
7.63  
7.59  
7.59  
7.58  
7.57  
7.56  
7.56  
7.55  
7.55  
7.54  
7.54  
7.53  
7.53  
7.52  
7.26

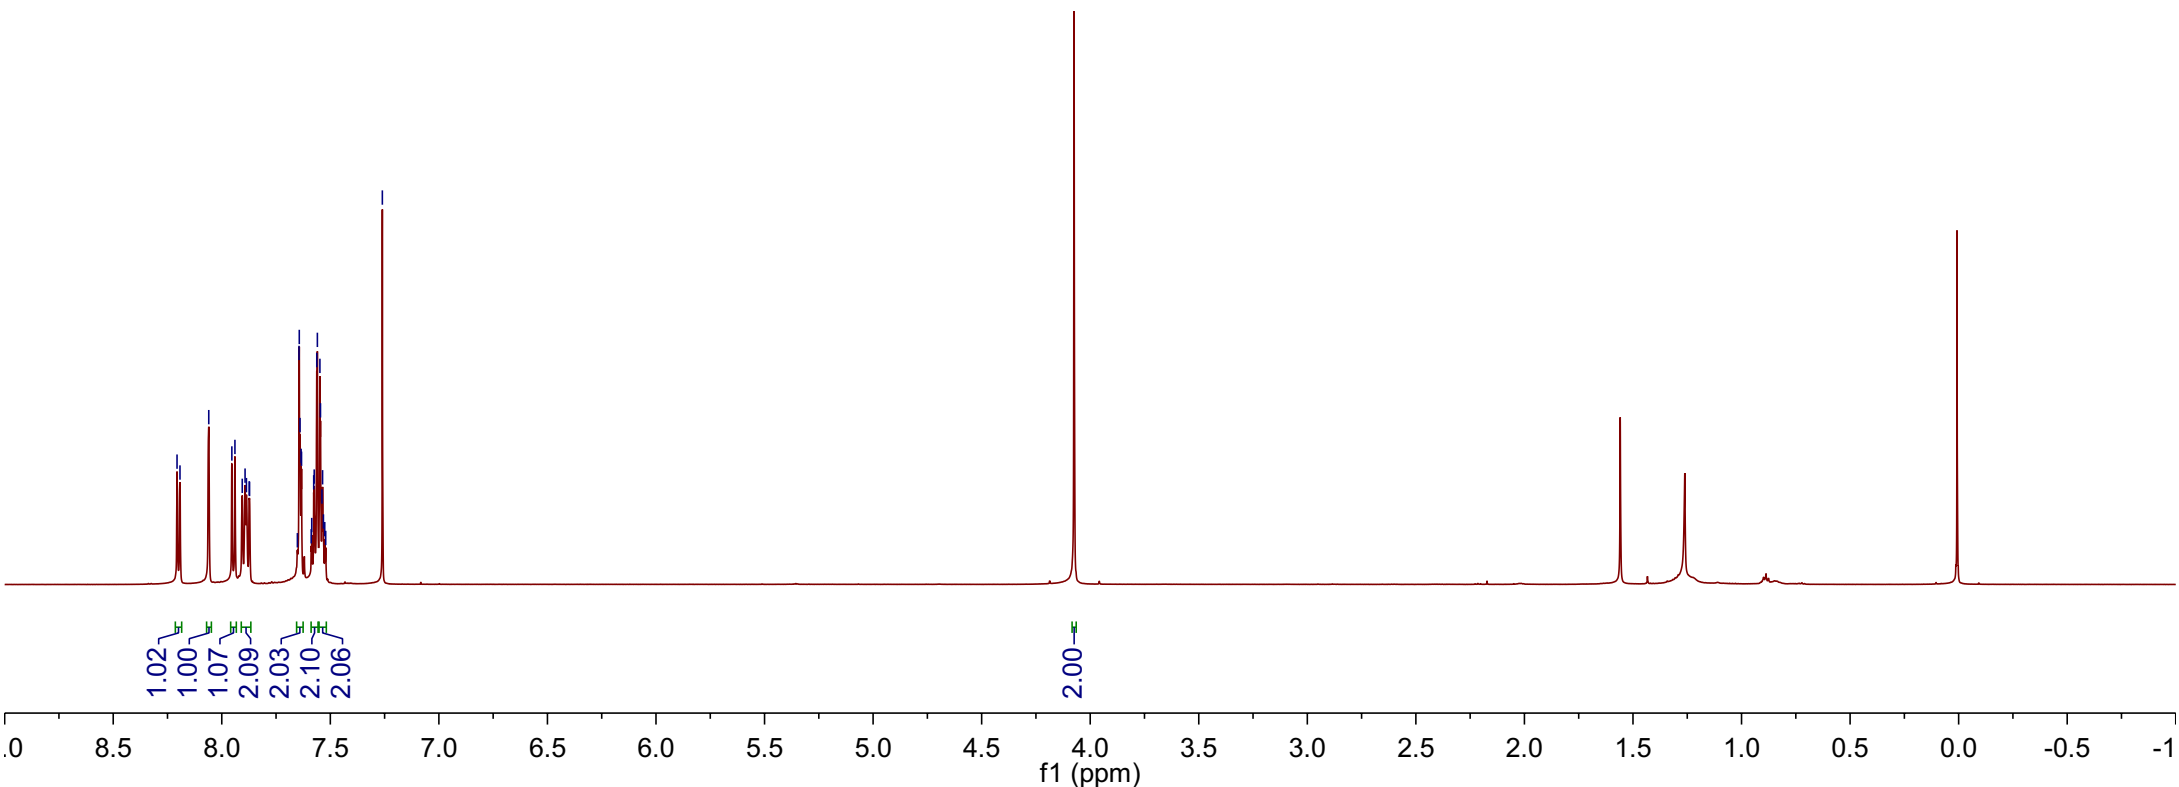

1.02  
1.00  
1.07  
2.09  
2.03  
2.10  
2.06

2.00



**19**

| Parameter              | Value             |
|------------------------|-------------------|
| Solvent                | CDCl <sub>3</sub> |
| Spectrometer Frequency | 150               |

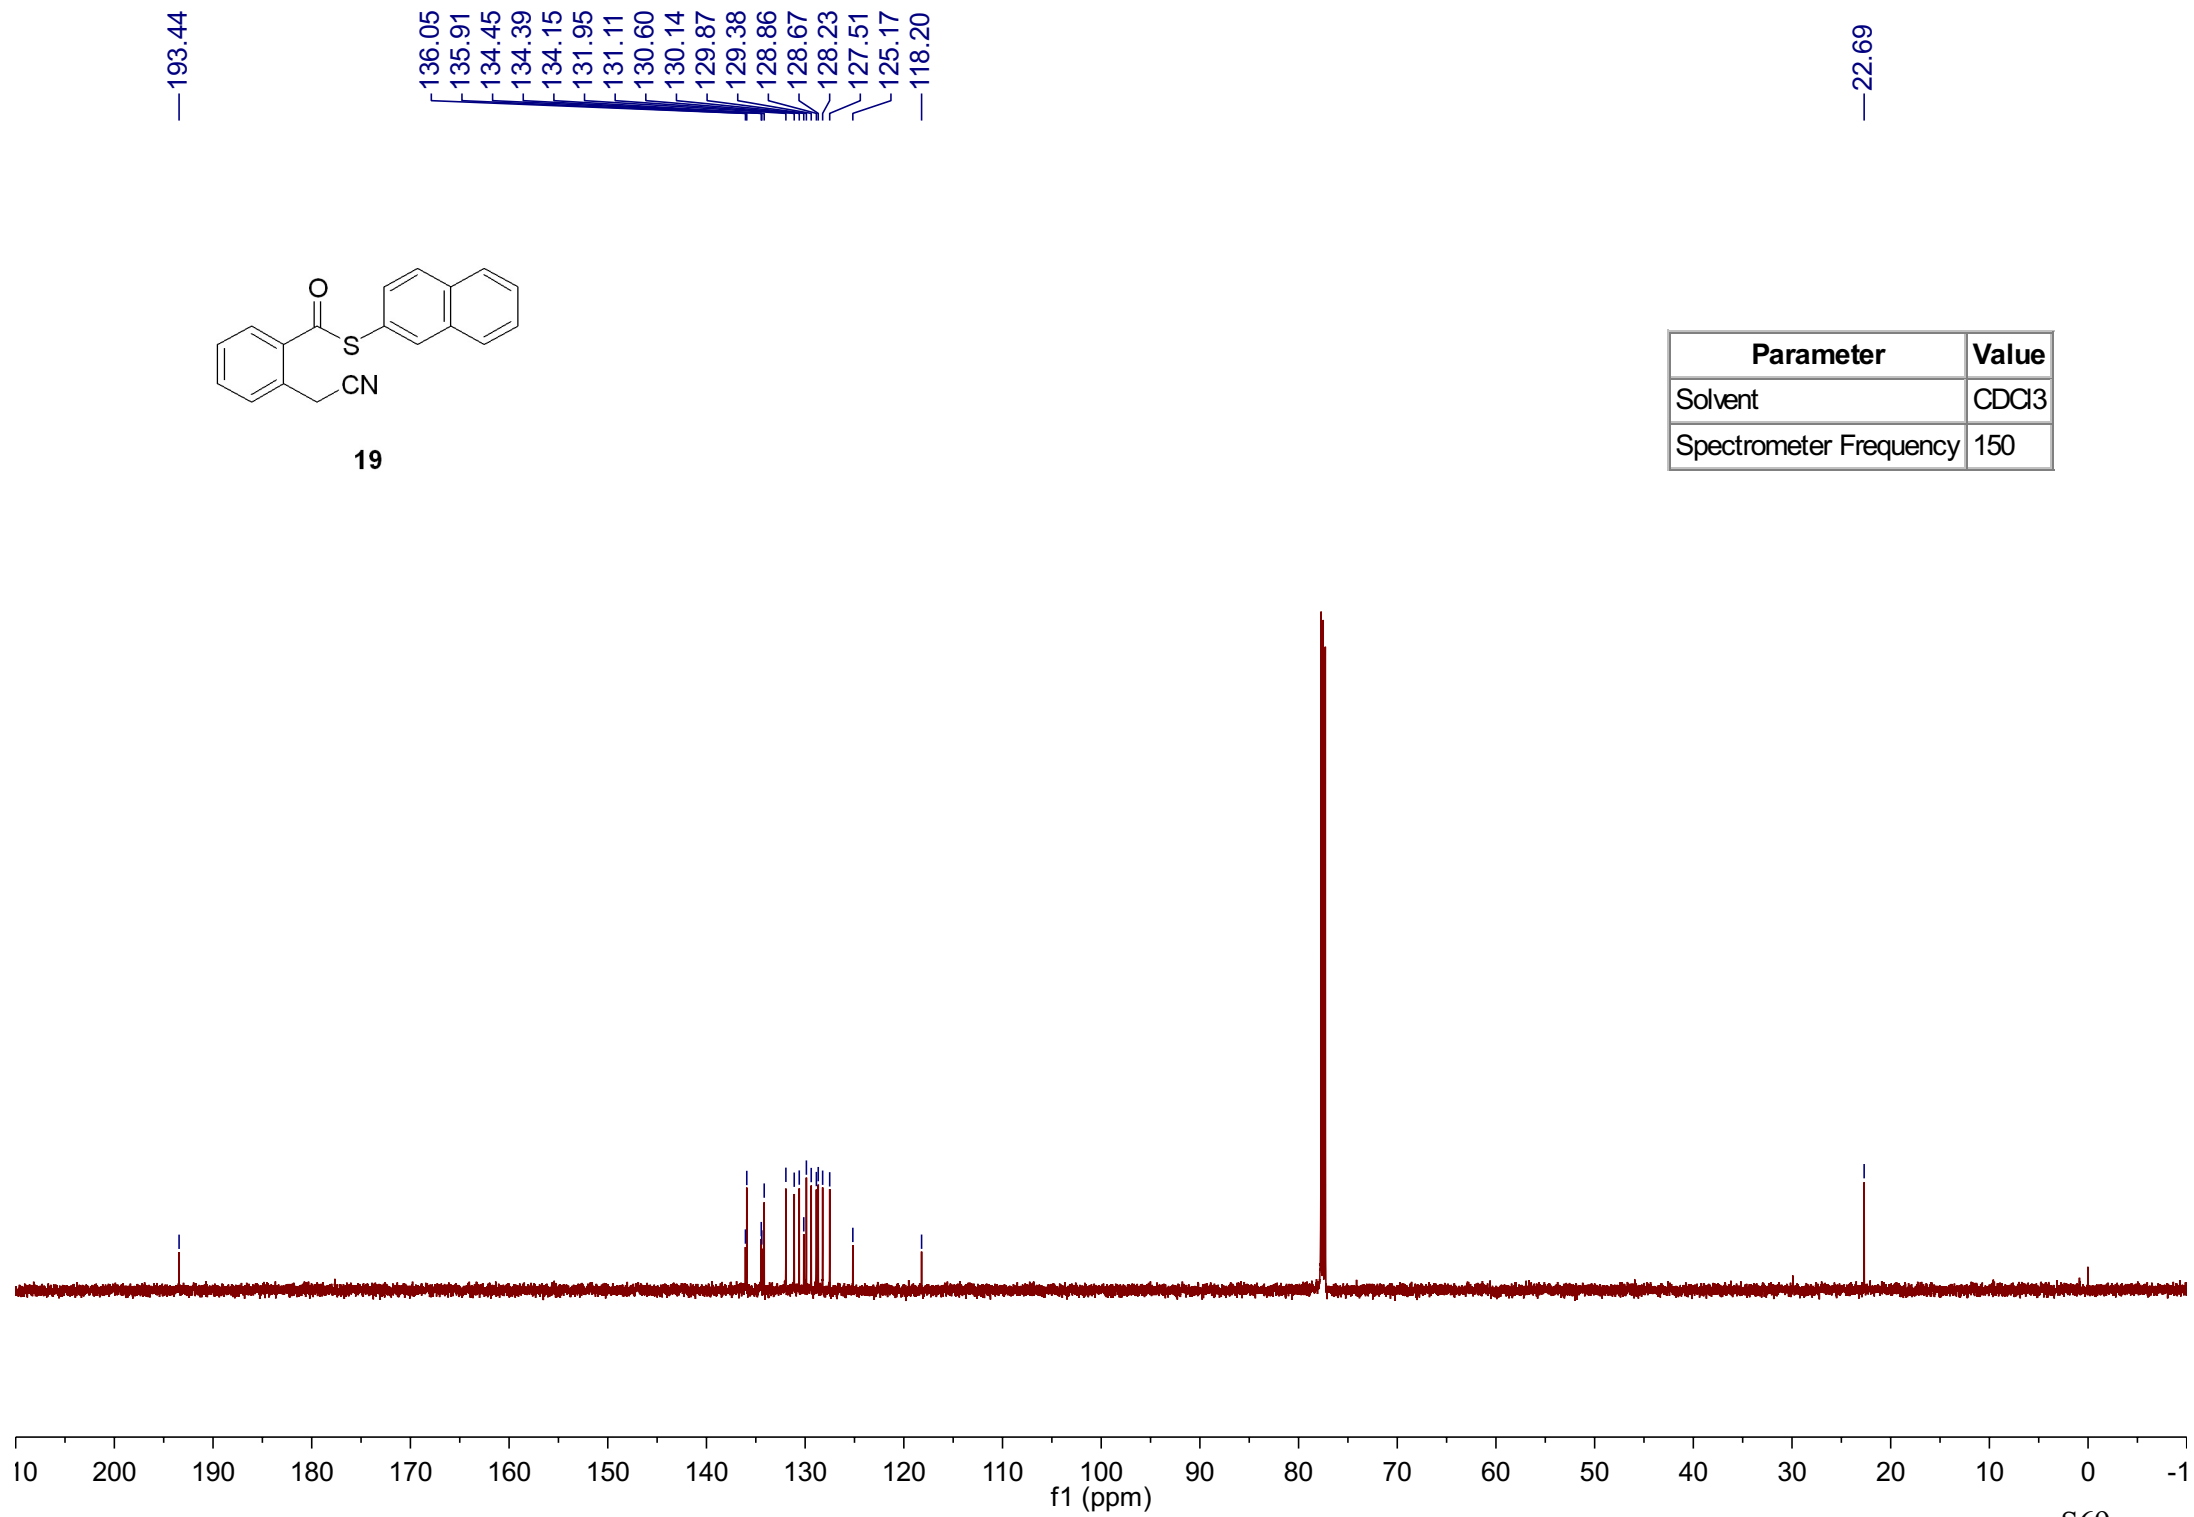

7.92  
7.49  
7.47  
7.45  
7.42  
7.41  
7.26

3.98

2.47

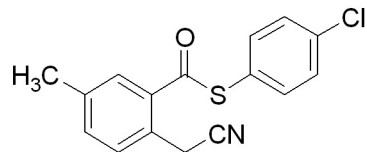

20

| Parameter              | Value             |
|------------------------|-------------------|
| Solvent                | CDCl <sub>3</sub> |
| Spectrometer Frequency | 600               |

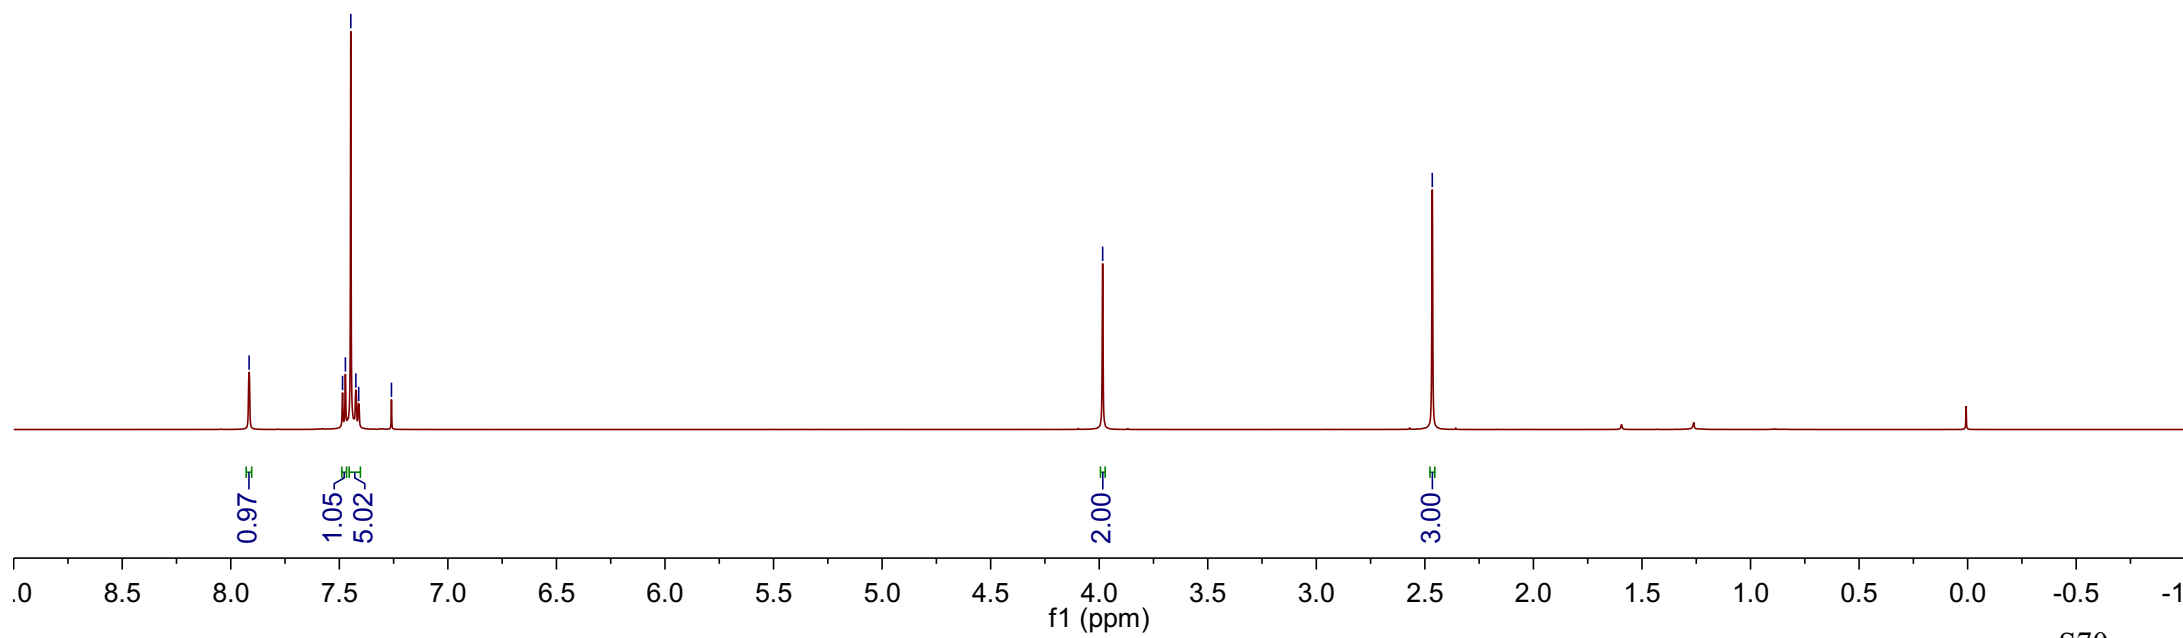

—192.26

139.27  
136.80  
136.72  
135.20  
134.55  
130.79  
130.71  
130.09  
126.79  
126.12  
—117.93

21.95  
20.83

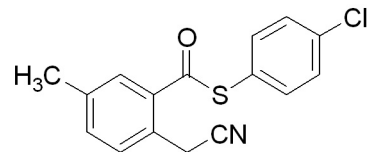

20

| Parameter              | Value             |
|------------------------|-------------------|
| Solvent                | CDCl <sub>3</sub> |
| Spectrometer Frequency | 150               |

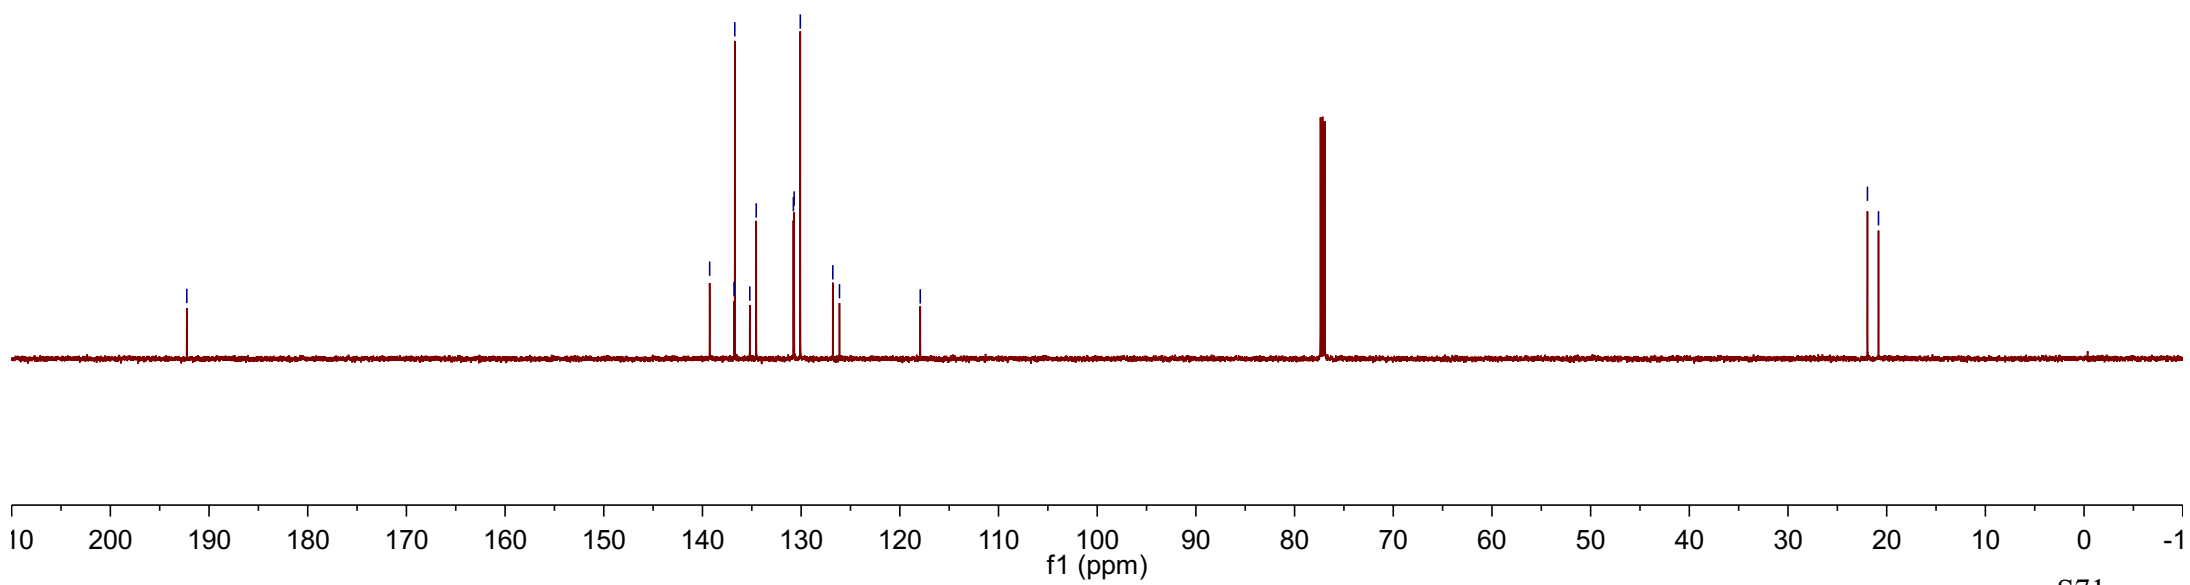

7.61  
7.60  
7.49  
7.48  
7.45  
7.26  
7.12  
7.12  
7.11  
7.11

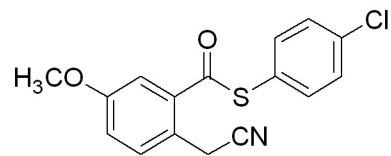

21

| Parameter              | Value |
|------------------------|-------|
| Solvent                | CDCl3 |
| Spectrometer Frequency | 600   |

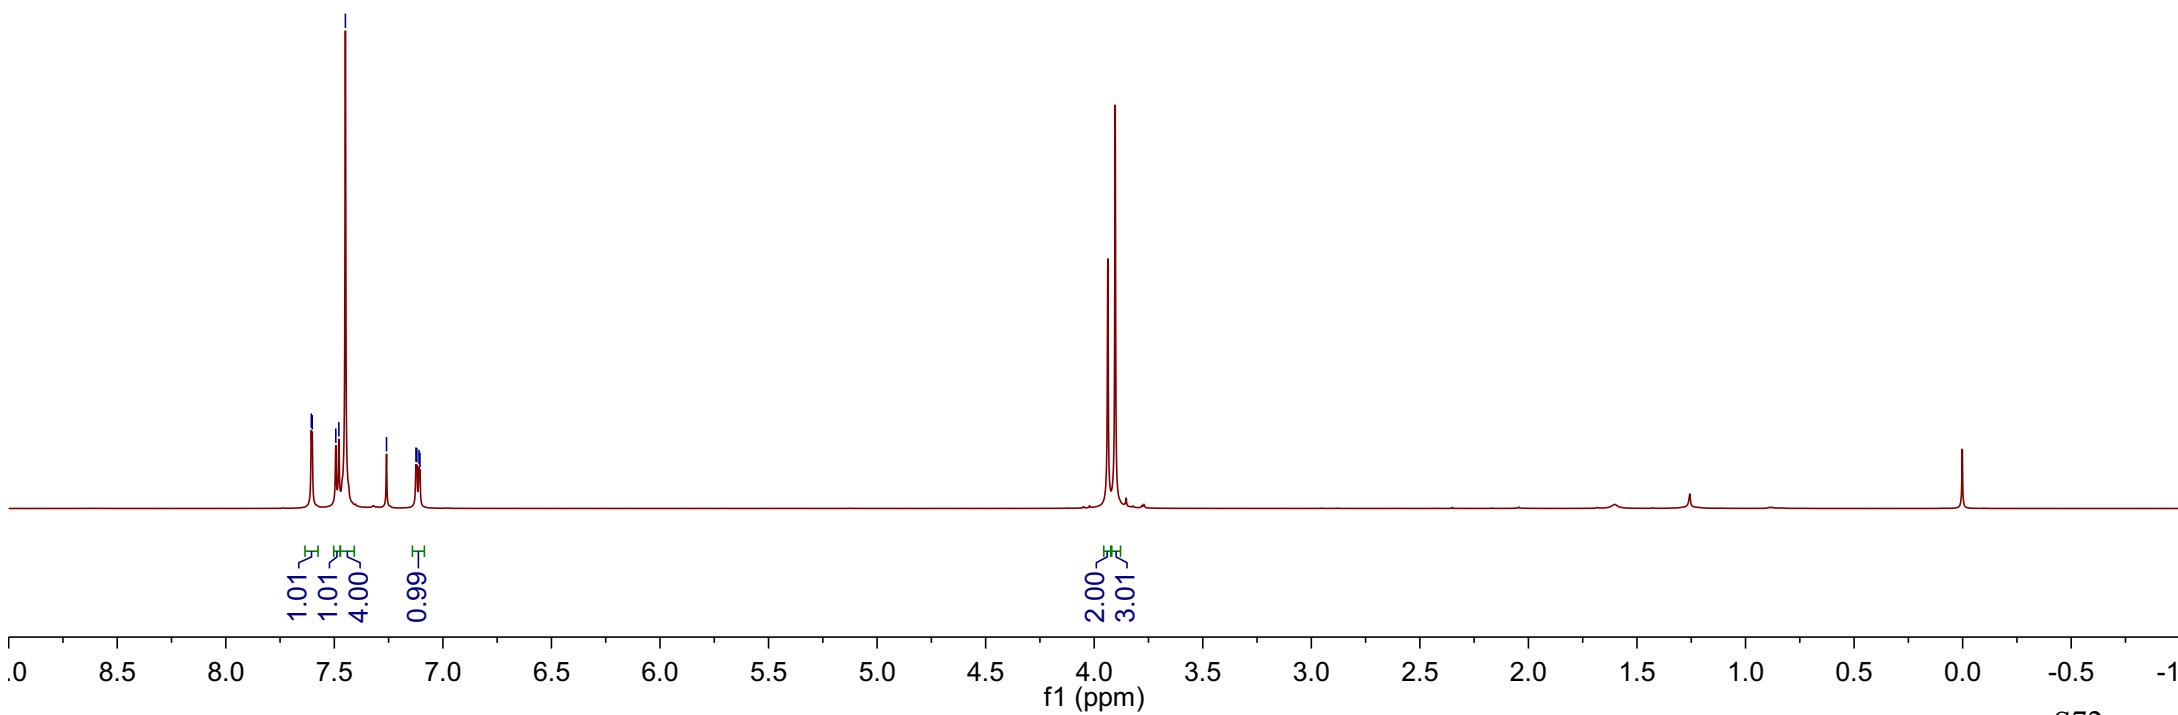





21

—192.13

—160.03

136.90  
136.70  
136.41  
132.14  
130.14  
125.97  
121.33  
118.63  
118.07  
115.87

—55.73

—21.50

| Parameter              | Value             |
|------------------------|-------------------|
| Solvent                | CDCl <sub>3</sub> |
| Spectrometer Frequency | 150               |

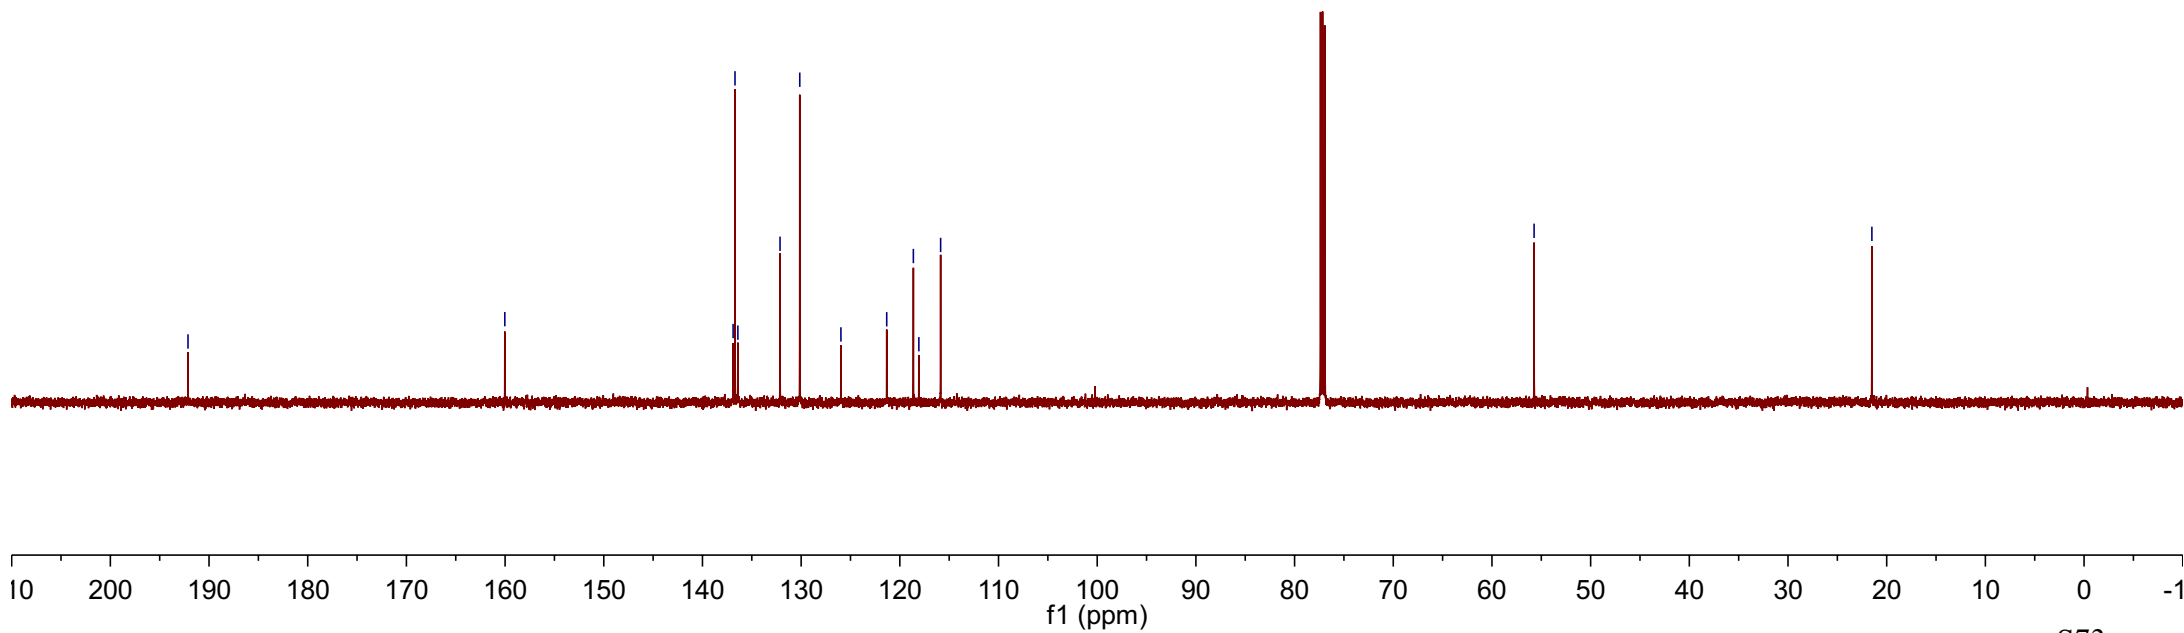

7.61  
7.45  
7.45  
7.44  
7.43  
7.42  
7.42  
7.26  
7.05

4.03  
4.00  
3.99

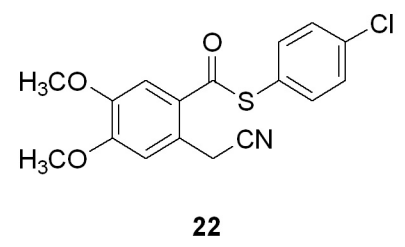

| Parameter              | Value |
|------------------------|-------|
| Solvent                | CDCl3 |
| Spectrometer Frequency | 600   |

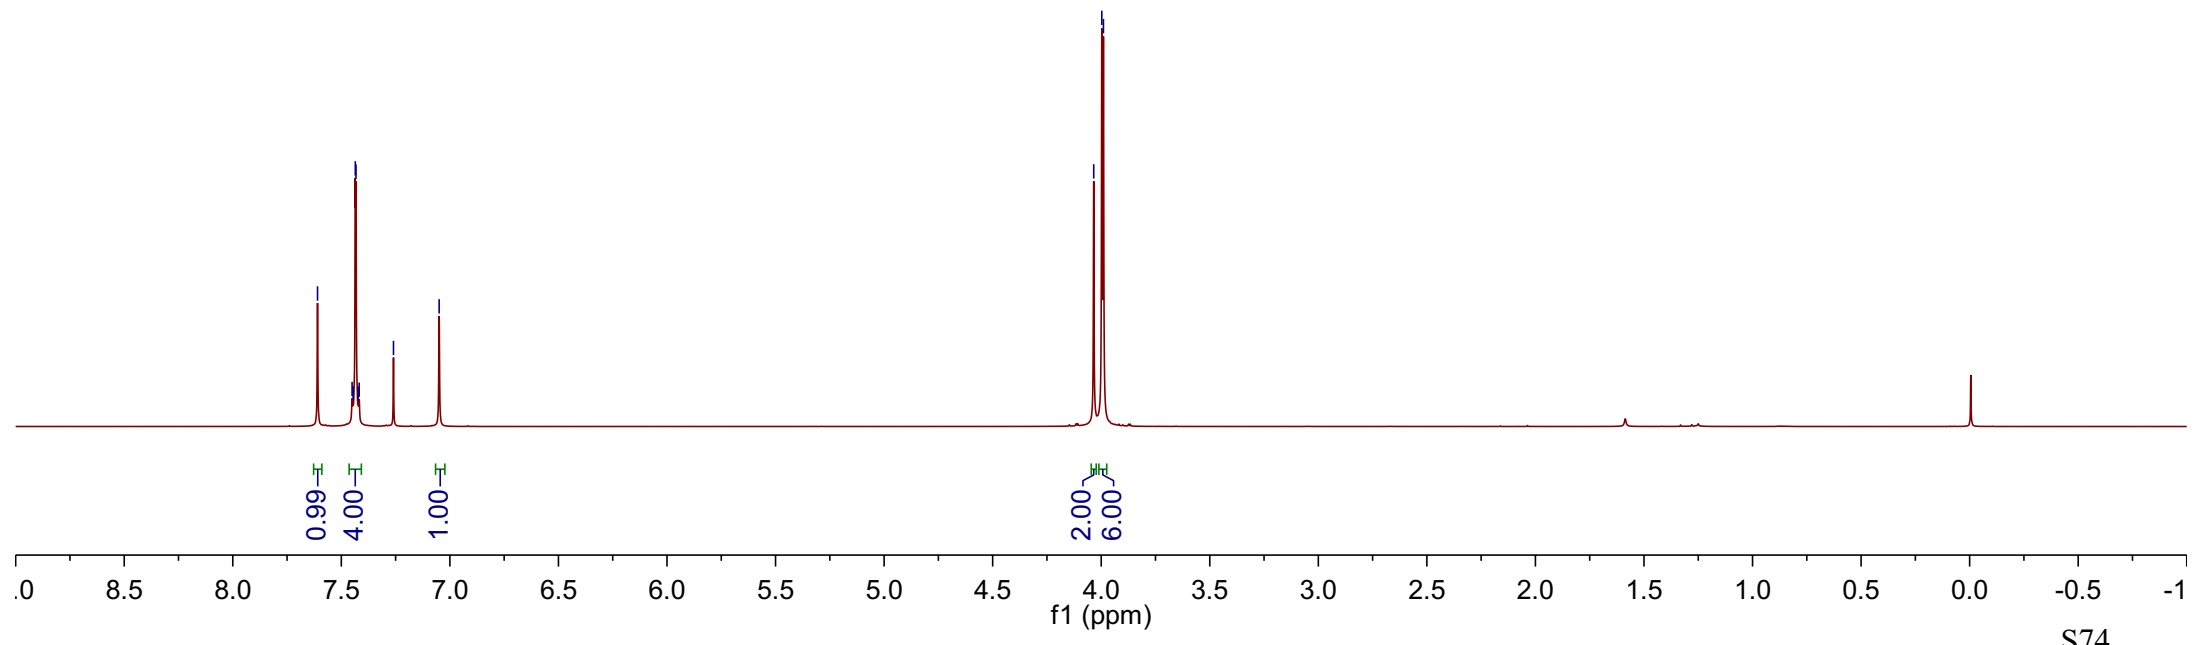

—190.56

—153.64

—148.88

—136.86

—136.83

—130.12

—127.12

—126.22

—124.26

—118.13

—113.11

—112.87

—56.35

—22.18

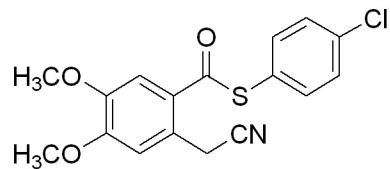

22

| Parameter              | Value |
|------------------------|-------|
| Solvent                | CDCl3 |
| Spectrometer Frequency | 150   |

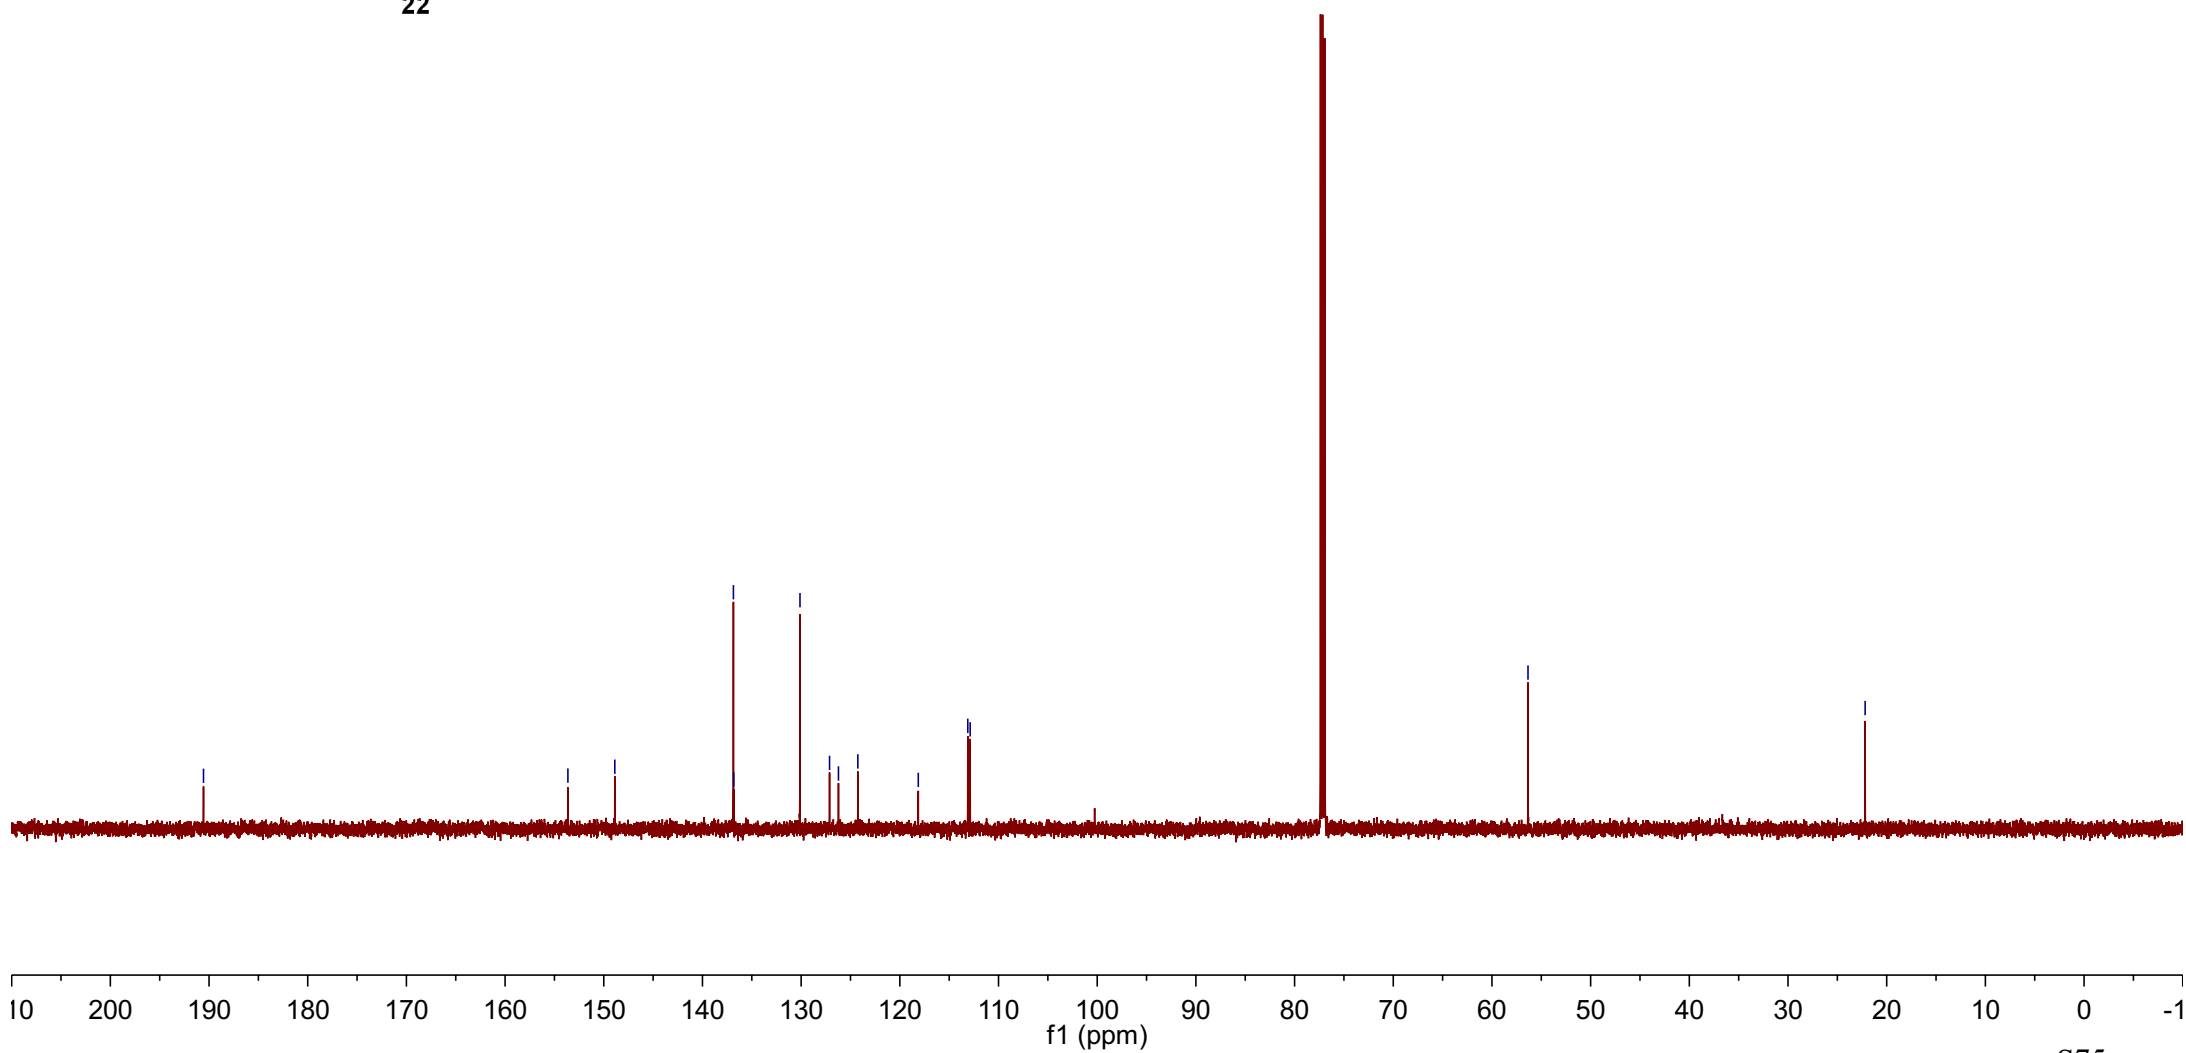

8.07  
8.06  
7.62  
7.62  
7.50  
7.49  
7.48  
7.48  
7.46  
7.46  
7.45  
7.45  
7.44  
7.43  
7.43  
7.42  
7.26

4.03

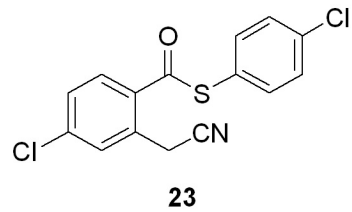

| Parameter              | Value             |
|------------------------|-------------------|
| Solvent                | CDCl <sub>3</sub> |
| Spectrometer Frequency | 600               |

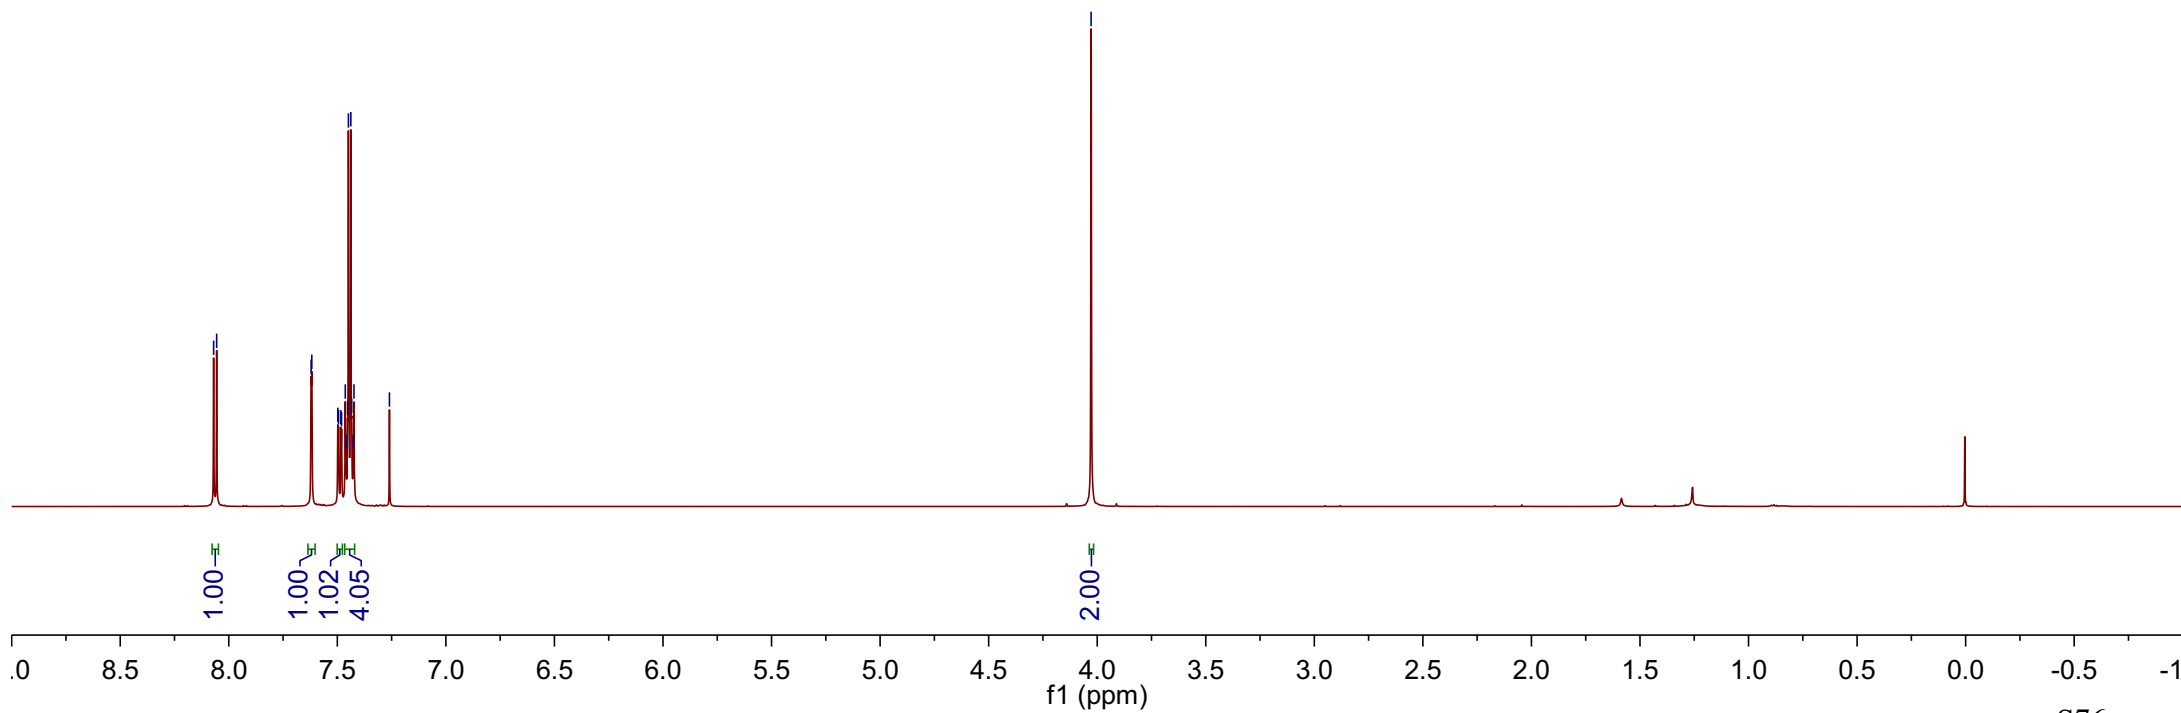

—191.35

140.37  
137.06  
136.69  
133.59  
131.84  
131.44  
131.04  
130.19  
129.23  
125.53  
—117.08

—22.18

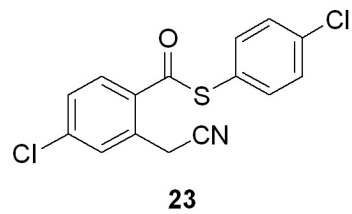

| Parameter              | Value             |
|------------------------|-------------------|
| Solvent                | CDCl <sub>3</sub> |
| Spectrometer Frequency | 150               |

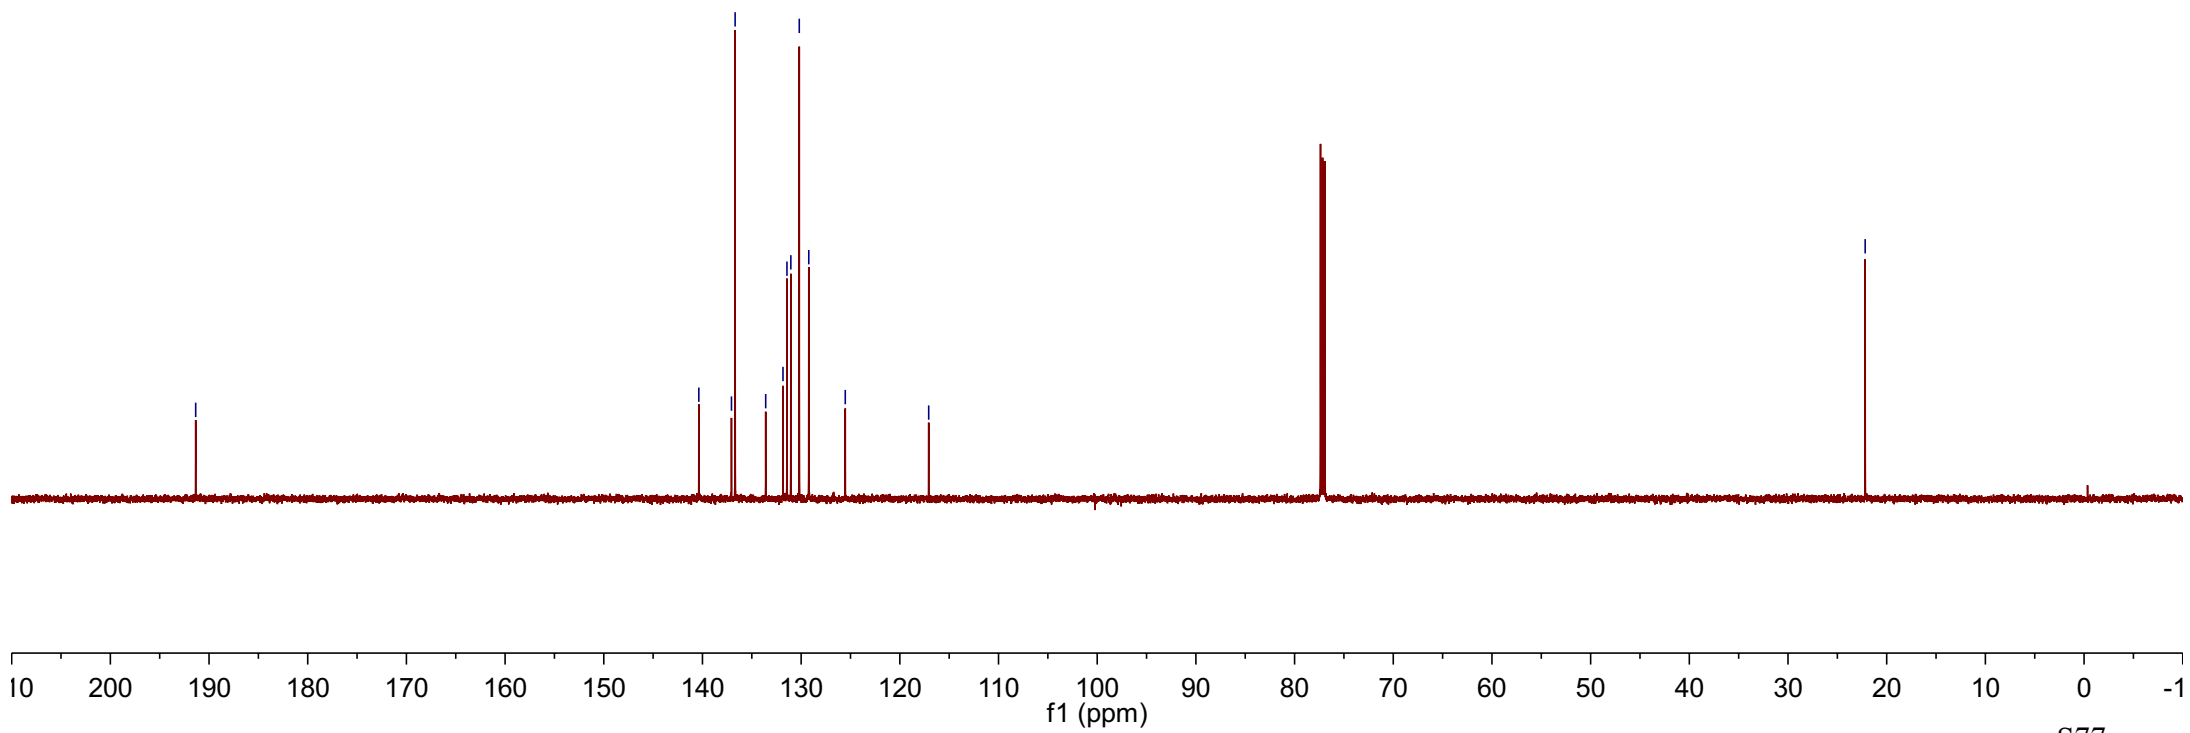

7.99  
7.99  
7.98  
7.98  
7.85  
7.85  
7.84  
7.84  
7.48  
7.48  
7.48  
7.47  
7.46  
7.45  
7.45  
7.40  
7.38  
7.37  
7.26

—4.15

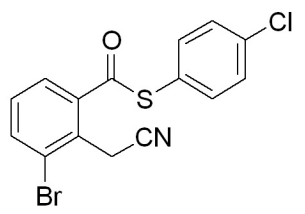

24

| Parameter              | Value |
|------------------------|-------|
| Solvent                | CDCl3 |
| Spectrometer Frequency | 600   |

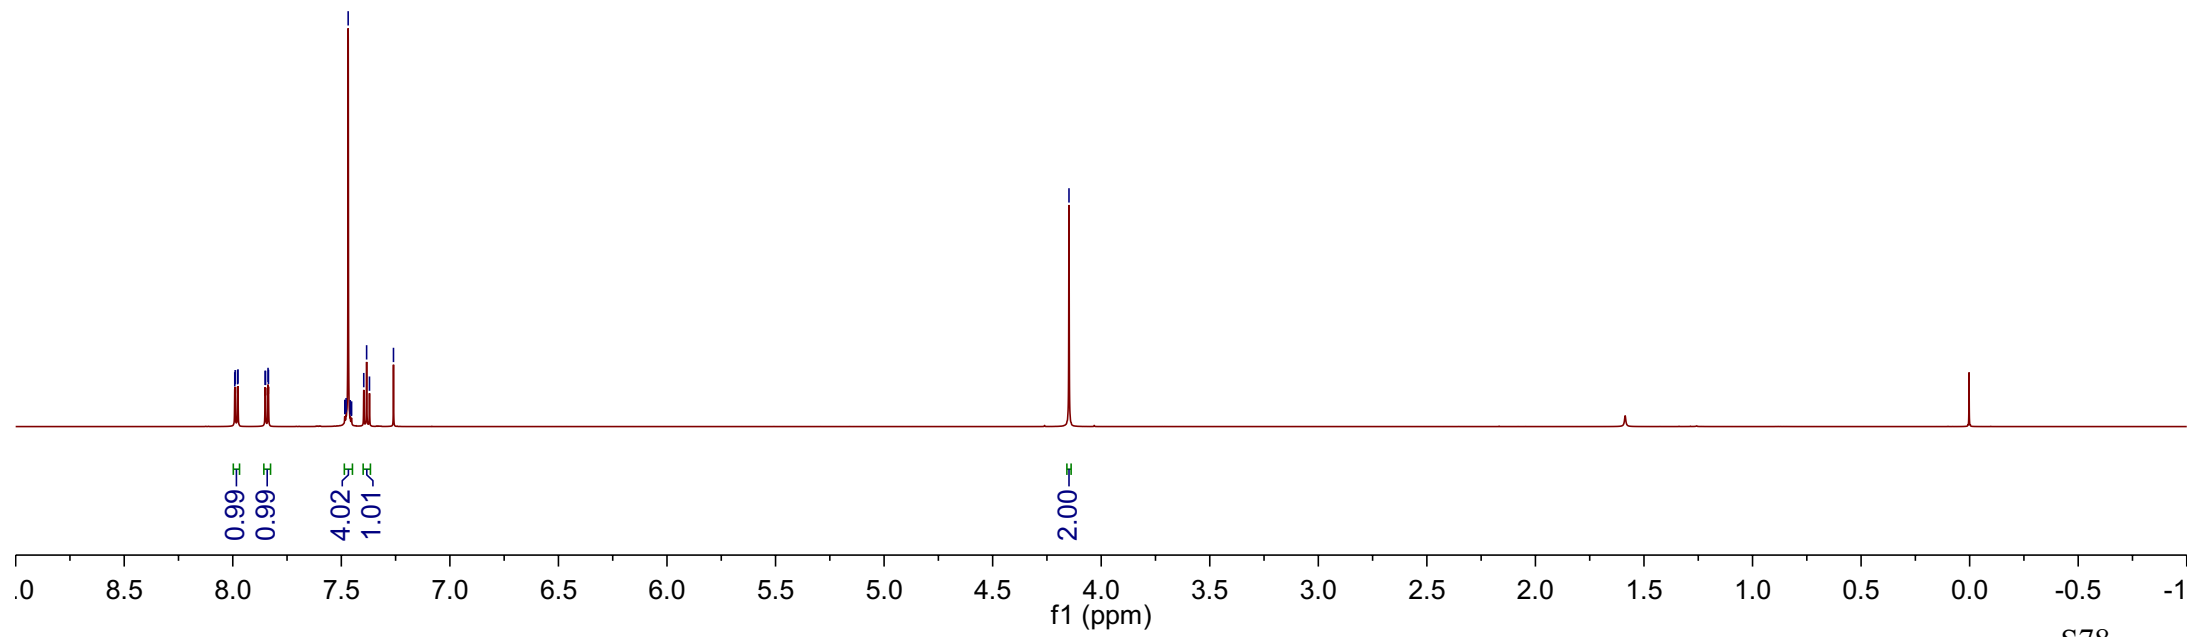

—192.29

138.88  
137.70  
137.13  
136.61  
130.42  
130.24  
129.14  
128.81  
127.80  
125.60  
—116.41

—21.57

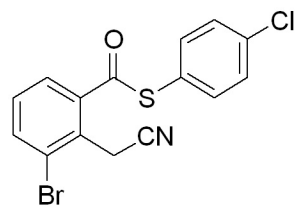

24

| Parameter              | Value             |
|------------------------|-------------------|
| Solvent                | CDCl <sub>3</sub> |
| Spectrometer Frequency | 150               |

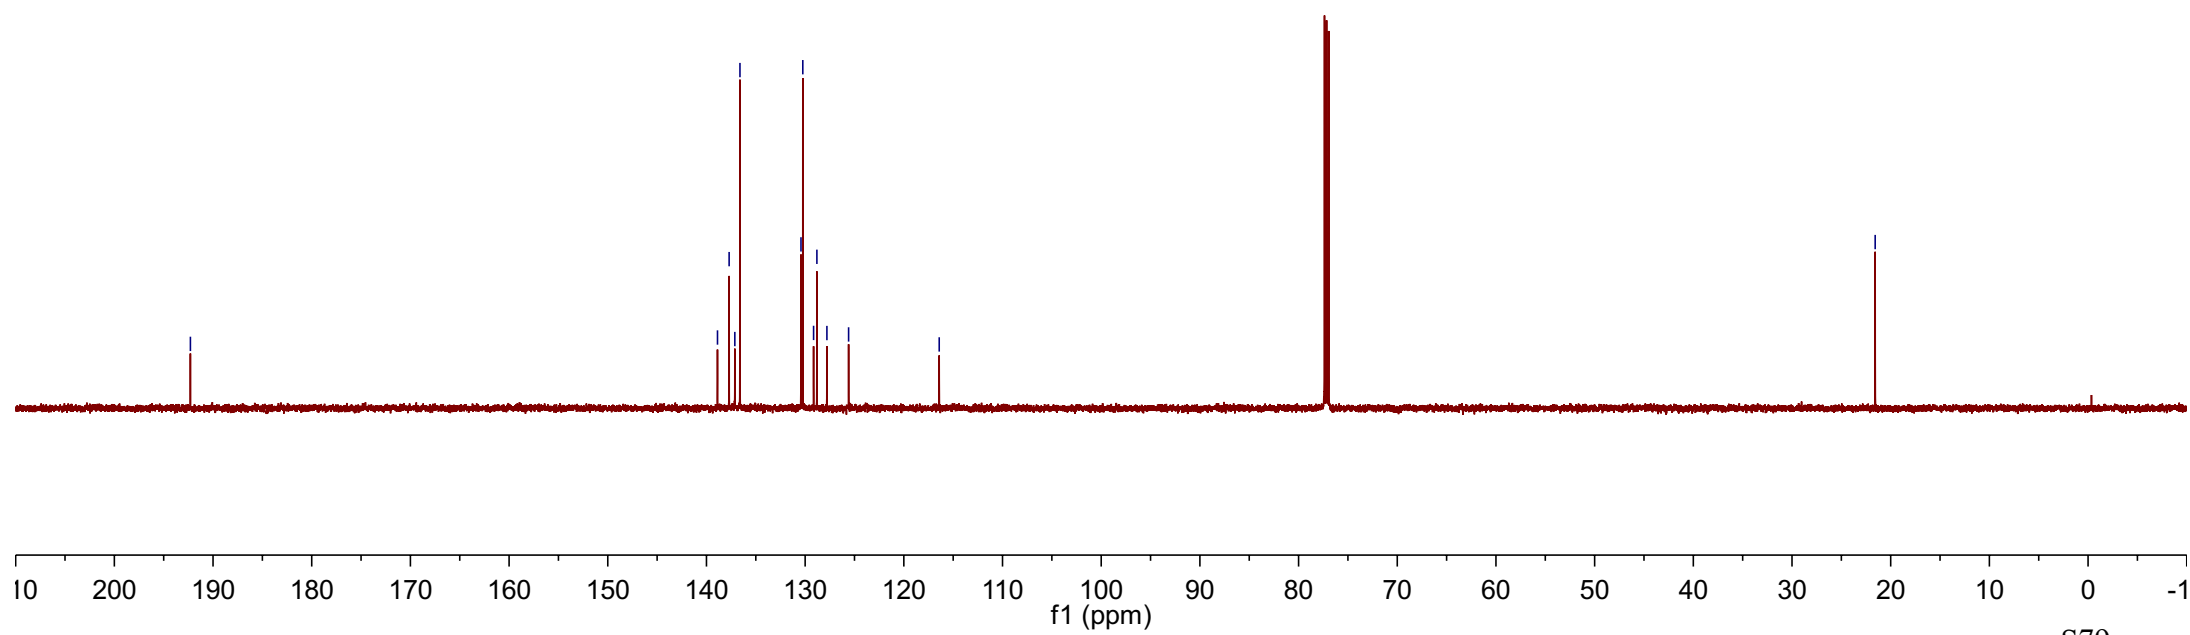

7.99  
7.97  
7.78  
7.78  
7.66  
7.66  
7.65  
7.65  
7.47  
7.46  
7.45  
7.45  
7.44  
7.43  
7.43  
7.42  
7.26

4.02

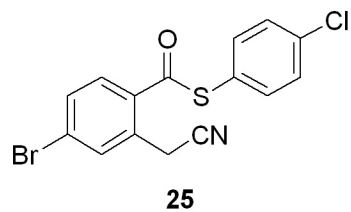

| Parameter              | Value             |
|------------------------|-------------------|
| Solvent                | CDCl <sub>3</sub> |
| Spectrometer Frequency | 600               |

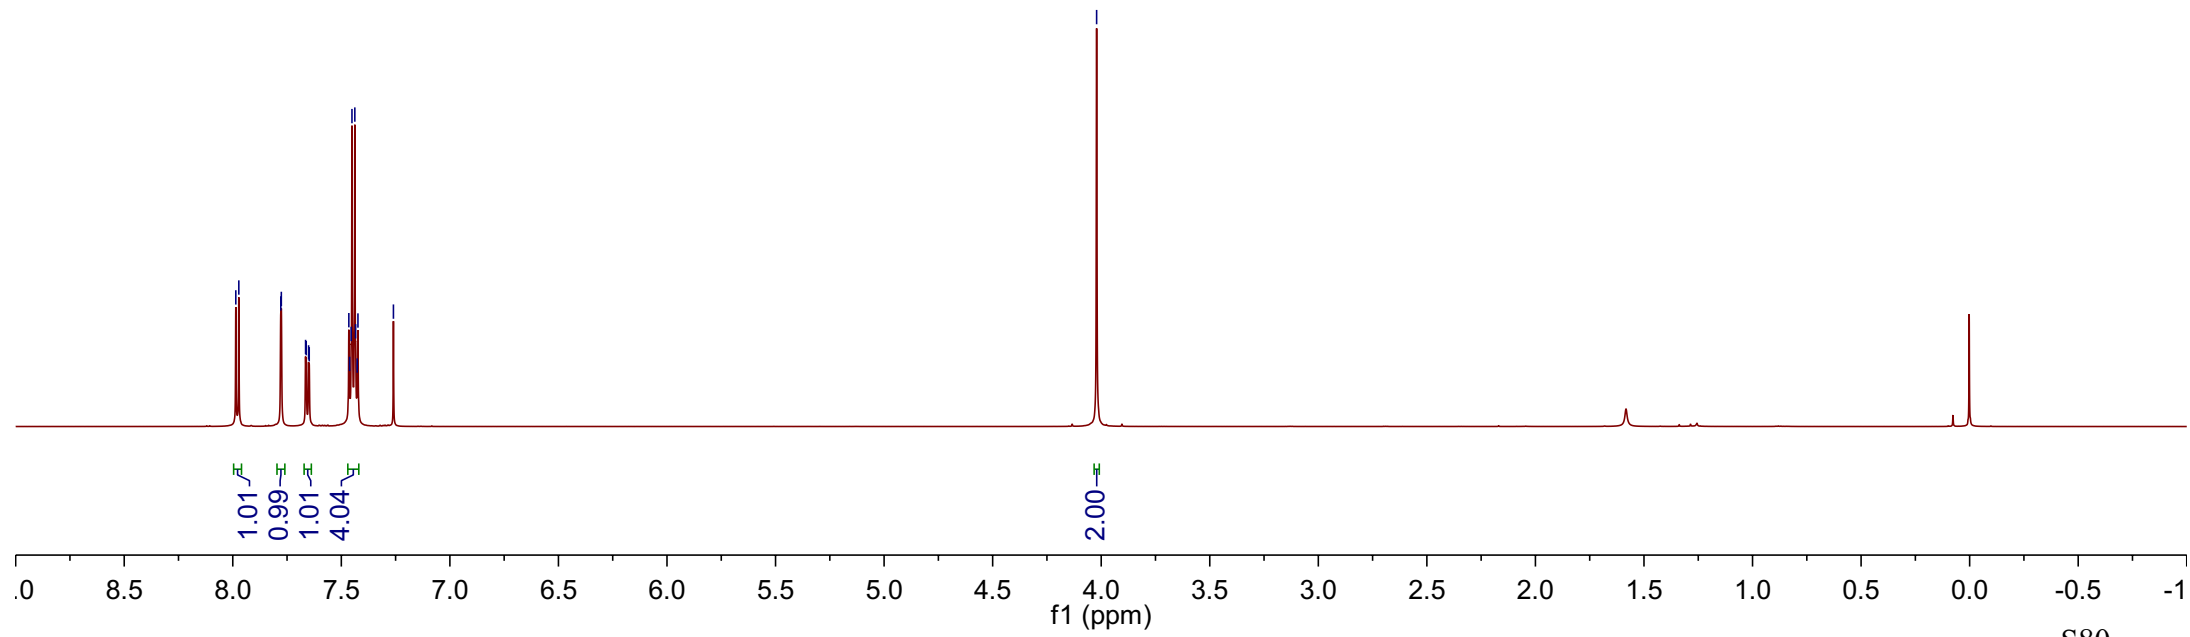



—191.57

137.10  
136.69  
134.09  
133.98  
132.31  
131.80  
131.41  
130.22  
128.80  
125.49  
—117.08

—22.08



| Parameter              | Value             |
|------------------------|-------------------|
| Solvent                | CDCl <sub>3</sub> |
| Spectrometer Frequency | 150               |

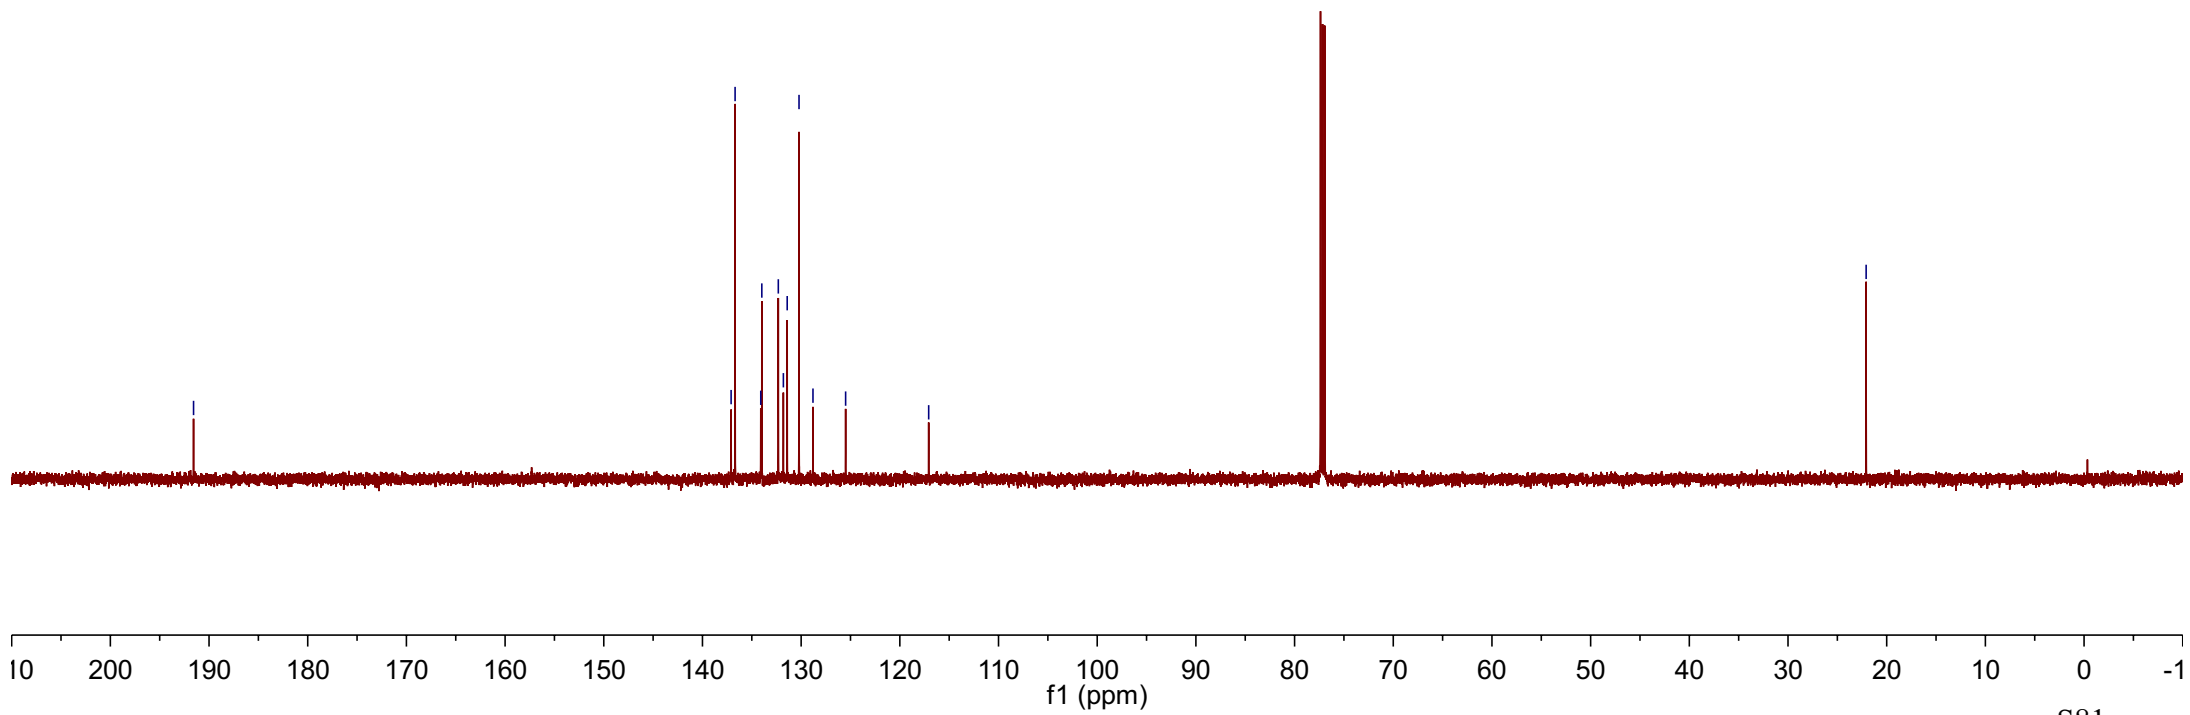

8.21  
8.20  
7.75  
7.74  
7.73  
7.73  
7.49  
7.48  
7.47  
7.47  
7.46  
7.45  
7.44  
7.43  
7.43  
7.26

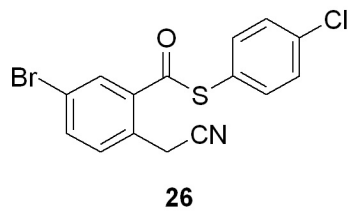

| Parameter              | Value             |
|------------------------|-------------------|
| Solvent                | CDCl <sub>3</sub> |
| Spectrometer Frequency | 600               |

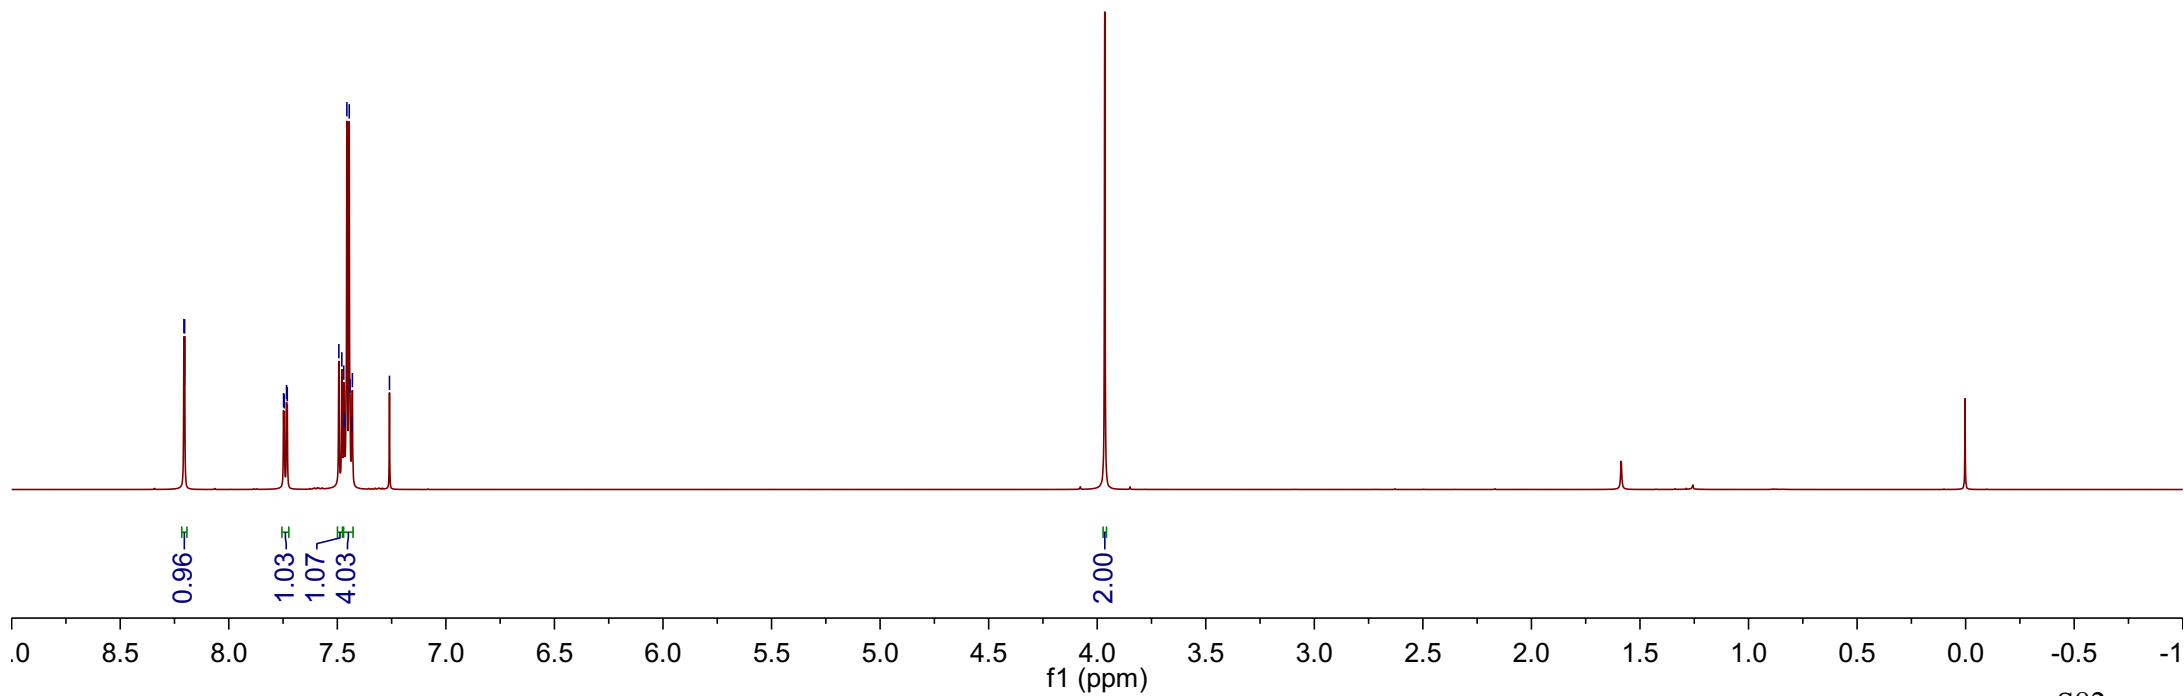

—191.24

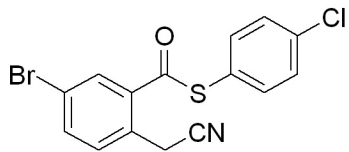

26

137.16  
137.08  
136.70  
136.63  
132.84  
132.35  
130.25  
128.63  
125.35  
122.84  
117.18

—21.91

| Parameter              | Value |
|------------------------|-------|
| Solvent                | CDCl3 |
| Spectrometer Frequency | 150   |

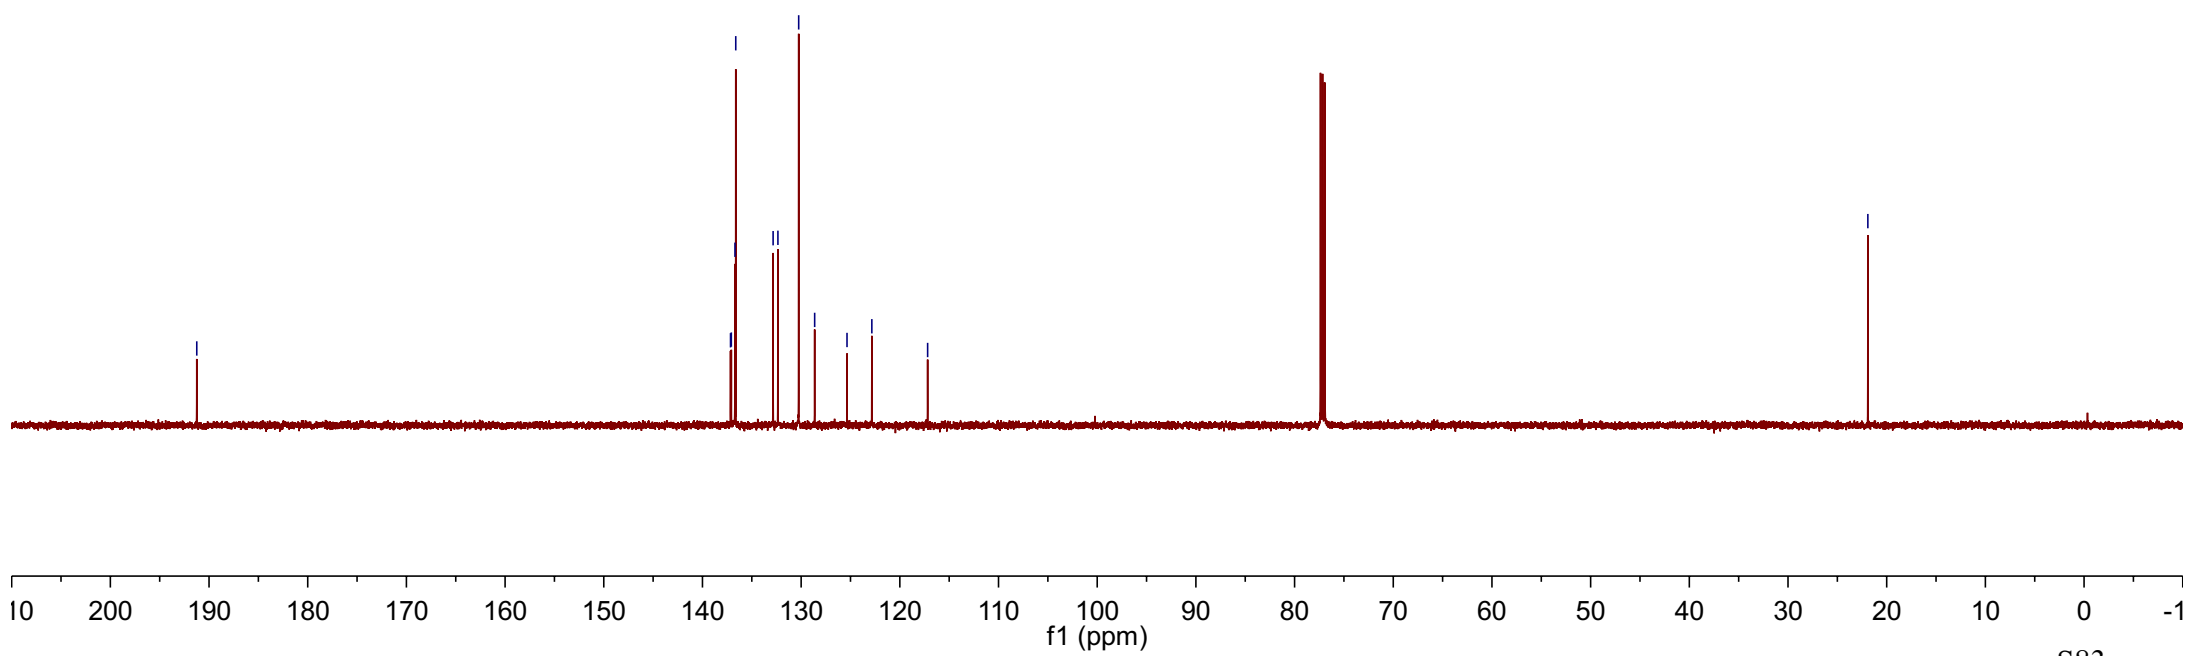

8.20  
8.18  
7.94  
7.93  
7.67  
7.66  
7.65  
7.51  
7.51  
7.50  
7.50  
7.48  
7.48  
7.47  
7.47  
7.26

4.10

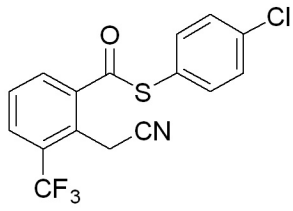

27

| Parameter              | Value             |
|------------------------|-------------------|
| Solvent                | CDCl <sub>3</sub> |
| Spectrometer Frequency | 600               |

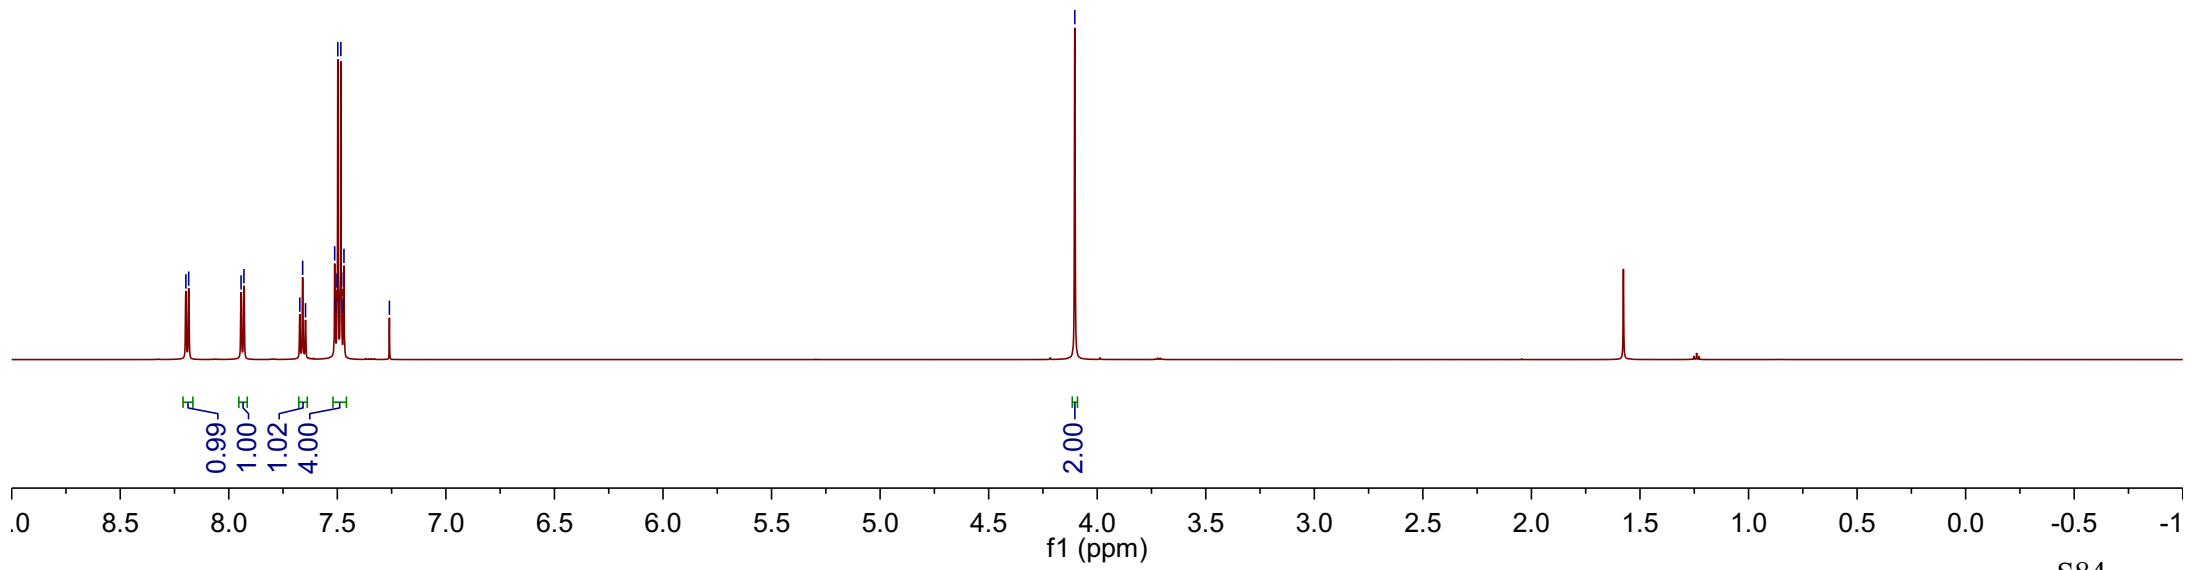

—192.62

139.35  
137.30  
136.67  
132.90  
131.74  
131.54  
131.33  
131.13  
130.59  
130.56  
130.52  
130.48  
130.33  
129.63  
128.05  
126.53  
125.33  
124.70  
122.87  
121.04  
116.44

17.61  
17.60

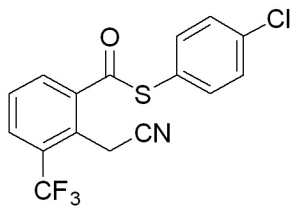

27

| Parameter              | Value |
|------------------------|-------|
| Solvent                | CDCl3 |
| Spectrometer Frequency | 150   |

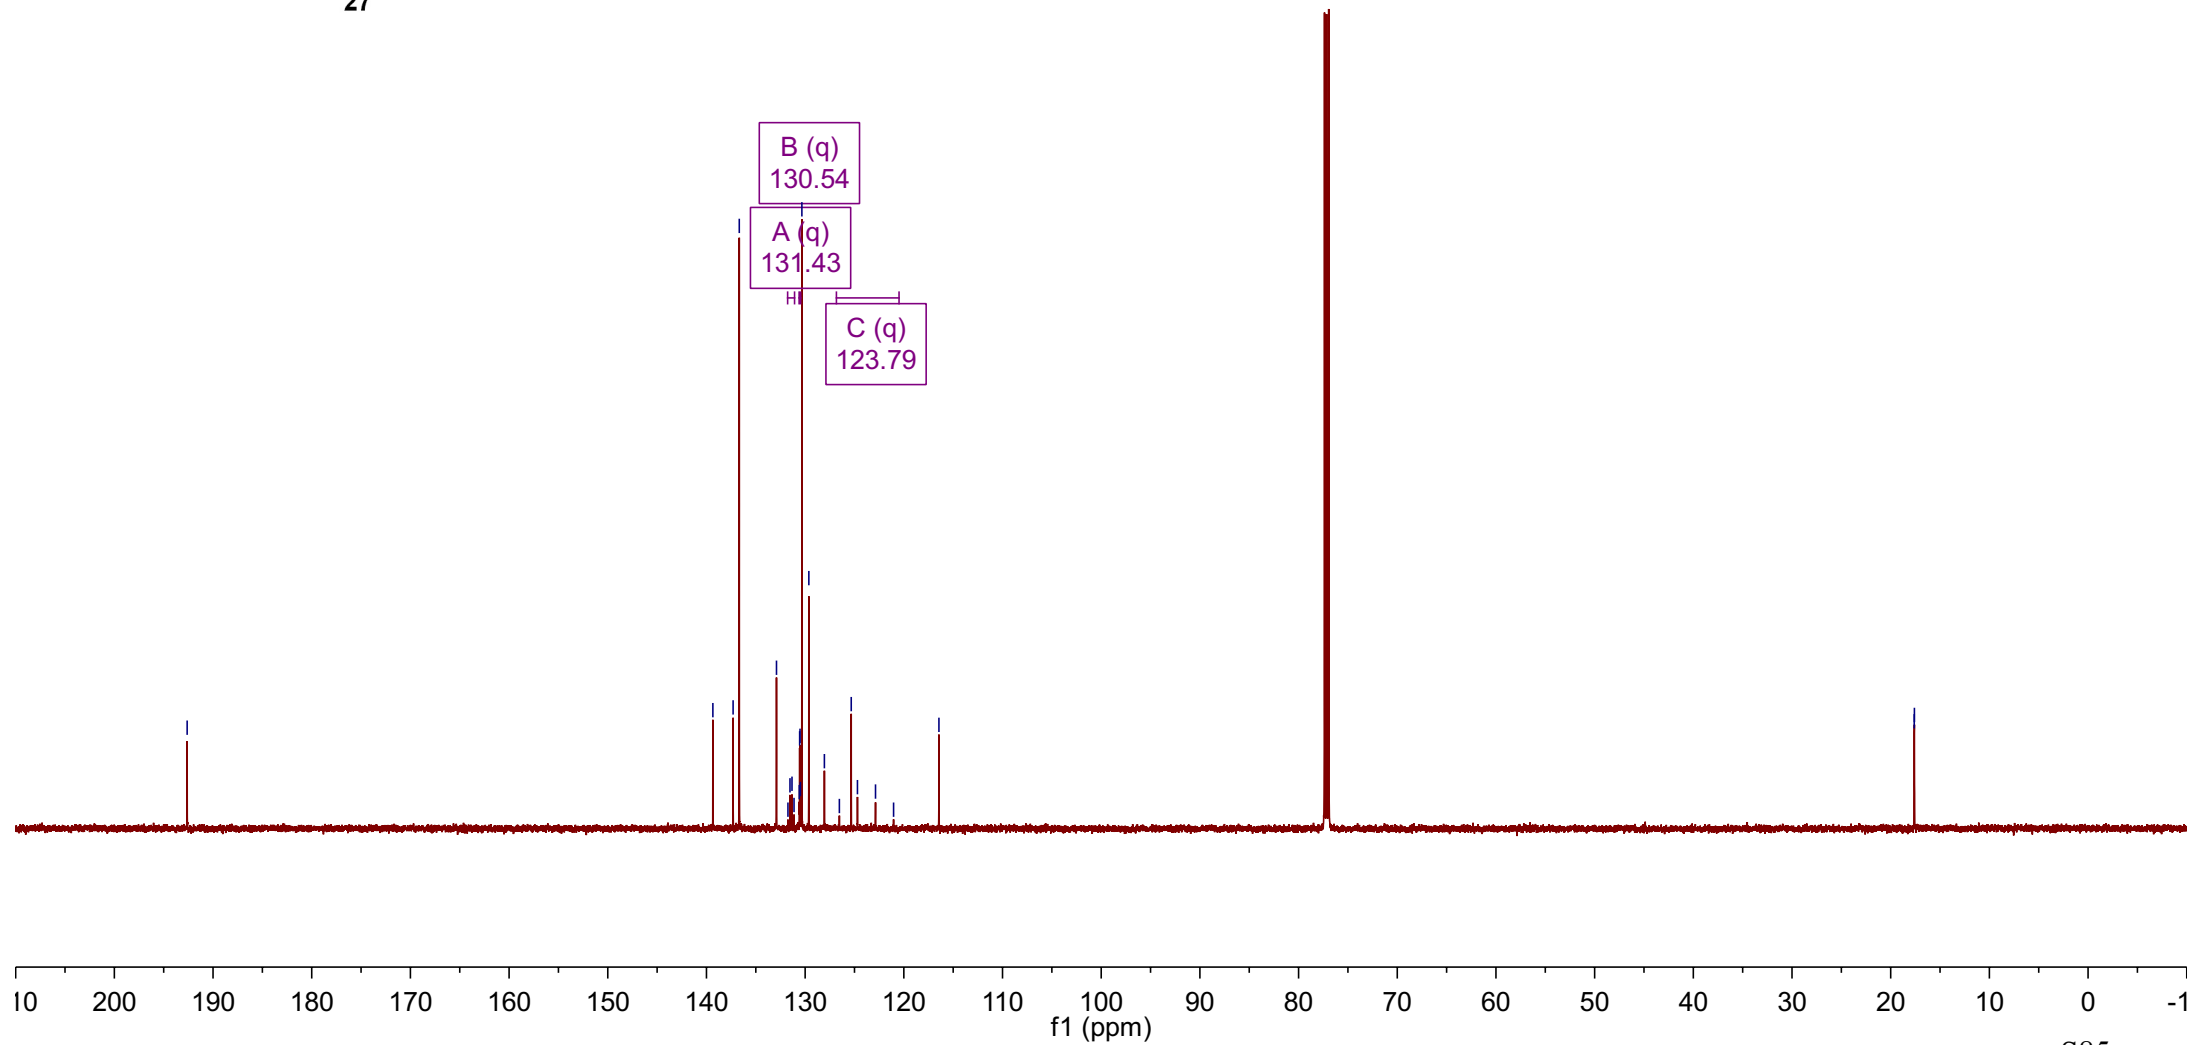

7.81  
7.80  
7.57  
7.57  
7.56  
7.56  
7.54  
7.54  
7.46  
7.46  
7.45  
7.45  
7.44  
7.44  
7.43  
7.26

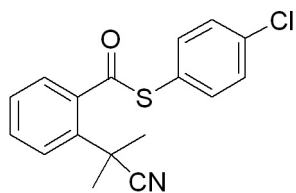

28

1.87

| Parameter              | Value             |
|------------------------|-------------------|
| Solvent                | CDCl <sub>3</sub> |
| Spectrometer Frequency | 600               |

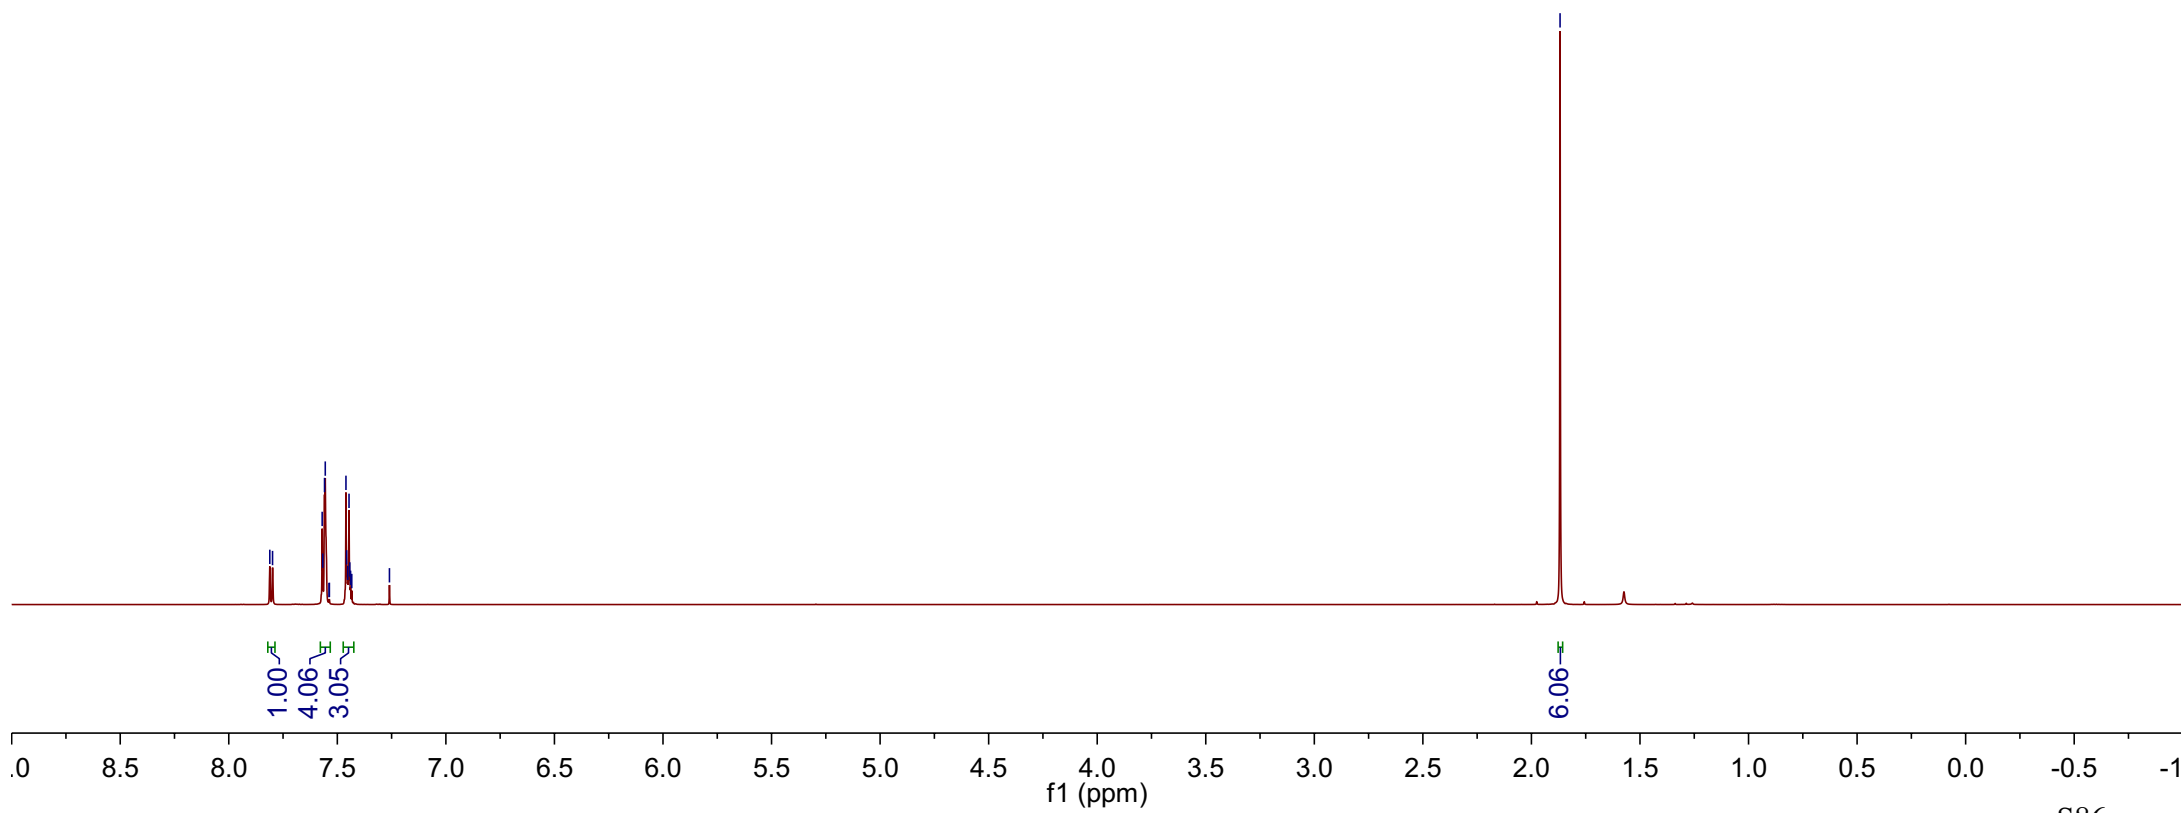

—195.10

139.20  
138.02  
136.82  
136.70  
132.57  
130.12  
129.76  
128.32  
126.90  
126.49  
124.38

—36.61

—29.51

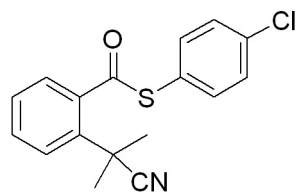

**28**

| Parameter              | Value             |
|------------------------|-------------------|
| Solvent                | CDCl <sub>3</sub> |
| Spectrometer Frequency | 150               |

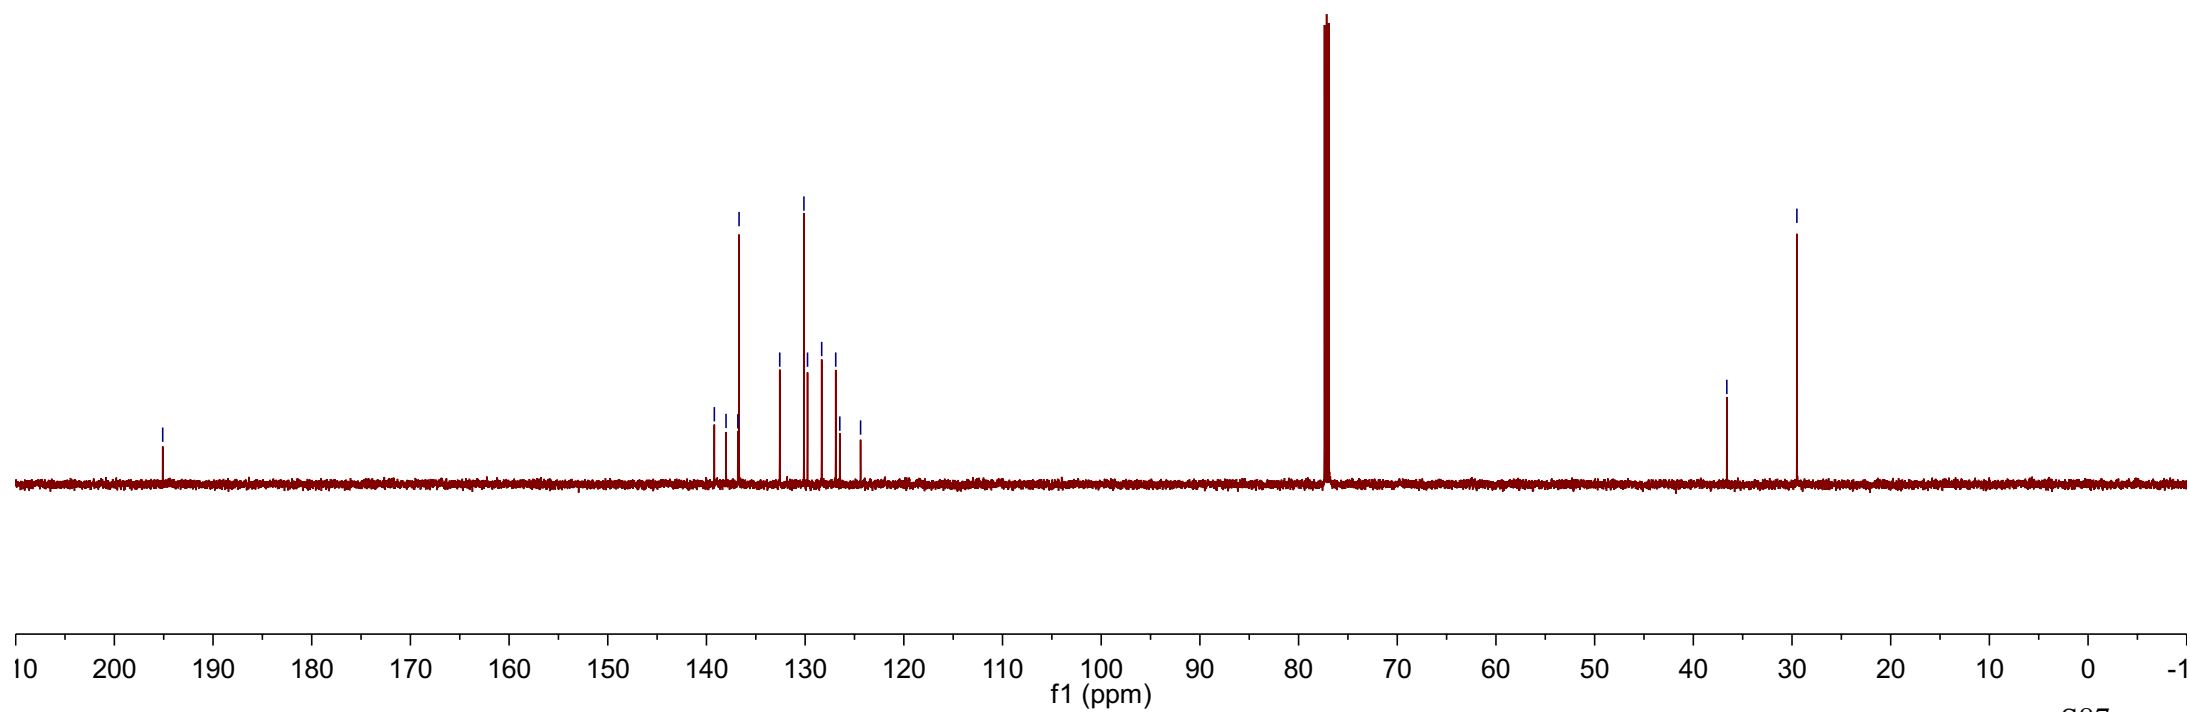

8.13  
8.11  
8.05  
8.04  
8.02  
7.95  
7.93  
7.71  
7.69  
7.65  
7.63  
7.61  
7.59  
7.57  
7.48  
7.46  
7.26

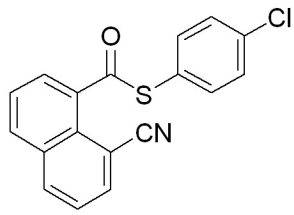

29

| Parameter              | Value |
|------------------------|-------|
| Solvent                | CDCl3 |
| Spectrometer Frequency | 400   |

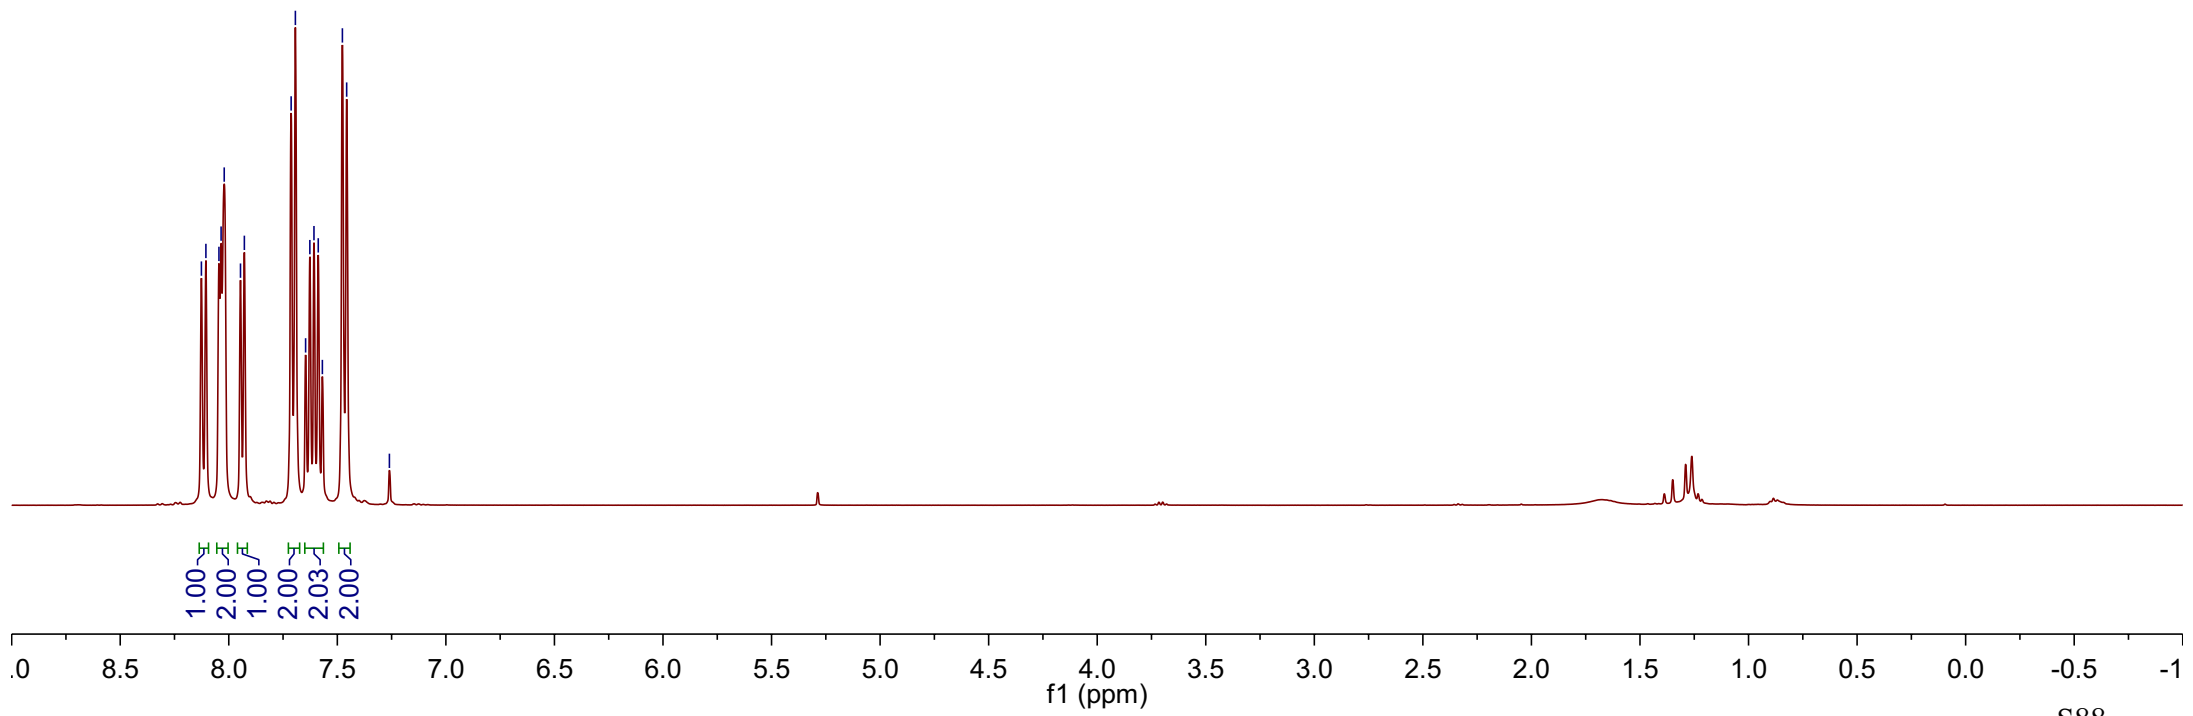



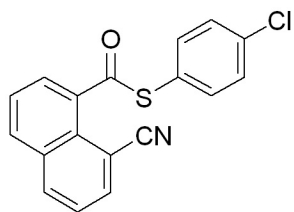

29

| Parameter              | Value |
|------------------------|-------|
| Solvent                | CDCl3 |
| Spectrometer Frequency | 100   |

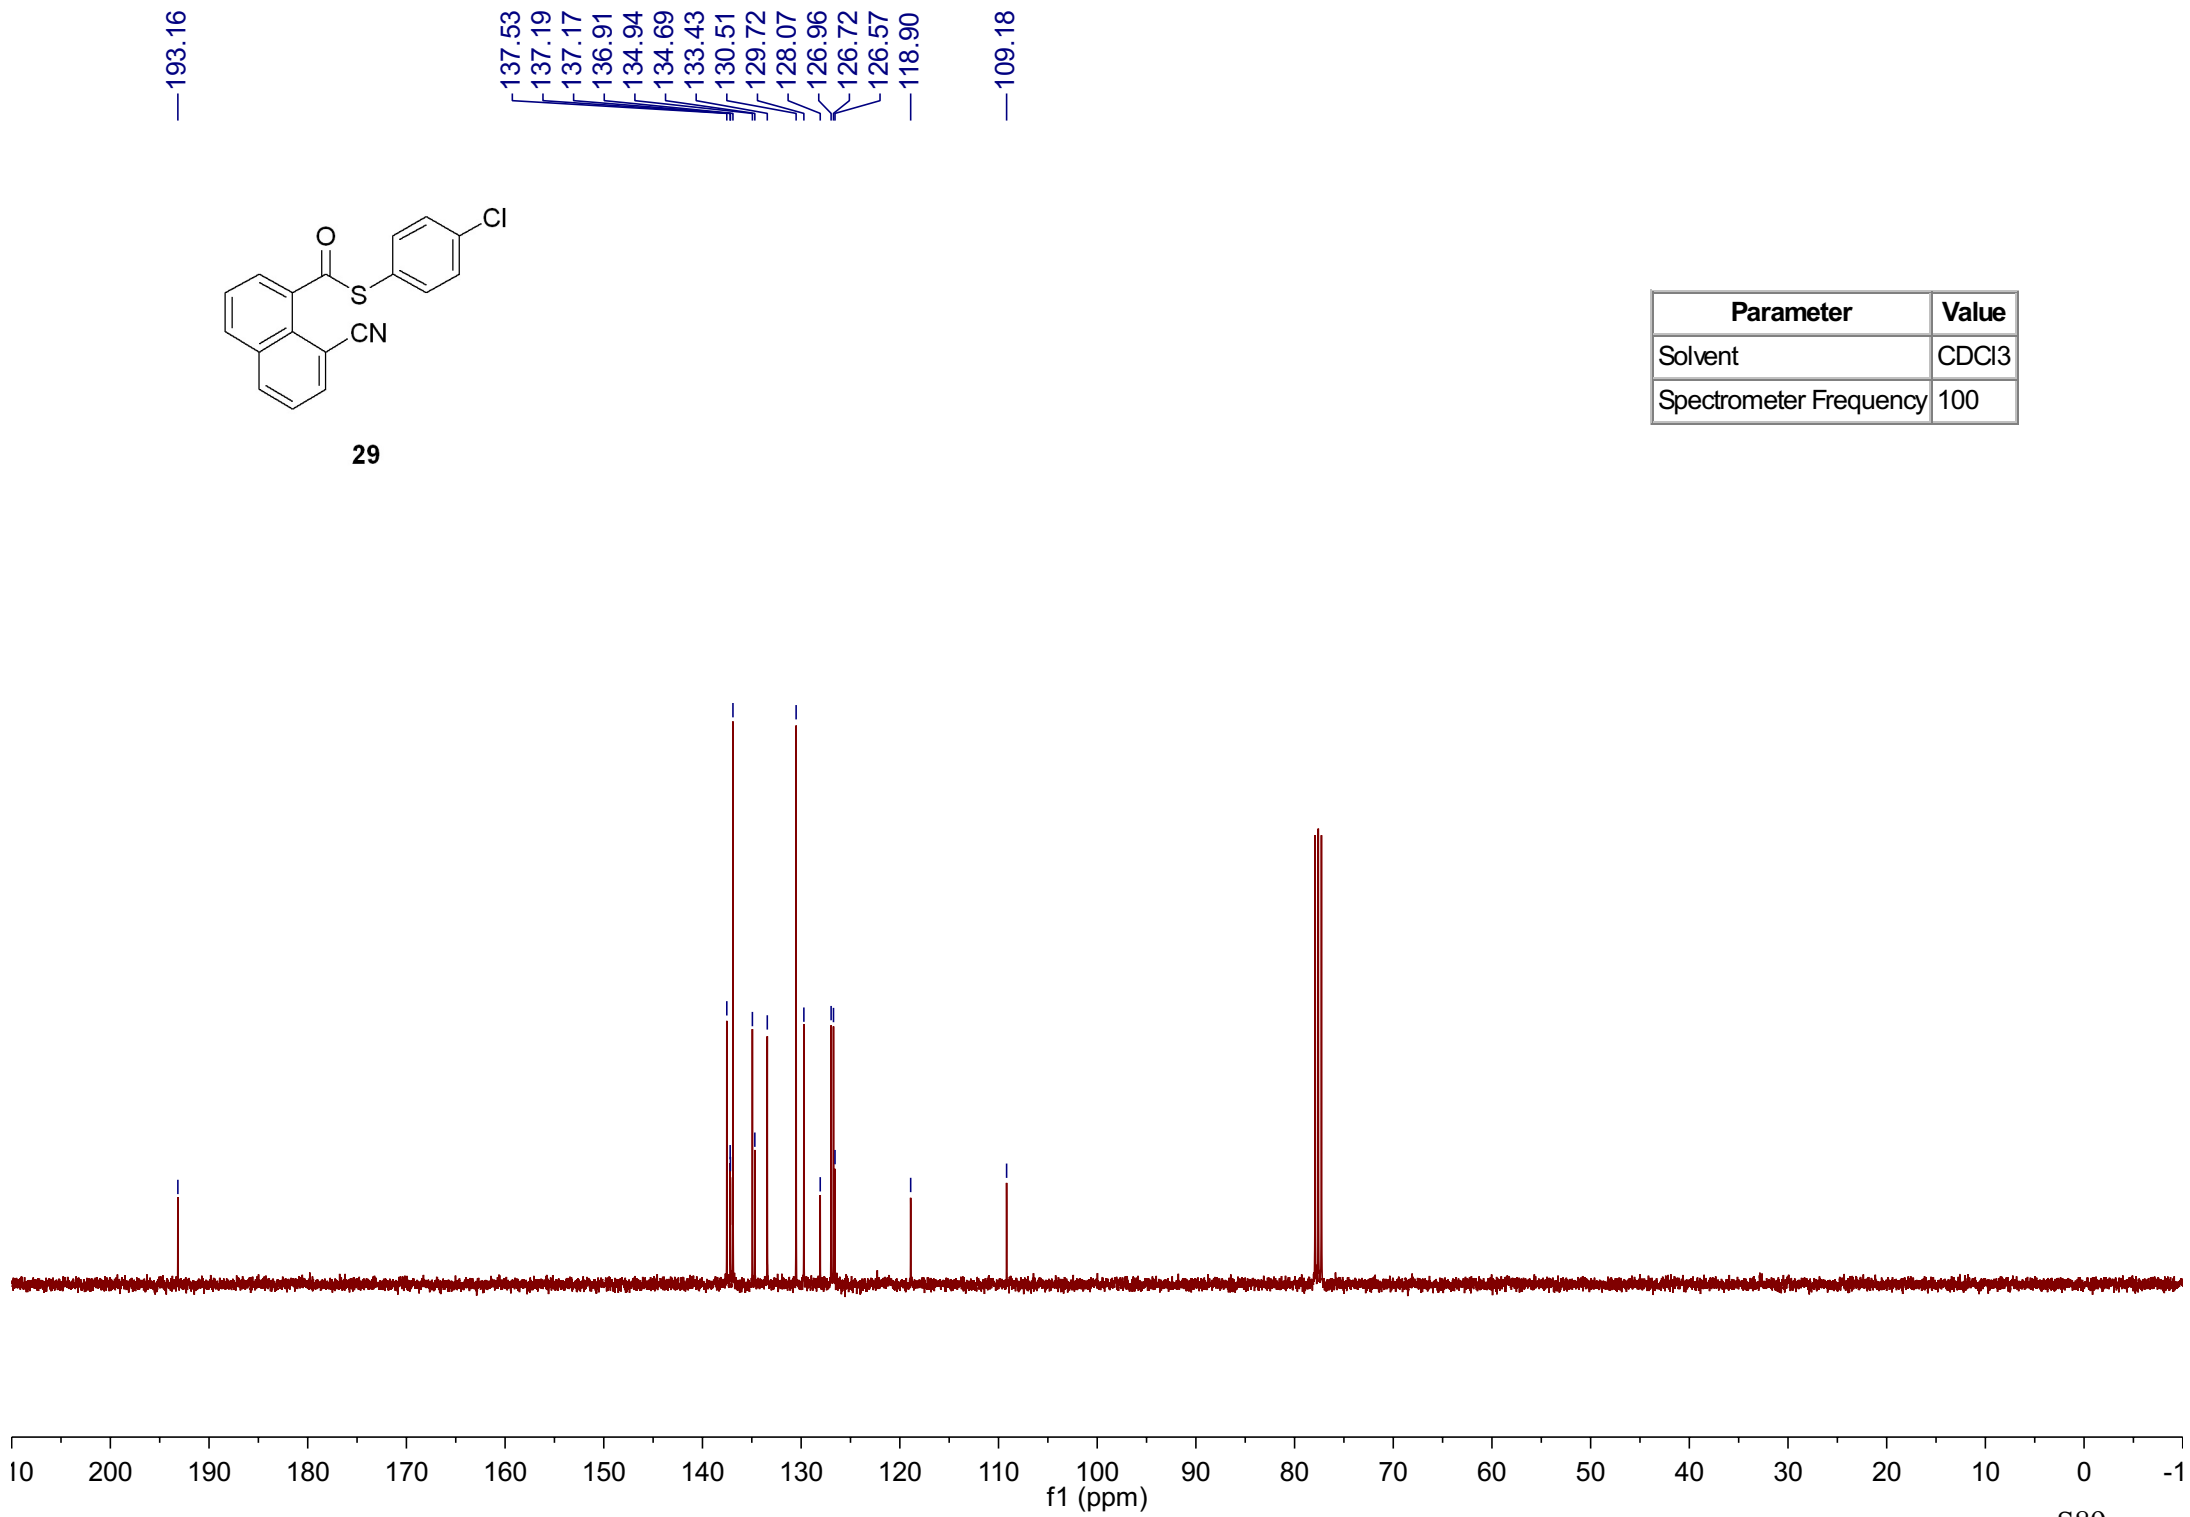

7.77  
7.76  
7.72  
7.72  
7.71  
7.71  
7.70  
7.70  
7.57  
7.56  
7.39  
7.39  
7.38  
7.38  
7.37  
7.37  
7.26

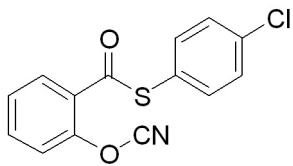

30

| Parameter              | Value |
|------------------------|-------|
| Solvent                | CDCl3 |
| Spectrometer Frequency | 600   |

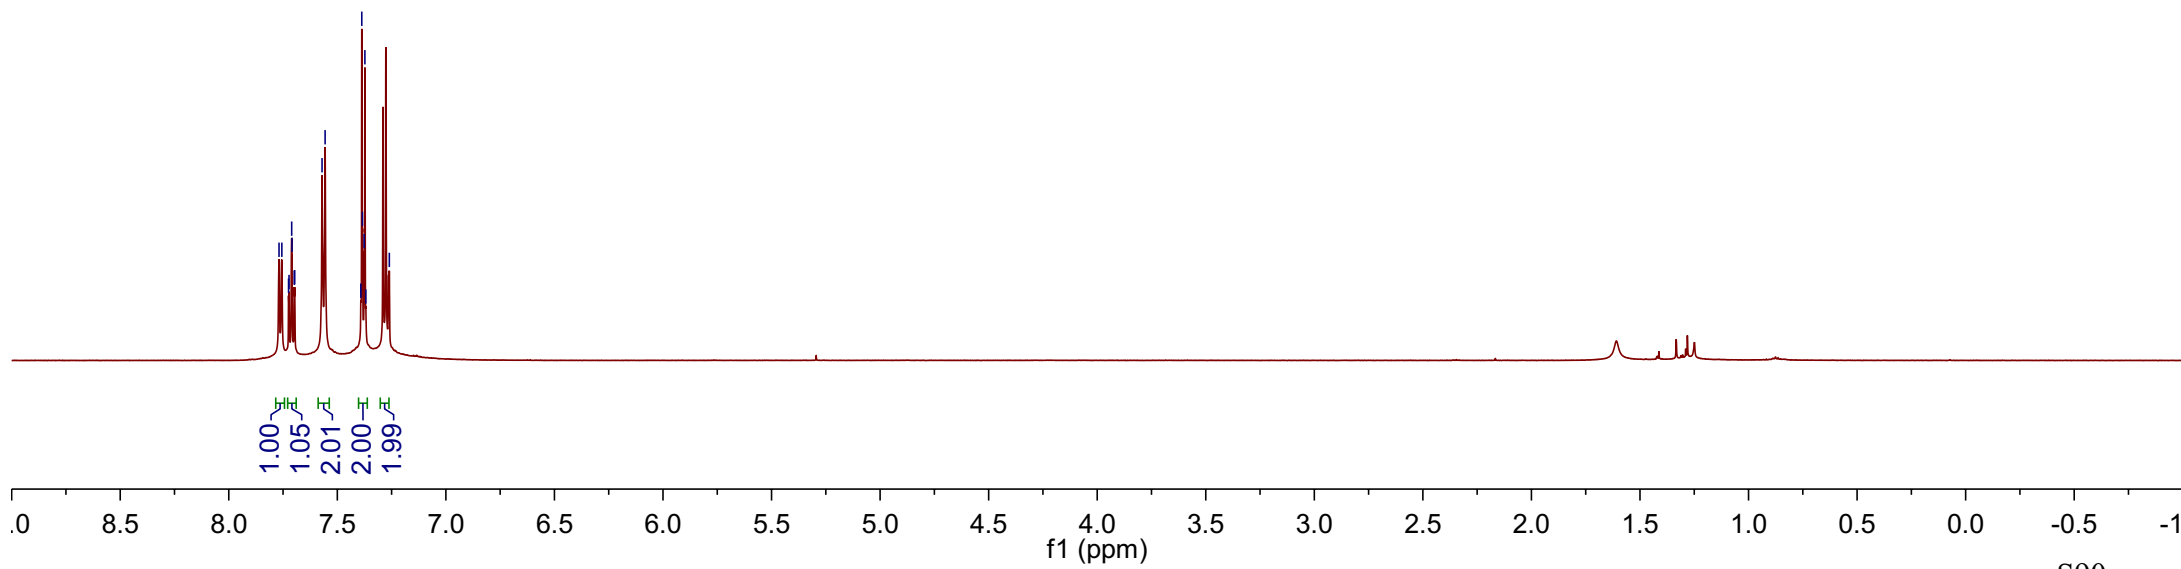

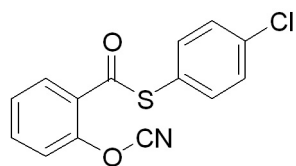

30

— 176.82 — 163.94 — 146.66 — 138.99 — 135.64 — 133.96 — 129.72 — 127.45 — 125.73 — 125.19 — 121.63 — 113.40

| Parameter              | Value             |
|------------------------|-------------------|
| Solvent                | CDCl <sub>3</sub> |
| Spectrometer Frequency | 150               |

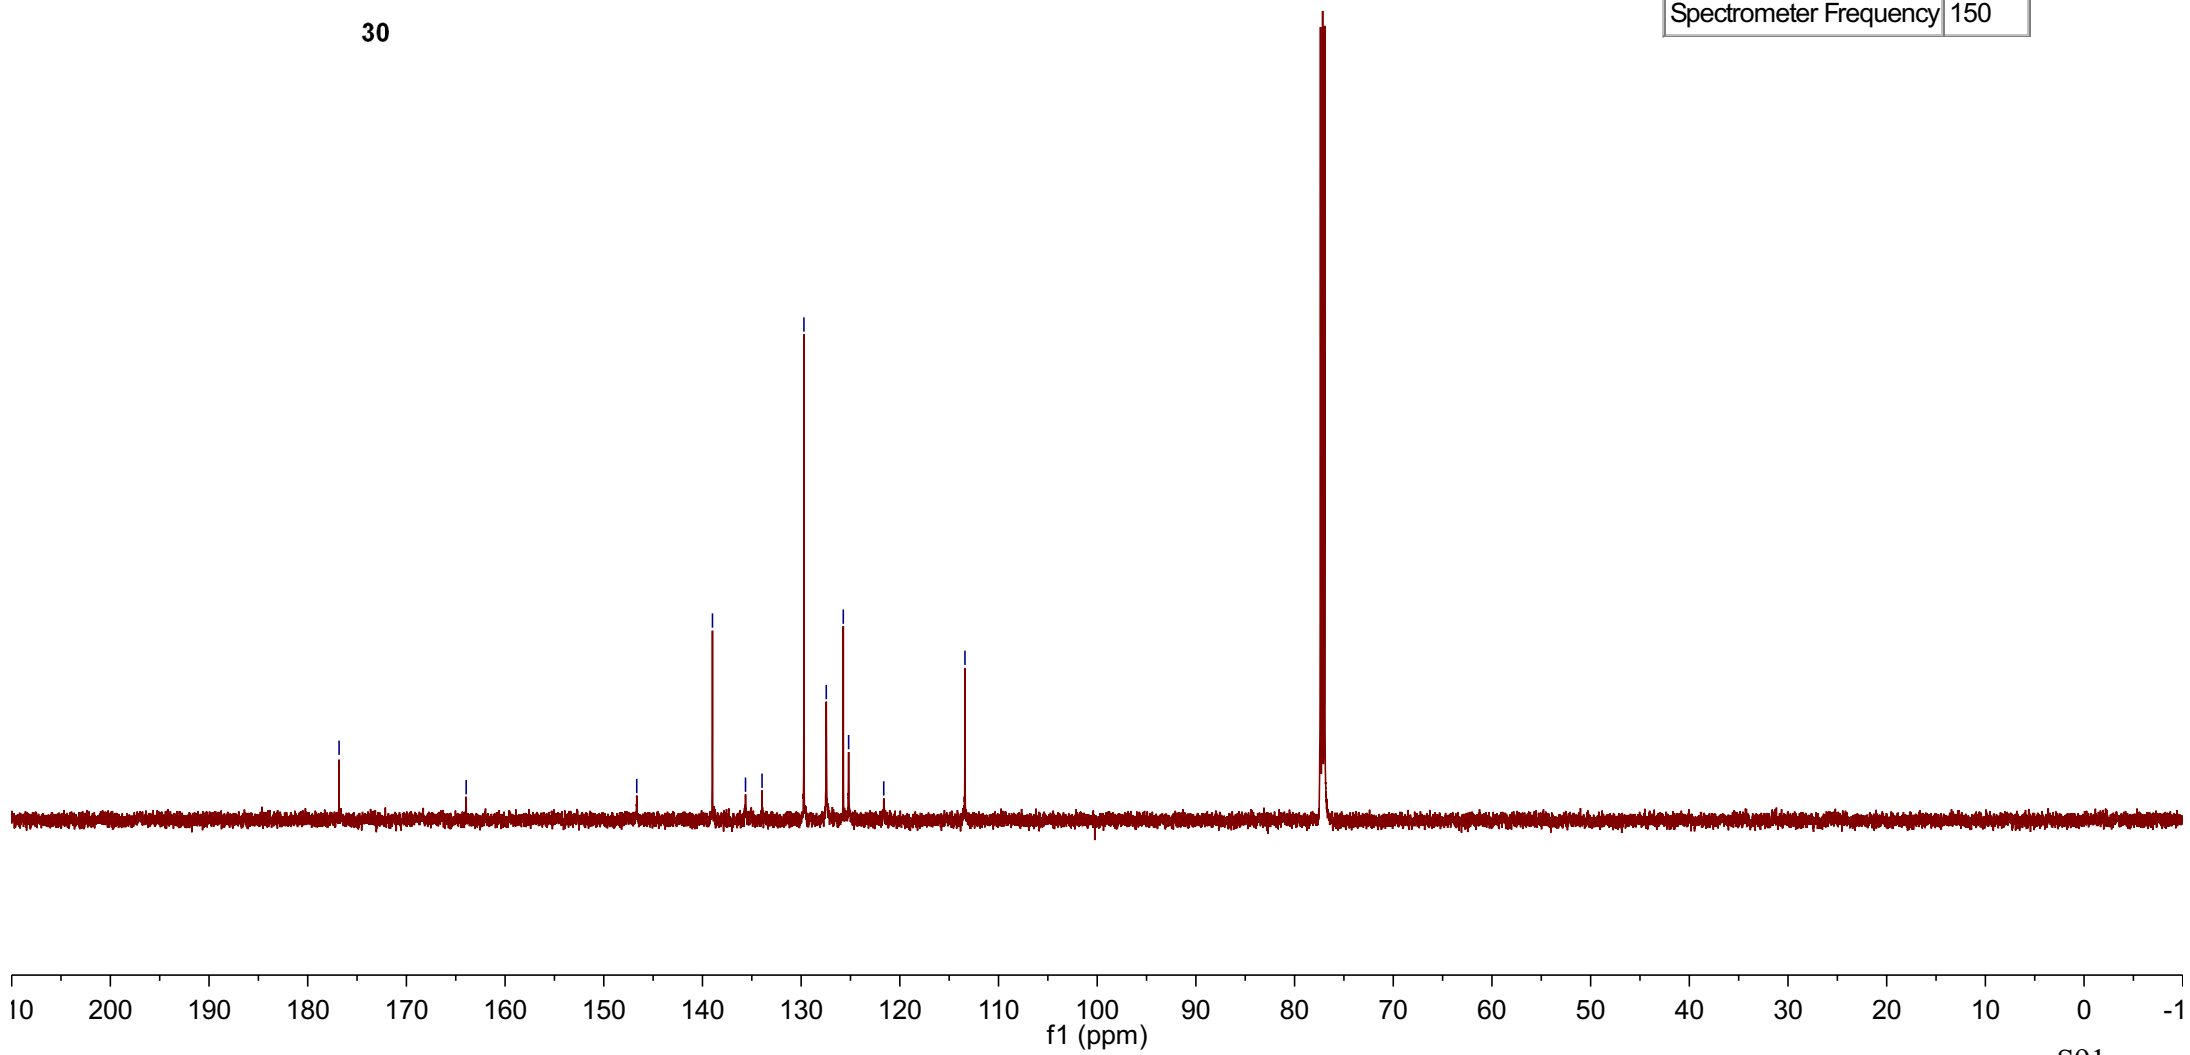

7.98  
7.97  
7.96  
7.96  
7.52  
7.52  
7.51  
7.51  
7.50  
7.50  
7.46  
7.45  
7.43  
7.39  
7.38  
7.37  
7.37  
7.33  
7.32  
7.26

2.94  
2.93  
2.92  
2.35  
2.33  
2.32  
1.99  
1.98  
1.97  
1.96  
1.94

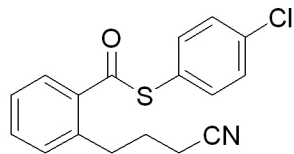

31

| Parameter              | Value             |
|------------------------|-------------------|
| Solvent                | CDCl <sub>3</sub> |
| Spectrometer Frequency | 600               |

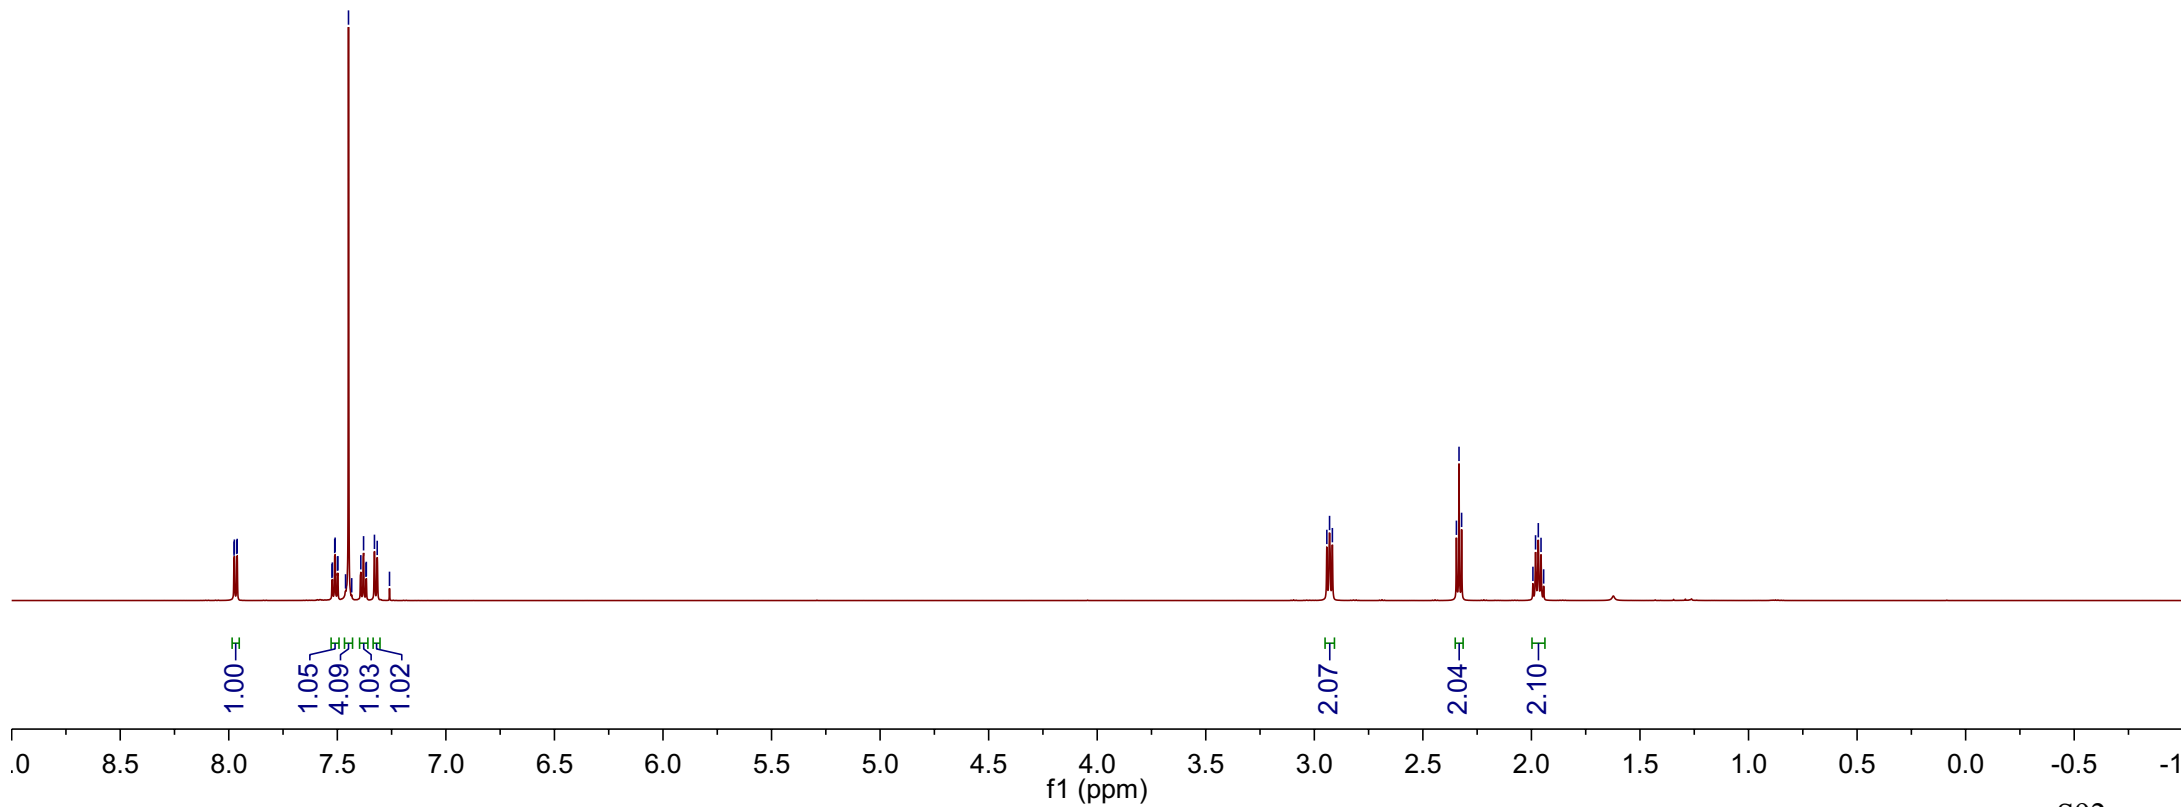

—192.64

139.79  
136.83  
136.59  
136.56  
133.03  
131.71  
130.04  
129.58  
127.30  
126.74  
—119.88

—32.44

—26.93

—16.46

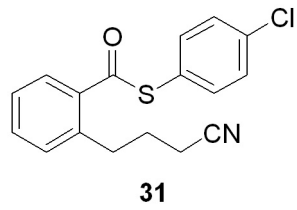

| Parameter              | Value             |
|------------------------|-------------------|
| Solvent                | CDCl <sub>3</sub> |
| Spectrometer Frequency | 150               |

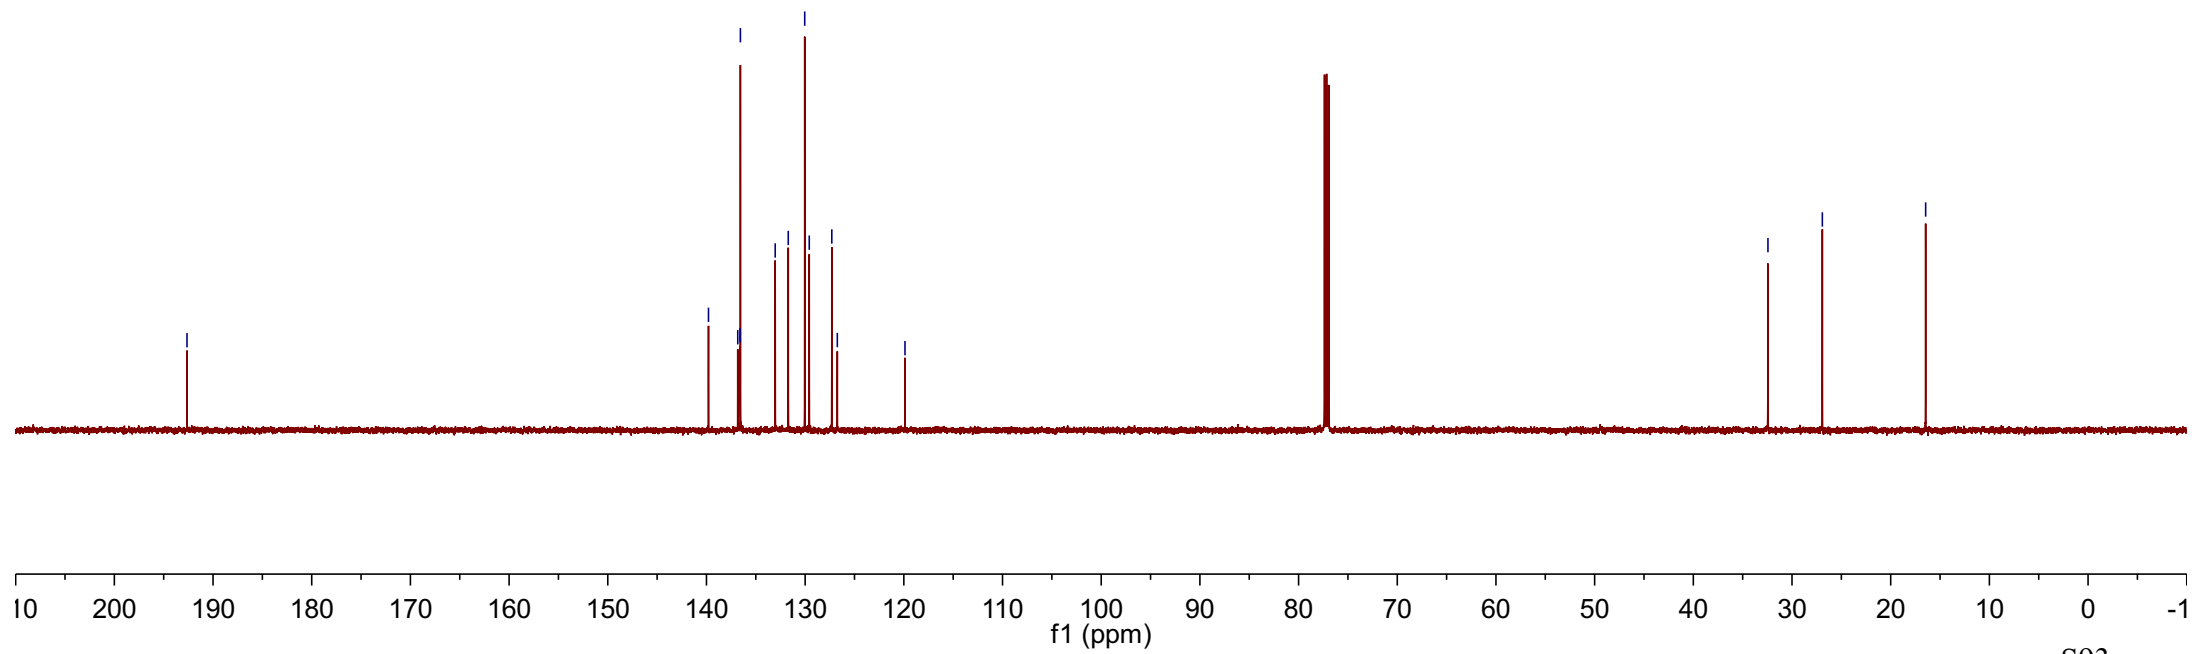

8.38  
8.36  
8.11  
8.09  
7.99  
7.97  
7.66  
7.64  
7.63  
7.61  
7.59  
7.57  
7.48  
7.46  
7.45  
7.26  
7.23  
7.21  
7.13  
7.11  
7.10  
7.03  
7.01  
6.77  
6.75

4.27

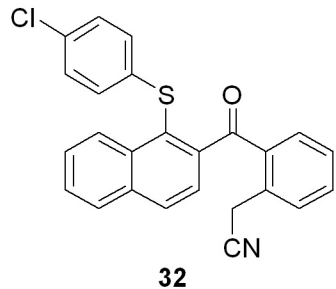

| Parameter              | Value             |
|------------------------|-------------------|
| Solvent                | CDCl <sub>3</sub> |
| Spectrometer Frequency | 400               |

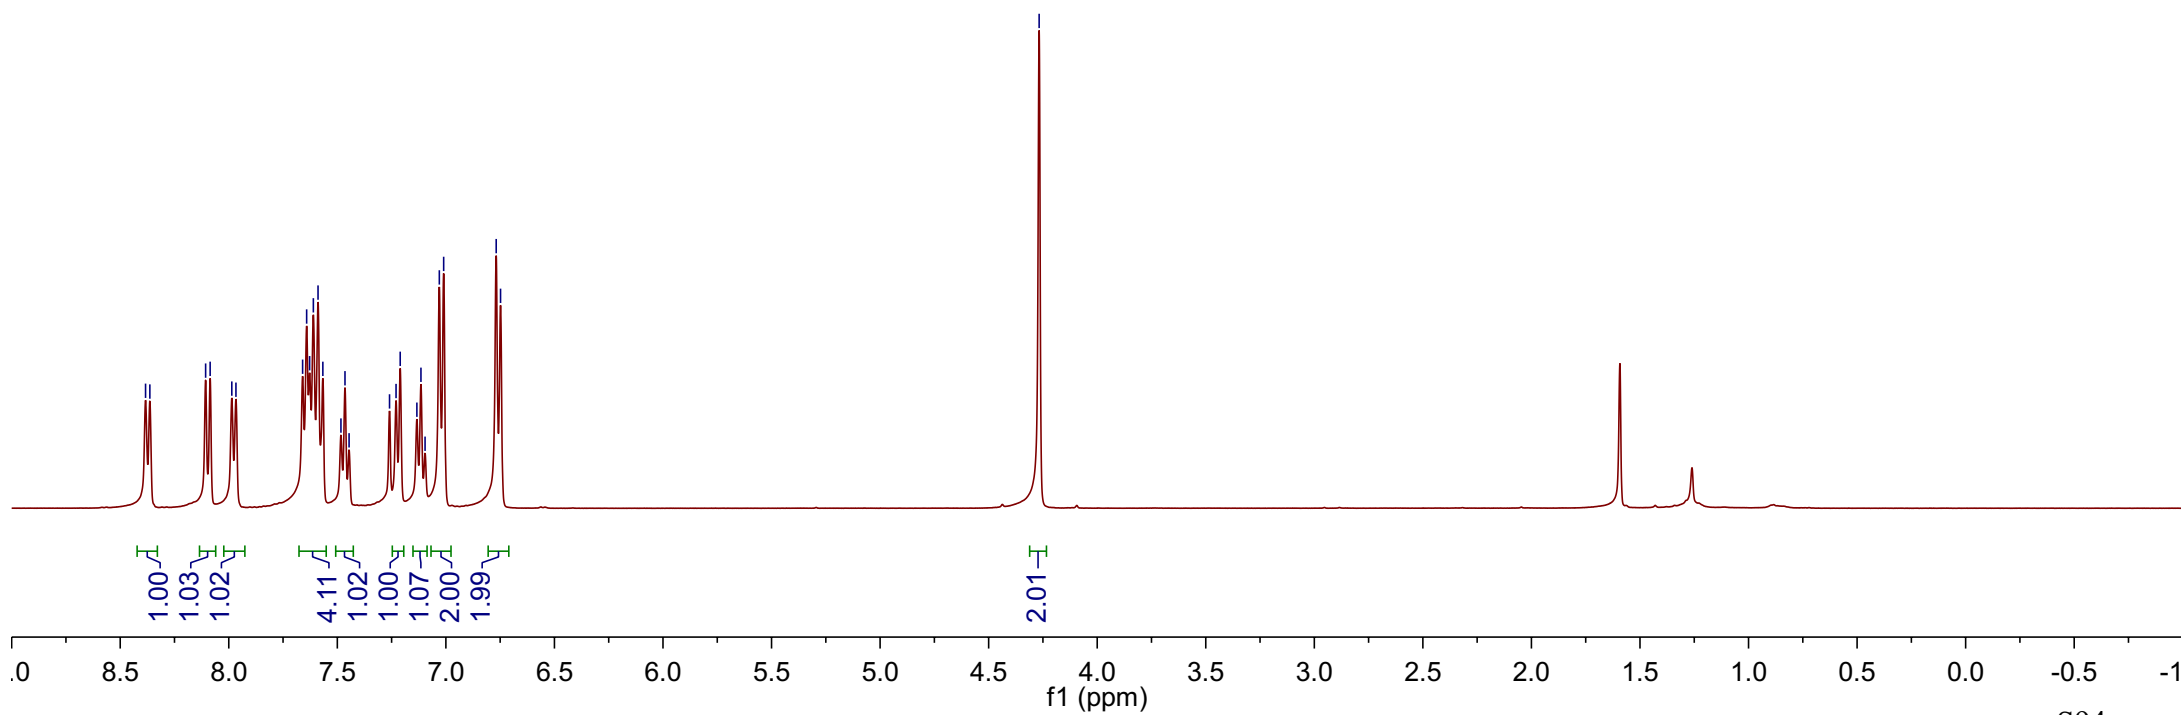

—199.92

—145.97

133.30  
129.85  
129.81  
129.51  
128.80  
128.57  
127.82

—22.97

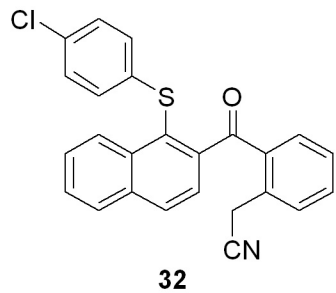

| Parameter              | Value             |
|------------------------|-------------------|
| Solvent                | CDCl <sub>3</sub> |
| Spectrometer Frequency | 100               |

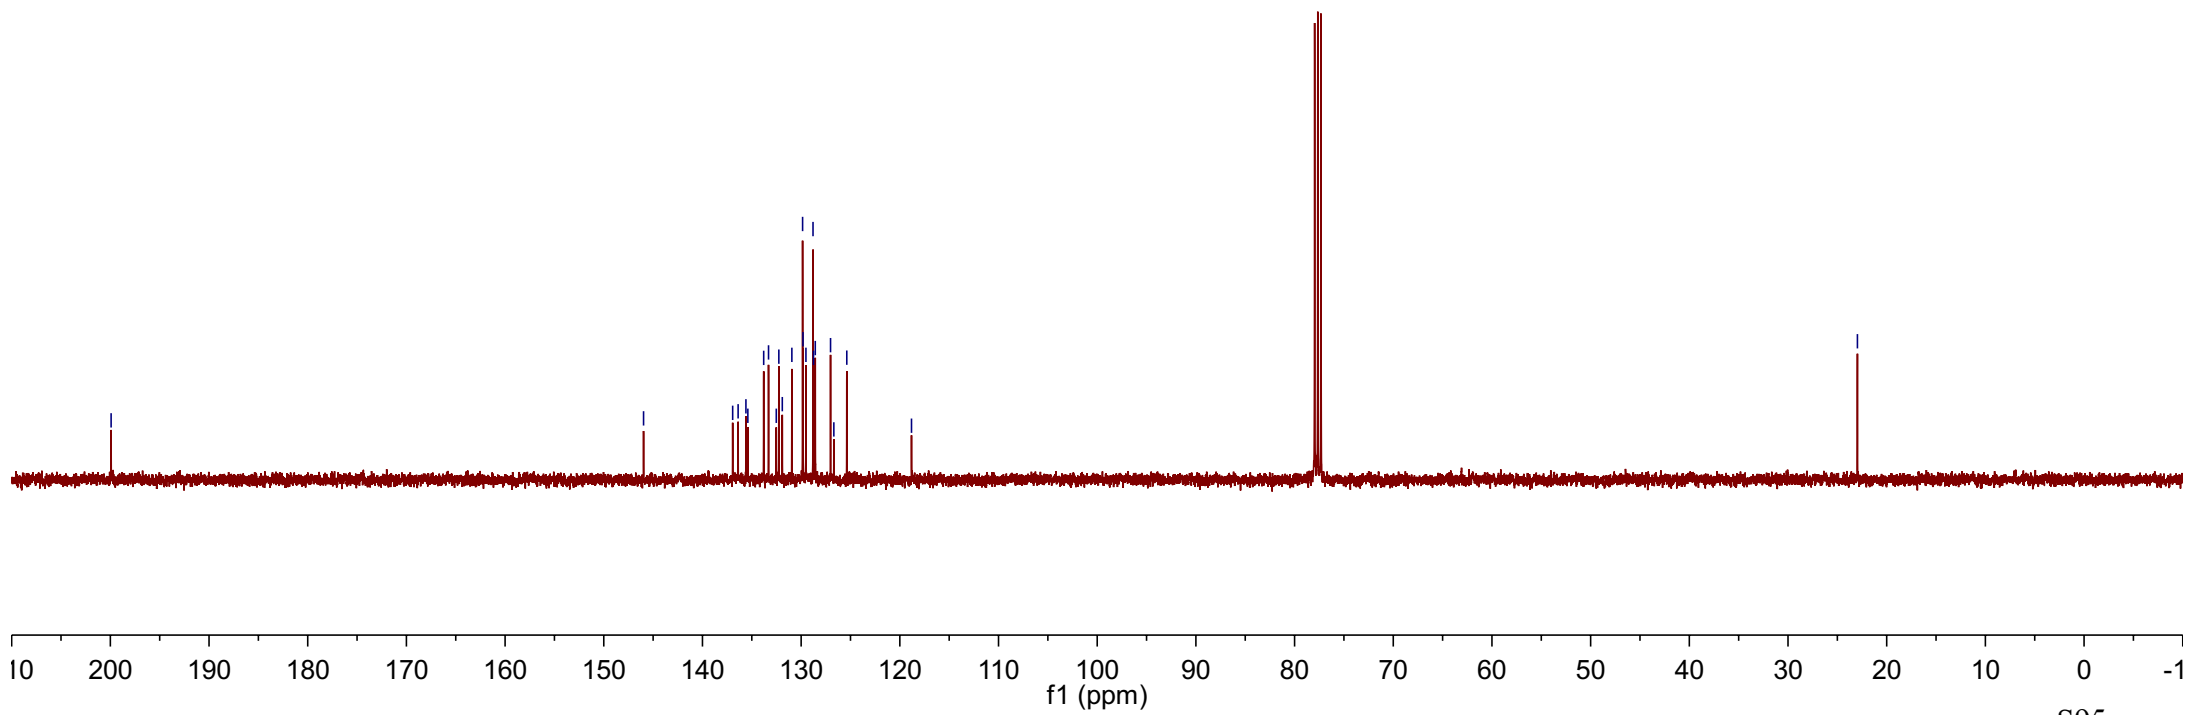

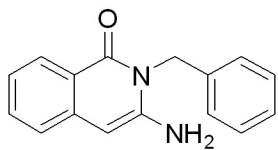

**33**

| Parameter              | Value |
|------------------------|-------|
| Solvent                | DMSO  |
| Spectrometer Frequency | 600   |

7.98  
7.96  
7.43  
7.31  
7.30  
7.28  
7.24  
7.23  
7.23  
7.22  
7.20  
7.18  
7.04  
5.96  
5.69  
5.34  
2.50

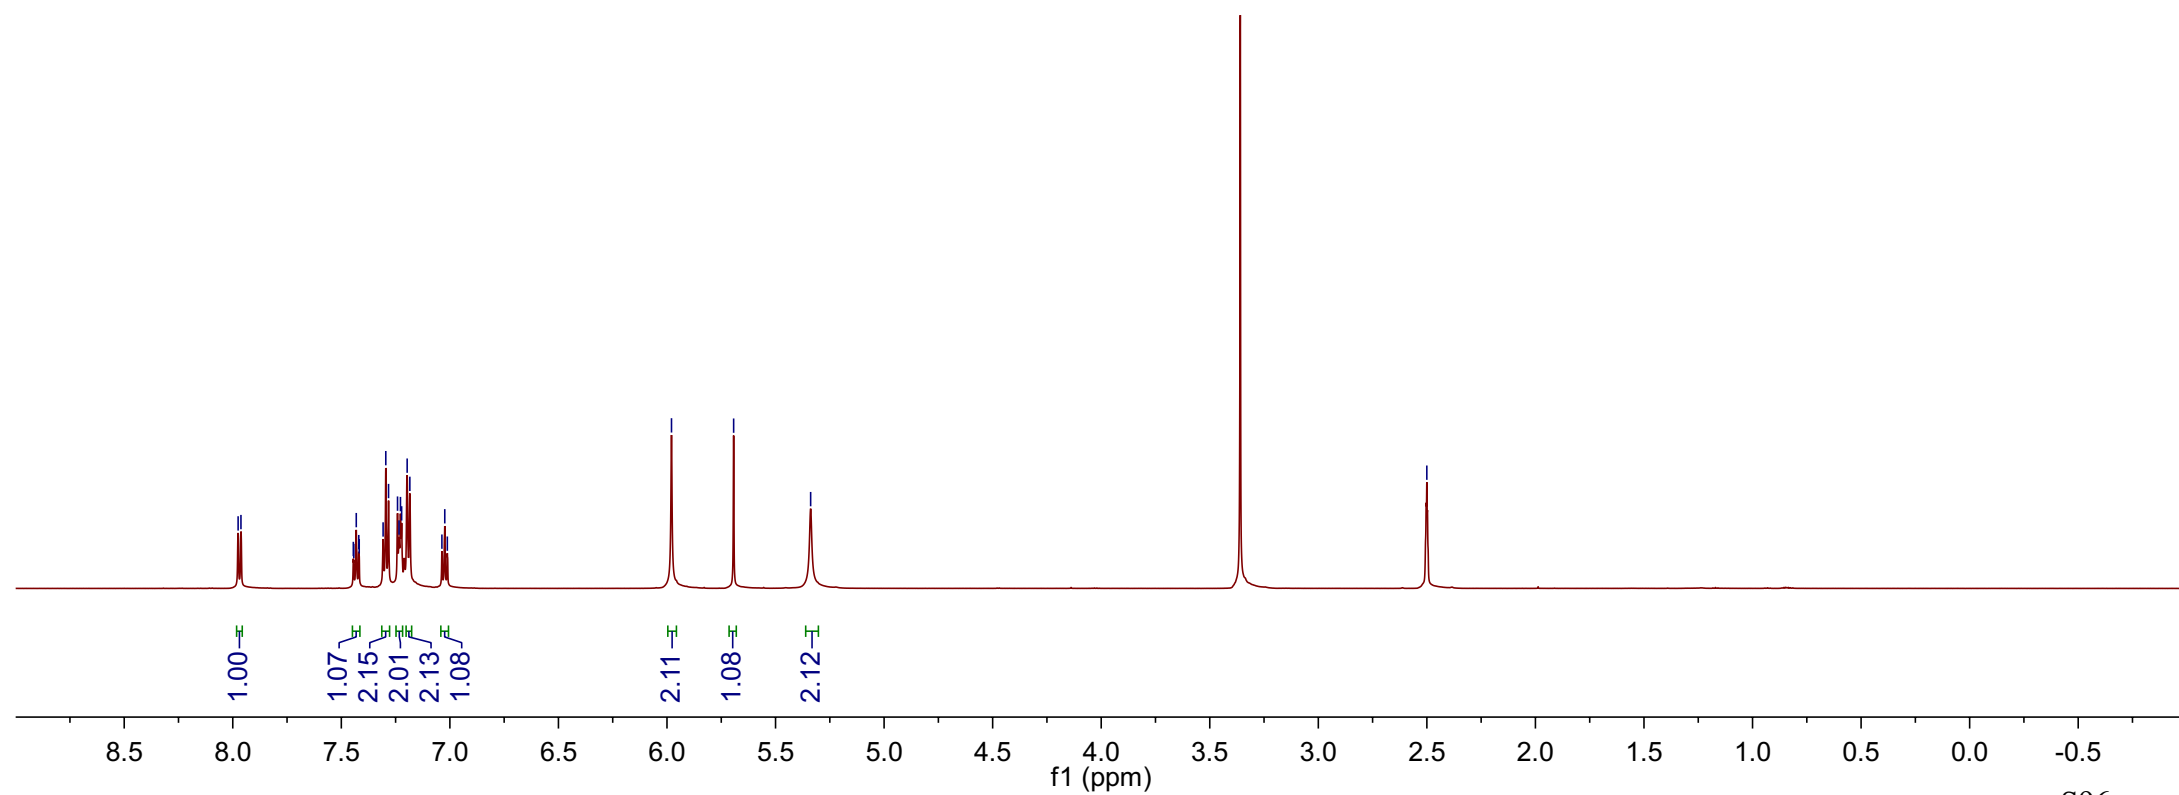



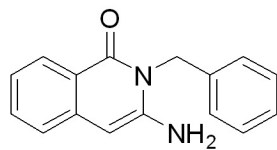

33

—162.69  
 —147.78  
 140.15  
 137.81  
 132.83  
 128.87  
 128.03  
 127.39  
 127.20  
 123.71  
 121.43  
 118.46

—82.84

—43.82

| Parameter              | Value |
|------------------------|-------|
| Solvent                | DMSO  |
| Spectrometer Frequency | 150   |

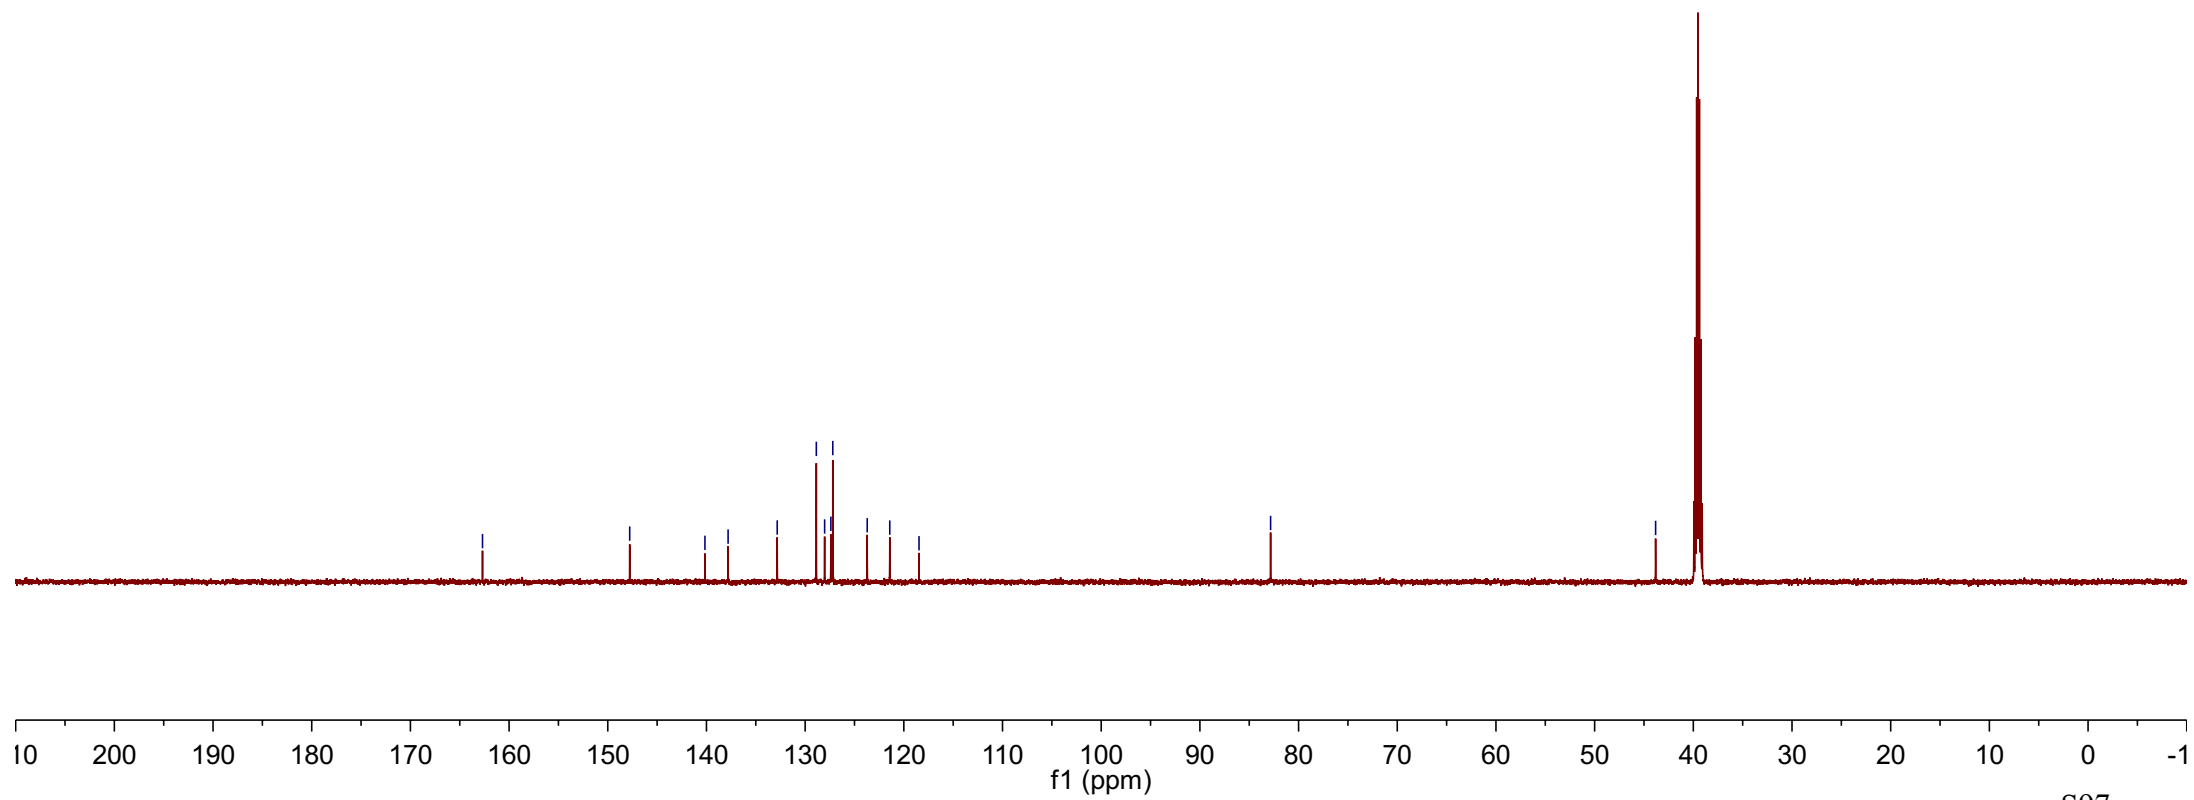

8.22  
8.21  
7.58  
7.57  
7.56  
7.47  
7.46  
7.44  
7.43  
7.42  
7.31  
7.29  
7.28  
7.26  
7.25  
7.24  
7.23

5.19

4.06

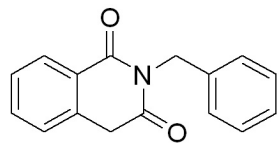

34

| Parameter              | Value |
|------------------------|-------|
| Solvent                | CDCl3 |
| Spectrometer Frequency | 600   |

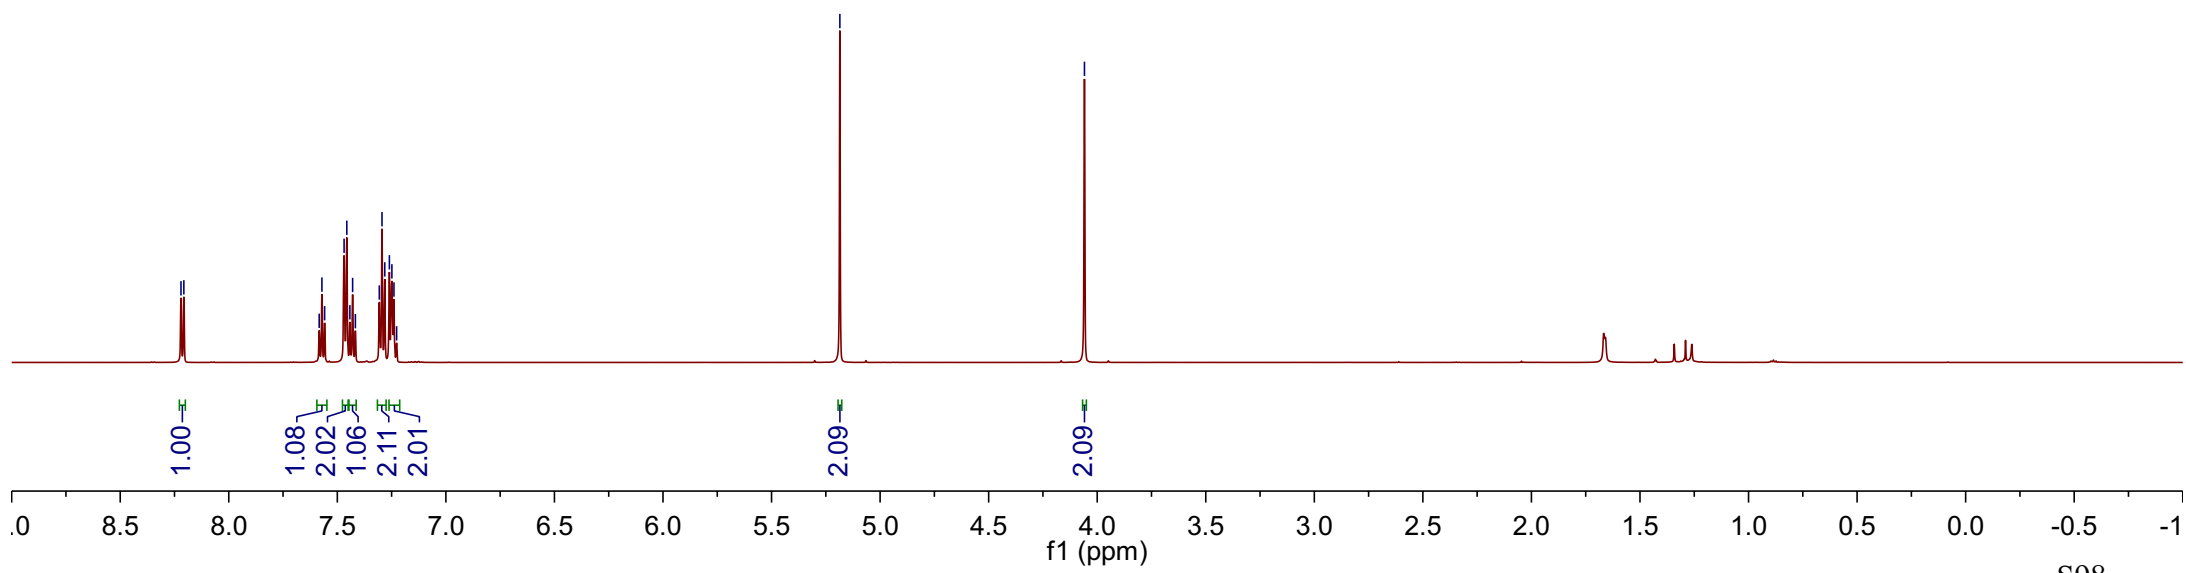

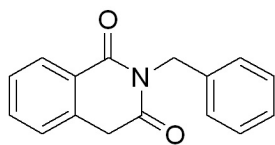

34

—170.59  
—165.49

137.53  
134.54  
134.16  
129.71  
129.41  
128.85  
128.17  
127.95  
127.54  
125.76

—43.20  
—36.38

| Parameter              | Value             |
|------------------------|-------------------|
| Solvent                | CDCl <sub>3</sub> |
| Spectrometer Frequency | 150               |

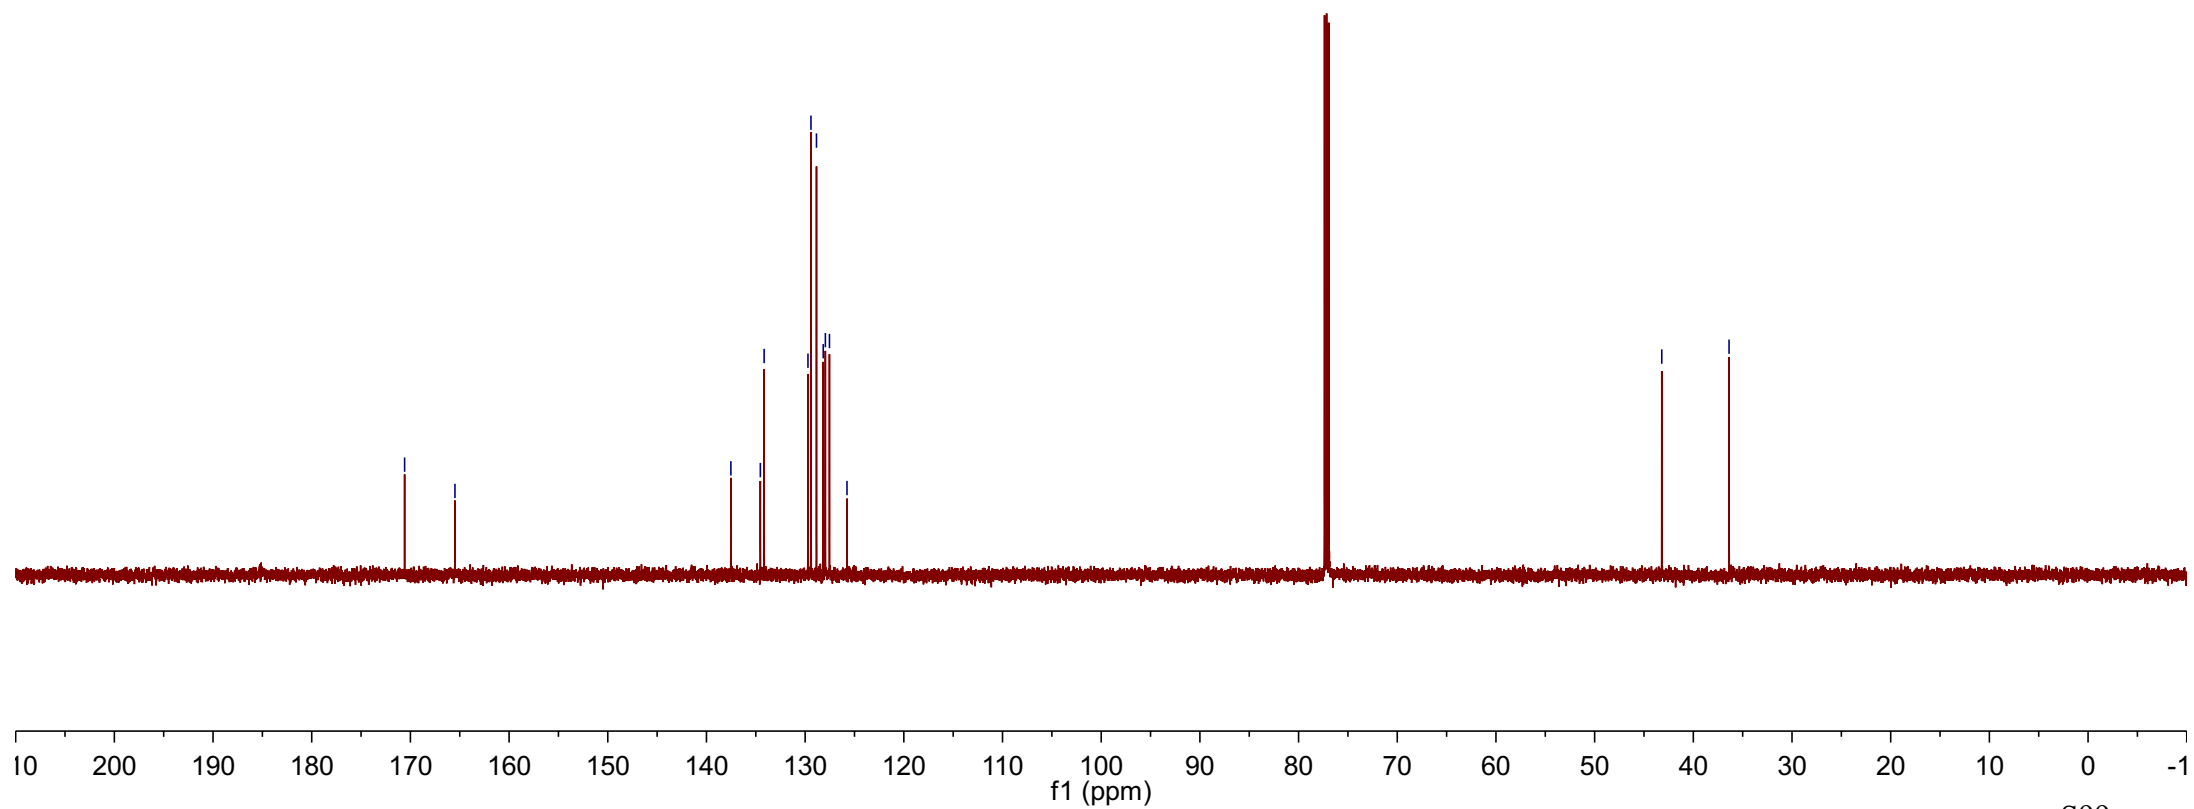

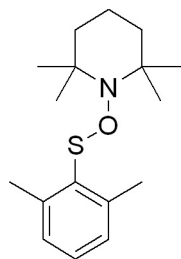

**35**

7.26  
7.14  
7.12  
7.11  
6.95  
6.94

— 2.62

— 1.70

~ 1.13  
~ 1.05

| Parameter              | Value             |
|------------------------|-------------------|
| Solvent                | CDCl <sub>3</sub> |
| Spectrometer Frequency | 600               |

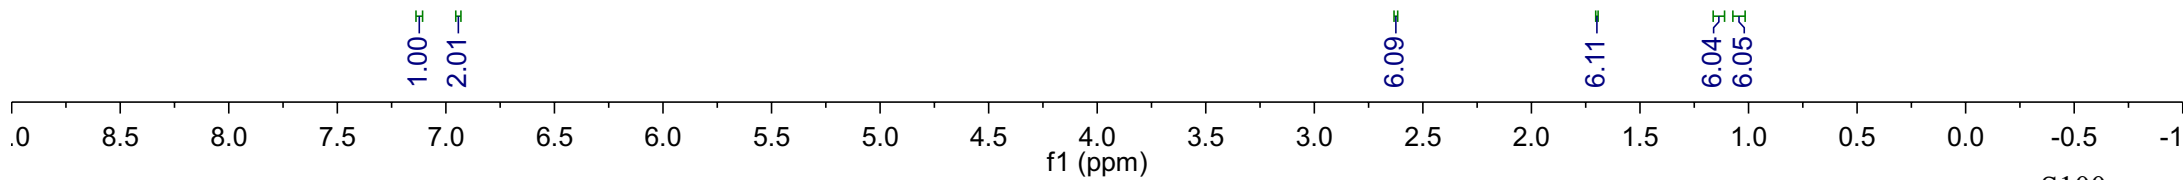

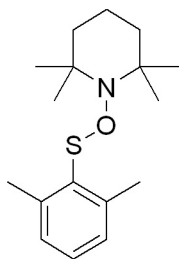

35

— 142.63  
 — 138.45  
 ~ 131.36  
 ~ 129.97

— 62.35

— 42.74  
 — 38.80  
 ~ 31.77  
 ~ 31.33  
 ~ 30.31  
 ~ 21.89  
 ~ 20.20  
 ~ 16.84  
 ~ 16.68

| Parameter              | Value             |
|------------------------|-------------------|
| Solvent                | CDCl <sub>3</sub> |
| Spectrometer Frequency | 150               |

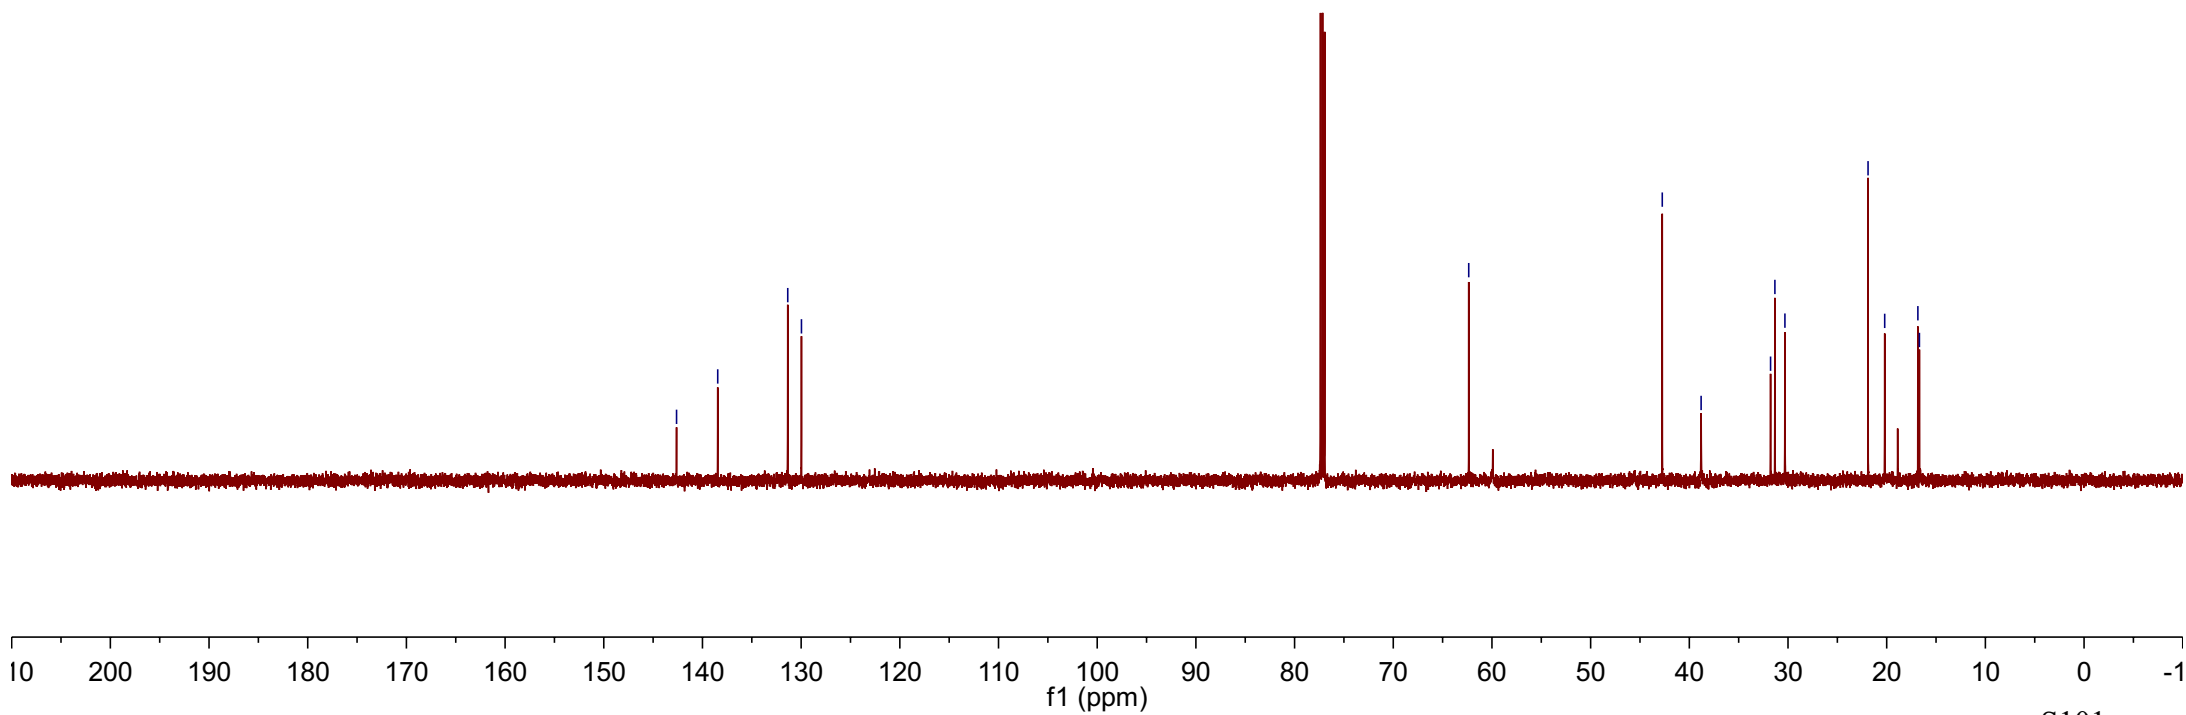

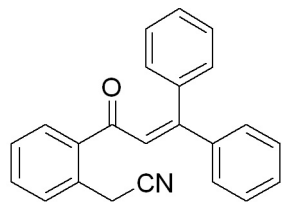

**36**

7.76  
7.76  
7.75  
7.75  
7.47  
7.46  
7.41  
7.41  
7.41  
7.40  
7.39  
7.39  
7.38  
7.38  
7.37  
7.27  
7.26  
7.25  
7.24  
7.24  
7.24  
7.23  
7.13  
7.13  
7.12  
7.11  
6.95

4.05

| Parameter              | Value             |
|------------------------|-------------------|
| Solvent                | CDCl <sub>3</sub> |
| Spectrometer Frequency | 600               |

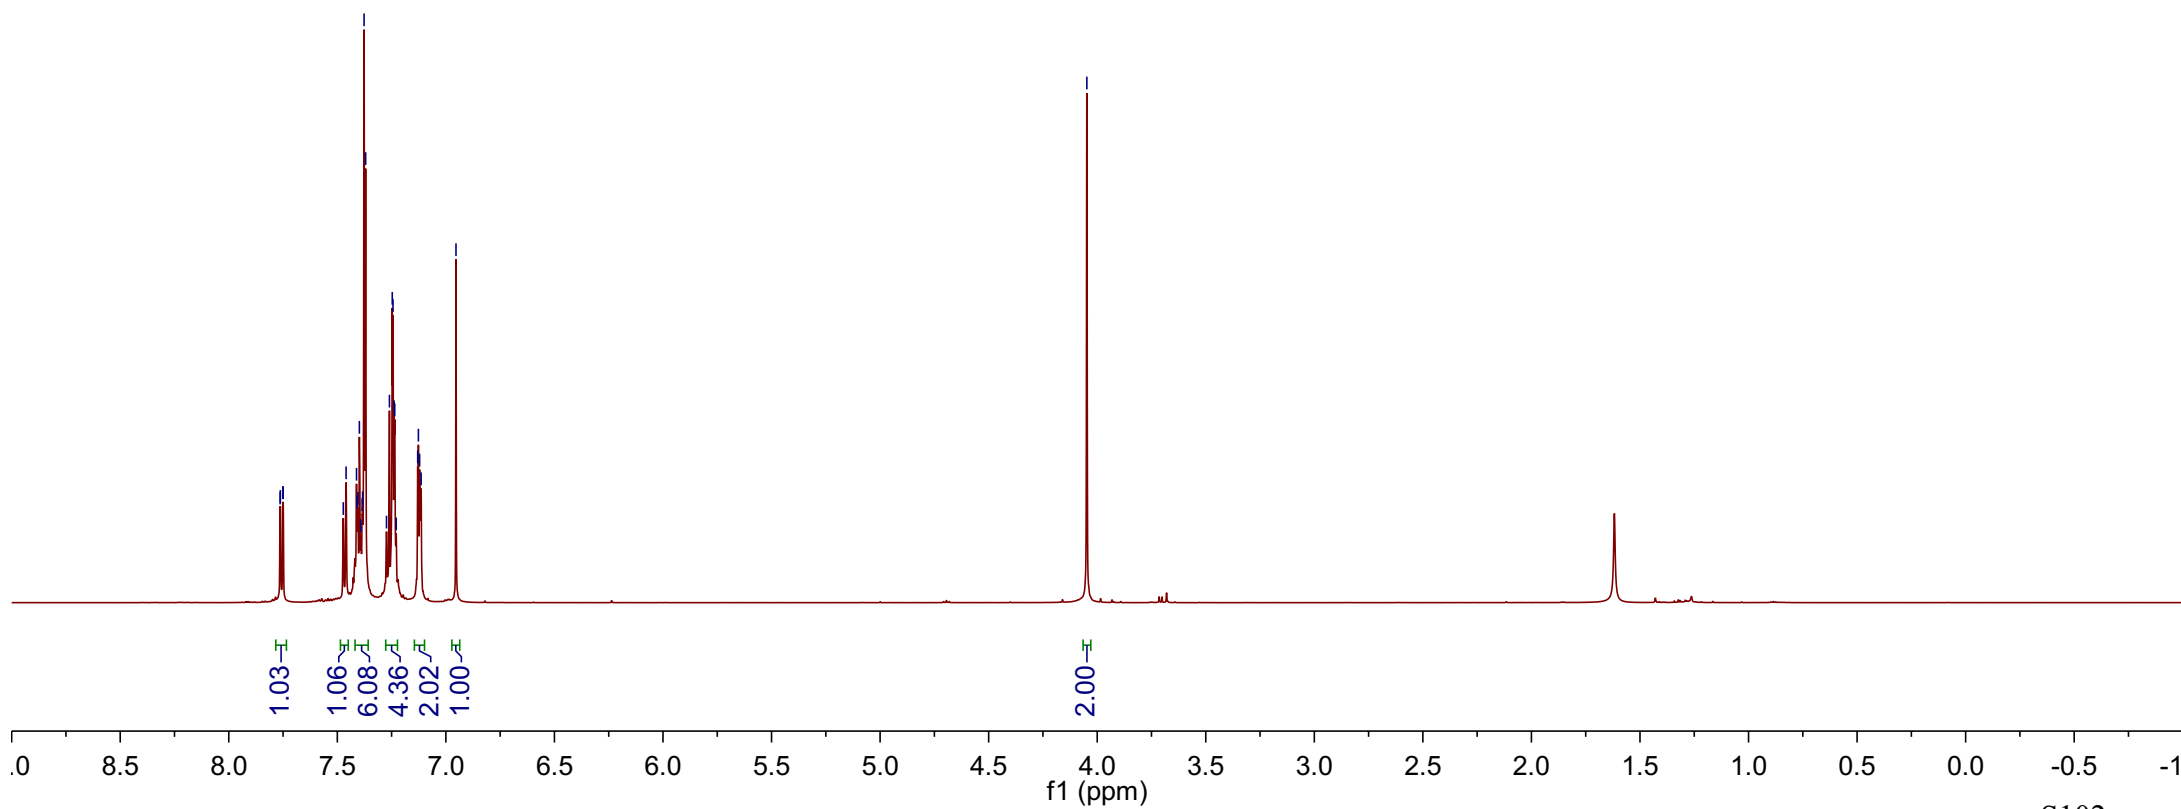

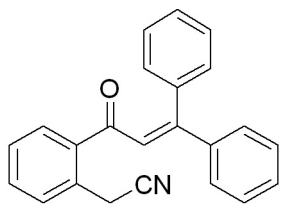

**36**

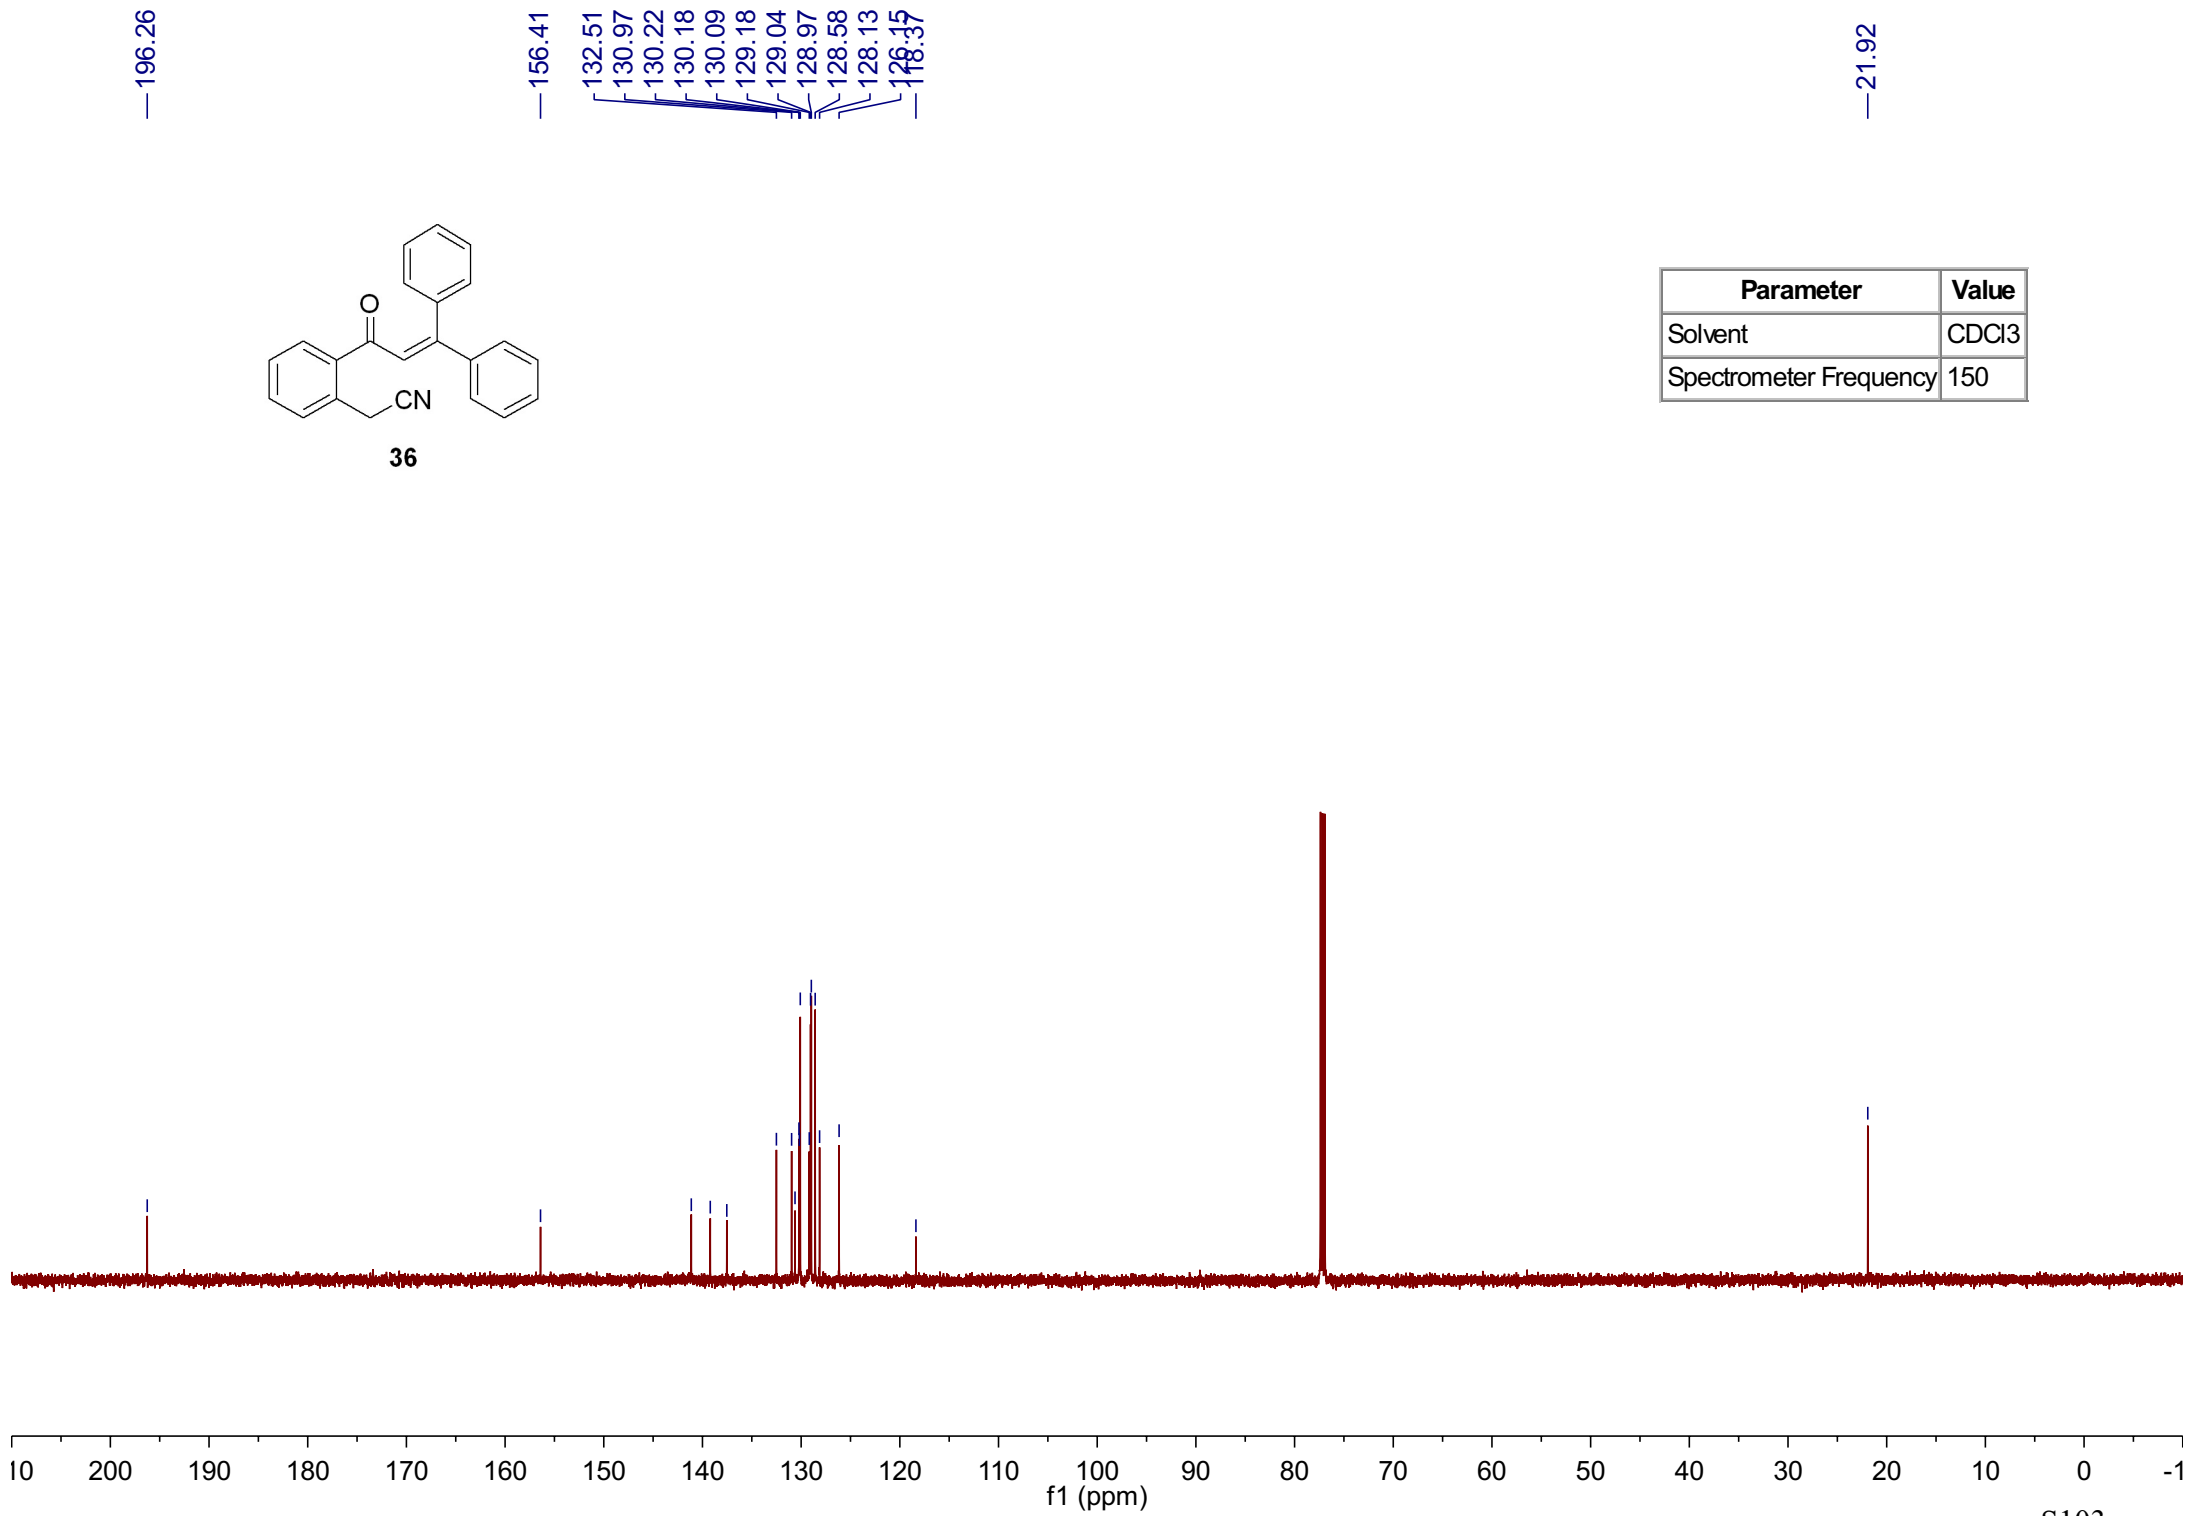

| Parameter              | Value             |
|------------------------|-------------------|
| Solvent                | CDCl <sub>3</sub> |
| Spectrometer Frequency | 150               |
